# Supplementary material
Source: Research Square preprint supplement (doi:10.21203/rs.3.rs-9632664/v1)
Supplement: Supplementary file 1 [file 26ee8569aeb8f33724e4e8f3.xlsx]

## Sheet: Sheet1
Pvalue	12-Methoxyajmaline	Flavocristamide B	Mosloflavanone	Pristanic acid	15-methyl-15R-PGE2	Vernolic acid	3-(8,11,14-Pentadecatrienyl)phenol	Fischeroside A	2-Keto-D-Gluconic acid	1,4-diamino-2,3-dicyano-1,4-bis(phenylthio)butadiene	7-Ketolithocholic acid	Revandchinone 1	Indole-3-acetyl-L-aspartic acid	Versicolorone	Topsentisterol C3	(9Z,12Z)-3-hydroxyhexadecadienoylcarnitine	3,4-Bis(trifluoromethyl)-1H-pyrazole	Cucurbitacin E	Aloesin	risperidone	1-(3-Methylbenzoyl)-1H-indazole-3-carbonitrile	Malyngamide R	D-Gluconic Acid	PS(20:0/14:1(9Z))	Vitexin 7-O-sulfate	5-Doxyl	Gibberellin A32	N5-Acetyl-N2-gamma-L-glutamyl-L-ornithine	Ciprostene	2-Nonadecanone	PA(14:0(3-OH)/17:0cycw7)	Tianshic acid methylester	Serinolamide A	3-FUROIC ACID	Phaeofuran B	Pyropheophorbide a	Chaparrin	FAHFA 36:1	Ailanquassin A	Diethyl sulfate	LysoPS(18:1(9Z)/0:0)	Hydrangea glucoside B	Ferulic acid 4-sulfate	[7]-Gingerol	7,8,3',4',5'-Pentamethoxy-6'',6''-dimethylpyrano[2'',3'':5,6]flavone	5beta-Cholanic acid	Melophlin E	Cyrmenin A	N5-Dinitrophenyl-L-ornithine methyl ester
12-Methoxyajmaline	0	1.4085e-09	0.0553406	0.00696163	1.5441e-14	0.00958751	4.28276e-12	0.714938	0.63205	0.00255063	0.0418692	0.871215	0.708782	0.000754802	0.360724	0.23468	0.000975273	0.491203	0.725293	0.0741223	0.843638	0.413295	0.168387	0.00104043	0.585801	0.250038	0.00979303	0.604581	0.00311118	0.0728459	0.00221794	5.22232e-12	0.284909	0.431185	0.0518483	0.406696	0.00440347	0.0417868	0.00271071	0.57902	0.031487	0.462646	0.702961	0.00175795	0.291095	0.645589	0.0277672	0.0276261	0.261193
Flavocristamide B	1.4085e-09	0	0.483952	0.0650984	2.12181e-08	0.0554051	3.4381e-15	0.434576	0.900419	1.05565e-06	0.343023	0.94494	0.801645	7.50527e-07	0.336215	0.782989	0.648869	0.423773	0.475608	0.000414517	0.313722	0.7614	0.335429	7.33942e-06	0.470237	0.417951	0.00309588	0.383452	0.000681246	0.000408231	0.000976955	2.62278e-14	0.0556391	0.54141	0.905604	0.680403	0.000388148	5.24338e-05	0.00904391	0.557635	0.00694928	0.348736	0.570412	1.41554e-07	0.582119	0.953926	0.0558946	0.738051	0.223484
Mosloflavanone	0.0553406	0.483952	0	0.698204	0.100537	0.437095	0.263342	0.962767	0.665309	0.599273	0.017733	0.148087	0.841729	0.558818	0.555276	0.469029	0.00298358	0.450895	0.650351	0.90823	0.400866	0.229682	0.934982	0.0863303	0.596558	0.548803	0.614478	0.0211179	0.0901341	0.868834	0.943523	0.239059	0.814438	0.904823	0.00363649	0.430961	0.732579	0.889576	0.960325	0.955089	0.790513	0.292129	0.832205	0.732238	0.53801	0.285352	0.10936	0.231613	0.79447
Pristanic acid	0.00696163	0.0650984	0.698204	0	0.0218566	0.000348625	0.00765684	0.738995	0.646244	0.688075	0.654036	0.859796	0.371079	0.951087	0.454188	0.021252	0.0137338	0.284214	0.555551	0.0237304	0.541758	0.314964	0.372354	0.0526446	0.677538	0.995432	0.0556316	0.523628	0.00017592	0.208068	0.000336938	0.00543854	0.0123761	0.20723	0.643291	0.446095	0.00242653	0.104883	0.463378	0.999211	0.00153113	0.167913	0.382639	0.369463	0.344174	0.126331	2.73841e-06	0.791766	0.829998
15-methyl-15R-PGE2	1.5441e-14	2.12181e-08	0.100537	0.0218566	0	0.000351782	6.65626e-11	0.79593	0.192567	0.00621985	0.0234982	0.810106	0.811019	0.00418933	0.373159	0.555845	0.00331522	0.416001	0.744078	0.0489309	0.884854	0.209788	0.326582	0.00423091	0.44228	0.26521	0.0240159	0.762552	0.00295573	0.0593073	0.000255128	1.99755e-11	0.342842	0.539624	0.0236663	0.778196	0.000773542	0.0231257	0.0168617	0.943256	0.0958667	0.438244	0.859408	0.0145389	0.408506	0.471917	0.0867696	0.0691762	0.18131
Vernolic acid	0.00958751	0.0554051	0.437095	0.000348625	0.000351782	0	0.023098	0.13367	0.50375	0.987773	0.88213	0.853428	0.389789	0.973079	0.185998	0.361587	0.0077102	0.193161	0.990625	0.107339	0.728335	0.922988	0.674824	0.0117927	0.104706	0.408814	0.532918	0.56685	0.00280408	0.132844	1.49032e-05	0.0112767	0.408167	0.489217	0.512947	0.282486	0.000117938	0.0603339	0.422754	0.842933	0.397108	0.102124	0.715055	0.384459	0.151718	0.664808	0.146328	0.716575	0.631772
3-(8,11,14-Pentadecatrienyl)phenol	4.28276e-12	3.4381e-15	0.263342	0.00765684	6.65626e-11	0.023098	0	0.244393	0.547802	0.000409964	0.155378	0.681211	0.655911	0.000166574	0.776992	0.568223	0.20565	0.663041	0.589856	3.35964e-05	0.63481	0.829407	0.619544	5.28553e-06	0.475893	0.292	5.89269e-05	0.401294	6.20369e-05	0.000734606	8.68388e-05	9.92568e-34	0.00552477	0.838928	0.213675	0.445647	0.000164825	4.57167e-05	0.000187043	0.870423	0.0331871	0.340407	0.499942	1.06061e-05	0.251969	0.561139	0.0342918	0.472698	0.196078
Fischeroside A	0.714938	0.434576	0.962767	0.738995	0.79593	0.13367	0.244393	0	0.750252	0.670368	0.366406	0.114634	0.11053	0.609928	0.468104	0.594448	0.0227487	0.711835	0.146683	0.197896	0.886301	0.166431	0.359927	0.0473393	0.330007	0.267303	0.418462	0.111331	0.0743778	0.201281	0.362926	0.270263	0.171781	0.543568	0.401631	0.449472	0.121222	0.144911	0.180117	0.208333	0.243569	0.137098	0.410399	0.169508	0.3393	0.693274	0.826395	0.797478	0.0747478
2-Keto-D-Gluconic acid	0.63205	0.900419	0.665309	0.646244	0.192567	0.50375	0.547802	0.750252	0	0.885446	0.723798	0.084648	0.868781	0.994152	0.752925	0.979184	0.593022	0.452955	0.435932	0.587406	0.503283	0.85926	0.00262859	0.690243	0.604903	0.394369	0.928833	0.0123108	0.95715	0.342419	0.78583	0.584015	0.860142	0.0188738	0.00128865	0.780694	0.438683	0.453108	0.742848	0.726142	0.661736	0.410009	3.1756e-10	0.895054	0.637911	0.96336	0.858353	0.393397	0.851175
1,4-diamino-2,3-dicyano-1,4-bis(phenylthio)butadiene	0.00255063	1.05565e-06	0.599273	0.688075	0.00621985	0.987773	0.000409964	0.670368	0.885446	0	0.187465	0.682665	0.905549	2.7086e-28	0.658929	0.70363	0.899444	0.998395	0.748627	0.900224	0.990652	0.700397	0.573305	0.000615081	0.66381	0.939983	0.59252	0.817676	0.157829	0.97327	0.199924	0.0013605	0.576669	0.705194	0.882032	0.956888	0.0425324	0.647392	0.275684	0.715158	0.103358	0.646959	0.76436	0.000397641	0.778518	0.449073	0.583376	0.758204	0.113704
7-Ketolithocholic acid	0.0418692	0.343023	0.017733	0.654036	0.0234982	0.88213	0.155378	0.366406	0.723798	0.187465	0	0.55344	0.879873	0.208444	0.465607	0.822524	0.260307	0.536173	0.873268	0.606148	0.168703	0.108711	0.996481	0.286973	0.0999283	0.703021	0.714806	0.21765	0.517648	0.685813	0.716035	0.121986	0.368395	0.619286	0.00931881	0.073722	0.508553	0.759571	0.457021	0.186094	0.274515	0.349612	0.861053	0.796042	0.115113	0.879432	0.733805	0.0345376	0.0667324
Revandchinone 1	0.871215	0.94494	0.148087	0.859796	0.810106	0.853428	0.681211	0.114634	0.084648	0.682665	0.55344	0	0.889586	0.788004	0.143122	0.41595	0.756306	0.824225	0.953781	0.298605	0.263567	0.805913	0.751172	0.149126	0.0172426	0.00988858	0.827619	0.198308	0.041991	0.0338382	0.414748	0.565023	0.879612	0.28009	0.371616	0.613245	0.823606	0.121466	0.9044	0.253229	0.7812	0.1664	0.402571	0.10891	0.520184	0.147584	0.416005	0.760078	0.89135
Indole-3-acetyl-L-aspartic acid	0.708782	0.801645	0.841729	0.371079	0.811019	0.389789	0.655911	0.11053	0.868781	0.905549	0.879873	0.889586	0	0.851518	0.733463	0.307512	0.974382	0.745219	0.534171	0.974547	0.00122112	0.21821	0.0129365	0.788344	0.208746	0.659599	0.227646	0.334202	0.894458	0.57483	0.232413	0.55617	0.858388	0.552139	0.545475	0.794585	0.874266	0.615119	0.978775	0.682493	0.00780769	0.357744	0.843646	0.467066	0.919192	0.00132325	0.00952709	0.0107302	0.302275
Versicolorone	0.000754802	7.50527e-07	0.558818	0.951087	0.00418933	0.973079	0.000166574	0.609928	0.994152	2.7086e-28	0.208444	0.788004	0.851518	0	0.67825	0.999715	0.935393	0.938951	0.758722	0.933243	0.952266	0.867913	0.482283	0.000386988	0.780118	0.702947	0.301854	0.721805	0.135313	0.983111	0.167993	0.000685446	0.565187	0.859312	0.681283	0.859668	0.0446775	0.740792	0.0852461	0.95336	0.132848	0.429323	0.995508	0.000294665	0.721535	0.523776	0.360353	0.685281	0.0761427
Topsentisterol C3	0.360724	0.336215	0.555276	0.454188	0.373159	0.185998	0.776992	0.468104	0.752925	0.658929	0.465607	0.143122	0.733463	0.67825	0	0.211007	0.302321	1.18254e-10	0.894717	0.701978	0.625881	0.692798	0.176087	0.765417	0.441766	0.729327	0.819533	0.565998	0.971968	0.596272	0.897919	0.587201	0.674135	0.802114	0.975054	0.763166	0.858772	0.764333	0.984895	0.998885	0.175417	0.454871	0.889943	0.945258	0.742044	0.310177	0.23757	0.444773	0.711677
(9Z,12Z)-3-hydroxyhexadecadienoylcarnitine	0.23468	0.782989	0.469029	0.021252	0.555845	0.361587	0.568223	0.594448	0.979184	0.70363	0.822524	0.41595	0.307512	0.999715	0.211007	0	0.149414	0.0744998	0.32127	0.681472	0.01285	0.630195	0.808539	0.510613	0.628846	0.87495	0.433557	0.987162	0.945841	0.540584	0.83391	0.697391	0.436166	0.759912	0.840833	0.869042	0.652332	0.397335	0.582308	0.851654	0.268119	0.99184	0.625053	0.738238	0.665347	0.0513826	0.00180626	0.326968	0.570329
3,4-Bis(trifluoromethyl)-1H-pyrazole	0.000975273	0.648869	0.00298358	0.0137338	0.00331522	0.0077102	0.20565	0.0227487	0.593022	0.899444	0.260307	0.756306	0.974382	0.935393	0.302321	0.149414	0	0.20088	0.621313	0.449801	0.487786	0.0127426	0.371622	0.654467	0.423096	0.771019	0.508302	0.0166035	0.301133	0.362461	0.280741	0.15115	0.888707	0.802319	0.00169483	0.412892	0.545745	0.39274	0.808515	0.662623	0.263526	0.914837	0.812244	0.51312	0.313591	0.800522	0.105306	0.0267711	0.914852
Cucurbitacin E	0.491203	0.423773	0.450895	0.284214	0.416001	0.193161	0.663041	0.711835	0.452955	0.998395	0.536173	0.824225	0.745219	0.938951	1.18254e-10	0.0744998	0.20088	0	0.319458	0.482955	0.41419	0.277612	0.129031	0.462166	0.934952	0.597539	0.483667	0.491062	0.956602	0.534055	0.971361	0.521744	0.584399	0.581529	0.774283	0.92005	0.518647	0.863646	0.761445	0.785471	0.0849586	0.94114	0.65447	0.996995	0.720517	0.819703	0.229233	0.498233	0.764234
Aloesin	0.725293	0.475608	0.650351	0.555551	0.744078	0.990625	0.589856	0.146683	0.435932	0.748627	0.873268	0.953781	0.534171	0.758722	0.894717	0.32127	0.621313	0.319458	0	0.920758	0.0888781	0.356235	0.324319	0.489699	0.439288	0.837857	0.954675	0.540162	0.162082	0.944558	0.605939	0.475564	0.325474	0.0422695	0.643262	0.853705	0.48081	0.632933	0.953368	0.000321838	0.878011	0.234793	0.0267012	0.712465	0.412904	0.0963743	0.461356	0.552075	0.958377
risperidone	0.0741223	0.000414517	0.90823	0.0237304	0.0489309	0.107339	3.35964e-05	0.197896	0.587406	0.900224	0.606148	0.298605	0.974547	0.933243	0.701978	0.681472	0.449801	0.482955	0.920758	0	0.482056	0.993842	0.483826	0.000519937	0.696725	0.117156	8.6722e-07	0.343493	0.0001145	8.48032e-10	0.000161678	1.50566e-05	6.71632e-09	0.63402	0.602021	0.817226	0.00161425	7.64316e-16	0.0525304	0.638173	0.0505317	0.191713	0.436344	0.000444147	0.737962	0.323895	0.179919	0.665226	0.946781
1-(3-Methylbenzoyl)-1H-indazole-3-carbonitrile	0.843638	0.313722	0.400866	0.541758	0.884854	0.728335	0.63481	0.886301	0.503283	0.990652	0.168703	0.263567	0.00122112	0.952266	0.625881	0.01285	0.487786	0.41419	0.0888781	0.482056	0	0.78339	0.867476	0.614753	0.43255	0.881966	0.832068	0.0380148	0.959821	0.246903	0.833968	0.634458	0.88755	0.102366	0.25519	0.480391	0.536422	0.187577	0.957914	0.284133	0.0913769	0.863143	0.23743	0.269784	0.452981	0.0951208	0.118699	0.0133944	0.420962
Malyngamide R	0.413295	0.7614	0.229682	0.314964	0.209788	0.922988	0.829407	0.166431	0.85926	0.700397	0.108711	0.805913	0.21821	0.867913	0.692798	0.630195	0.0127426	0.277612	0.356235	0.993842	0.78339	0	0.880928	0.87763	0.681293	0.633035	0.729819	0.152864	0.629881	0.601263	0.382588	0.843472	0.783421	0.53368	0.026857	0.706286	0.670716	0.648461	0.542735	0.0569243	0.552414	0.431063	0.518374	0.449114	0.870483	0.243998	0.29349	0.0655862	0.511994
D-Gluconic Acid	0.168387	0.335429	0.934982	0.372354	0.326582	0.674824	0.619544	0.359927	0.00262859	0.573305	0.996481	0.751172	0.0129365	0.482283	0.176087	0.808539	0.371622	0.129031	0.324319	0.483826	0.867476	0.880928	0	0.361931	0.987598	0.799809	0.90171	0.0673225	0.858959	0.226363	0.588533	0.551244	0.597103	0.000553782	0.467267	0.717932	0.563646	0.415429	0.317002	0.449342	0.0461716	0.63423	0.0048609	0.998081	0.47217	0.295157	0.502579	0.0598487	0.308213
PS(20:0/14:1(9Z))	0.00104043	7.33942e-06	0.0863303	0.0526446	0.00423091	0.0117927	5.28553e-06	0.0473393	0.690243	0.000615081	0.286973	0.149126	0.788344	0.000386988	0.765417	0.510613	0.654467	0.462166	0.489699	0.000519937	0.614753	0.87763	0.361931	0	0.57401	0.459054	0.0815105	0.374534	5.2407e-10	0.000530855	0.000776532	4.09424e-06	0.101479	0.514743	0.763919	0.46484	2e-07	6.75009e-06	0.0557121	0.928584	0.300936	0.0256096	0.364074	1.25389e-07	0.302769	0.396375	0.209886	0.957331	0.550142
Vitexin 7-O-sulfate	0.585801	0.470237	0.596558	0.677538	0.44228	0.104706	0.475893	0.330007	0.604903	0.66381	0.0999283	0.0172426	0.208746	0.780118	0.441766	0.628846	0.423096	0.934952	0.439288	0.696725	0.43255	0.681293	0.987598	0.57401	0	0.655133	0.591885	0.829666	0.515659	0.39231	0.786548	0.414048	0.513376	0.798719	0.817806	0.611794	0.556692	0.391743	0.817292	0.132851	0.977627	0.979799	0.397188	0.228988	0.481937	0.0563181	0.695694	0.706929	0.466118
5-Doxyl	0.250038	0.417951	0.548803	0.995432	0.26521	0.408814	0.292	0.267303	0.394369	0.939983	0.703021	0.00988858	0.659599	0.702947	0.729327	0.87495	0.771019	0.597539	0.837857	0.117156	0.881966	0.633035	0.799809	0.459054	0.655133	0	0.012446	0.0369252	0.403983	0.411044	0.620032	0.200261	0.234994	0.567934	0.330656	0.712801	0.485106	0.191919	0.113212	0.922599	0.883108	0.157329	0.711709	0.382486	0.733449	0.532912	0.384351	0.743502	0.723351
Gibberellin A32	0.00979303	0.00309588	0.614478	0.0556316	0.0240159	0.532918	5.89269e-05	0.418462	0.928833	0.59252	0.714806	0.827619	0.227646	0.301854	0.819533	0.433557	0.508302	0.483667	0.954675	8.6722e-07	0.832068	0.729819	0.90171	0.0815105	0.591885	0.012446	0	0.372428	0.0258885	0.00516608	0.00055893	6.55953e-05	4.32776e-05	0.362785	0.668495	0.694941	0.0283543	0.000591911	1.61085e-07	0.974049	0.140478	0.457126	0.270037	0.010165	0.615065	0.452253	0.262025	0.433568	0.817846
N5-Acetyl-N2-gamma-L-glutamyl-L-ornithine	0.604581	0.383452	0.0211179	0.523628	0.762552	0.56685	0.401294	0.111331	0.0123108	0.817676	0.21765	0.198308	0.334202	0.721805	0.565998	0.987162	0.0166035	0.491062	0.540162	0.343493	0.0380148	0.152864	0.0673225	0.374534	0.829666	0.0369252	0.372428	0	0.726923	0.55667	0.306127	0.45739	0.360965	0.0353965	0.000188932	0.256285	0.302147	0.452785	0.394048	0.980667	0.741568	0.422596	0.00996287	0.369819	0.219864	0.574141	0.610687	0.236527	0.859908
Ciprostene	0.00311118	0.000681246	0.0901341	0.00017592	0.00295573	0.00280408	6.20369e-05	0.0743778	0.95715	0.157829	0.517648	0.041991	0.894458	0.135313	0.971968	0.945841	0.301133	0.956602	0.162082	0.0001145	0.959821	0.629881	0.858959	5.2407e-10	0.515659	0.403983	0.0258885	0.726923	0	8.24026e-05	0.000175192	1.44427e-05	0.0513025	0.241621	0.878416	0.85678	6.4516e-09	1.98663e-06	0.0570351	0.714022	0.124391	0.0445471	0.419948	2.21955e-06	0.419751	0.033497	0.138964	0.628909	0.937663
2-Nonadecanone	0.0728459	0.000408231	0.868834	0.208068	0.0593073	0.132844	0.000734606	0.201281	0.342419	0.97327	0.685813	0.0338382	0.57483	0.983111	0.596272	0.540584	0.362461	0.534055	0.944558	8.48032e-10	0.246903	0.601263	0.226363	0.000530855	0.39231	0.411044	0.00516608	0.55667	8.24026e-05	0	0.116891	0.000273534	0.00610861	0.814804	0.422832	0.982436	0.0364229	2.71698e-18	0.187708	0.799282	0.574078	0.285845	0.525388	4.36253e-07	0.945025	0.456431	0.648517	0.325547	0.814835
PA(14:0(3-OH)/17:0cycw7)	0.00221794	0.000976955	0.943523	0.000336938	0.000255128	1.49032e-05	8.68388e-05	0.362926	0.78583	0.199924	0.716035	0.414748	0.232413	0.167993	0.897919	0.83391	0.280741	0.971361	0.605939	0.000161678	0.833968	0.382588	0.588533	0.000776532	0.786548	0.620032	0.00055893	0.306127	0.000175192	0.116891	0	7.03983e-05	0.00376284	0.236712	0.655123	0.738491	8.44478e-10	0.00538778	0.00680987	0.697766	0.0148713	0.0652721	0.61771	0.128814	0.522759	0.205037	0.0837426	0.195358	0.0620605
Tianshic acid methylester	5.22232e-12	2.62278e-14	0.239059	0.00543854	1.99755e-11	0.0112767	9.92568e-34	0.270263	0.584015	0.0013605	0.121986	0.565023	0.55617	0.000685446	0.587201	0.697391	0.15115	0.521744	0.475564	1.50566e-05	0.634458	0.843472	0.551244	4.09424e-06	0.414048	0.200261	6.55953e-05	0.45739	1.44427e-05	0.000273534	7.03983e-05	0	0.0054478	0.847377	0.212627	0.437958	6.80941e-05	1.30284e-05	0.000339826	0.950381	0.0457185	0.348339	0.418358	1.14552e-05	0.224207	0.581929	0.039777	0.452547	0.225706
Serinolamide A	0.284909	0.0556391	0.814438	0.0123761	0.342842	0.408167	0.00552477	0.171781	0.860142	0.576669	0.368395	0.879612	0.858388	0.565187	0.674135	0.436166	0.888707	0.584399	0.325474	6.71632e-09	0.88755	0.783421	0.597103	0.101479	0.513376	0.234994	4.32776e-05	0.360965	0.0513025	0.00610861	0.00376284	0.0054478	0	0.856715	0.43689	0.768503	0.0546724	0.0001138	0.291048	0.92583	0.00241641	0.160679	0.787762	0.282037	0.997478	0.498518	0.116719	0.676639	0.99124
3-FUROIC ACID	0.431185	0.54141	0.904823	0.20723	0.539624	0.489217	0.838928	0.543568	0.0188738	0.705194	0.619286	0.28009	0.552139	0.859312	0.802114	0.759912	0.802319	0.581529	0.0422695	0.63402	0.102366	0.53368	0.000553782	0.514743	0.798719	0.567934	0.362785	0.0353965	0.241621	0.814804	0.236712	0.847377	0.856715	0	0.969387	0.876321	0.161355	0.912259	0.43972	0.497269	0.179724	0.229015	0.00106835	0.805765	0.733314	0.342406	0.251924	0.467988	0.879029
Phaeofuran B	0.0518483	0.905604	0.00363649	0.643291	0.0236663	0.512947	0.213675	0.401631	0.00128865	0.882032	0.00931881	0.371616	0.545475	0.681283	0.975054	0.840833	0.00169483	0.774283	0.643262	0.602021	0.25519	0.026857	0.467267	0.763919	0.817806	0.330656	0.668495	0.000188932	0.878416	0.422832	0.655123	0.212627	0.43689	0.969387	0	0.763336	0.653381	0.37855	0.243025	0.491753	0.244958	0.837144	0.141415	0.381976	0.903341	0.814879	0.474905	0.375761	0.111436
Pyropheophorbide a	0.406696	0.680403	0.430961	0.446095	0.778196	0.282486	0.445647	0.449472	0.780694	0.956888	0.073722	0.613245	0.794585	0.859668	0.763166	0.869042	0.412892	0.92005	0.853705	0.817226	0.480391	0.706286	0.717932	0.46484	0.611794	0.712801	0.694941	0.256285	0.85678	0.982436	0.738491	0.437958	0.768503	0.876321	0.763336	0	0.491562	0.725318	0.76128	0.96664	0.521381	0.534012	0.844085	0.96725	7.51994e-21	0.903453	0.442639	0.307309	0.789841
Chaparrin	0.00440347	0.000388148	0.732579	0.00242653	0.000773542	0.000117938	0.000164825	0.121222	0.438683	0.0425324	0.508553	0.823606	0.874266	0.0446775	0.858772	0.652332	0.545745	0.518647	0.48081	0.00161425	0.536422	0.670716	0.563646	2e-07	0.556692	0.485106	0.0283543	0.302147	6.4516e-09	0.0364229	8.44478e-10	6.80941e-05	0.0546724	0.161355	0.653381	0.491562	0	0.000428447	0.0396259	0.963646	0.166654	0.0263486	0.521192	0.00447912	0.252641	0.162863	0.294832	0.829065	0.614506
FAHFA 36:1	0.0417868	5.24338e-05	0.889576	0.104883	0.0231257	0.0603339	4.57167e-05	0.144911	0.453108	0.647392	0.759571	0.121466	0.615119	0.740792	0.764333	0.397335	0.39274	0.863646	0.632933	7.64316e-16	0.187577	0.648461	0.415429	6.75009e-06	0.391743	0.191919	0.000591911	0.452785	1.98663e-06	2.71698e-18	0.00538778	1.30284e-05	0.0001138	0.912259	0.37855	0.725318	0.000428447	0	0.13503	0.335273	0.270711	0.202989	0.553869	1.1197e-06	0.571748	0.403645	0.421907	0.402753	0.796108
Ailanquassin A	0.00271071	0.00904391	0.960325	0.463378	0.0168617	0.422754	0.000187043	0.180117	0.742848	0.275684	0.457021	0.9044	0.978775	0.0852461	0.984895	0.582308	0.808515	0.761445	0.953368	0.0525304	0.957914	0.542735	0.317002	0.0557121	0.817292	0.113212	1.61085e-07	0.394048	0.0570351	0.187708	0.00680987	0.000339826	0.291048	0.43972	0.243025	0.76128	0.0396259	0.13503	0	0.0671183	0.692771	0.354138	0.274873	0.0142958	0.615513	0.742495	0.919402	0.338554	0.271703
Diethyl sulfate	0.57902	0.557635	0.955089	0.999211	0.943256	0.842933	0.870423	0.208333	0.726142	0.715158	0.186094	0.253229	0.682493	0.95336	0.998885	0.851654	0.662623	0.785471	0.000321838	0.638173	0.284133	0.0569243	0.449342	0.928584	0.132851	0.922599	0.974049	0.980667	0.714022	0.799282	0.697766	0.950381	0.92583	0.497269	0.491753	0.96664	0.963646	0.335273	0.0671183	0	0.23874	0.18913	0.890941	0.615914	0.508019	0.538032	0.207547	0.390067	0.0788015
LysoPS(18:1(9Z)/0:0)	0.031487	0.00694928	0.790513	0.00153113	0.0958667	0.397108	0.0331871	0.243569	0.661736	0.103358	0.274515	0.7812	0.00780769	0.132848	0.175417	0.268119	0.263526	0.0849586	0.878011	0.0505317	0.0913769	0.552414	0.0461716	0.300936	0.977627	0.883108	0.140478	0.741568	0.124391	0.574078	0.0148713	0.0457185	0.00241641	0.179724	0.244958	0.521381	0.166654	0.270711	0.692771	0.23874	0	0.37053	0.989694	0.337243	0.688238	0.276867	0.00482616	0.285508	0.718649
Hydrangea glucoside B	0.462646	0.348736	0.292129	0.167913	0.438244	0.102124	0.340407	0.137098	0.410009	0.646959	0.349612	0.1664	0.357744	0.429323	0.454871	0.99184	0.914837	0.94114	0.234793	0.191713	0.863143	0.431063	0.63423	0.0256096	0.979799	0.157329	0.457126	0.422596	0.0445471	0.285845	0.0652721	0.348339	0.160679	0.229015	0.837144	0.534012	0.0263486	0.202989	0.354138	0.18913	0.37053	0	0.488534	0.372156	0.674867	0.225558	0.198311	0.691715	0.549045
Ferulic acid 4-sulfate	0.702961	0.570412	0.832205	0.382639	0.859408	0.715055	0.499942	0.410399	3.1756e-10	0.76436	0.861053	0.402571	0.843646	0.995508	0.889943	0.625053	0.812244	0.65447	0.0267012	0.436344	0.23743	0.518374	0.0048609	0.364074	0.397188	0.711709	0.270037	0.00996287	0.419948	0.525388	0.61771	0.418358	0.787762	0.00106835	0.141415	0.844085	0.521192	0.553869	0.274873	0.890941	0.989694	0.488534	0	0.46413	0.790429	0.362211	0.311522	0.506579	0.959024
[7]-Gingerol	0.00175795	1.41554e-07	0.732238	0.369463	0.0145389	0.384459	1.06061e-05	0.169508	0.895054	0.000397641	0.796042	0.10891	0.467066	0.000294665	0.945258	0.738238	0.51312	0.996995	0.712465	0.000444147	0.269784	0.449114	0.998081	1.25389e-07	0.228988	0.382486	0.010165	0.369819	2.21955e-06	4.36253e-07	0.128814	1.14552e-05	0.282037	0.805765	0.381976	0.96725	0.00447912	1.1197e-06	0.0142958	0.615914	0.337243	0.372156	0.46413	0	0.768123	0.960739	0.932864	0.730798	0.688974
7,8,3',4',5'-Pentamethoxy-6'',6''-dimethylpyrano[2'',3'':5,6]flavone	0.291095	0.582119	0.53801	0.344174	0.408506	0.151718	0.251969	0.3393	0.637911	0.778518	0.115113	0.520184	0.919192	0.721535	0.742044	0.665347	0.313591	0.720517	0.412904	0.737962	0.452981	0.870483	0.47217	0.302769	0.481937	0.733449	0.615065	0.219864	0.419751	0.945025	0.522759	0.224207	0.997478	0.733314	0.903341	7.51994e-21	0.252641	0.571748	0.615513	0.508019	0.688238	0.674867	0.790429	0.768123	0	0.604215	0.397177	0.281297	0.772051
5beta-Cholanic acid	0.645589	0.953926	0.285352	0.126331	0.471917	0.664808	0.561139	0.693274	0.96336	0.449073	0.879432	0.147584	0.00132325	0.523776	0.310177	0.0513826	0.800522	0.819703	0.0963743	0.323895	0.0951208	0.243998	0.295157	0.396375	0.0563181	0.532912	0.452253	0.574141	0.033497	0.456431	0.205037	0.581929	0.498518	0.342406	0.814879	0.903453	0.162863	0.403645	0.742495	0.538032	0.276867	0.225558	0.362211	0.960739	0.604215	0	0.0772773	0.0629875	0.62439
Melophlin E	0.0277672	0.0558946	0.10936	2.73841e-06	0.0867696	0.146328	0.0342918	0.826395	0.858353	0.583376	0.733805	0.416005	0.00952709	0.360353	0.23757	0.00180626	0.105306	0.229233	0.461356	0.179919	0.118699	0.29349	0.502579	0.209886	0.695694	0.384351	0.262025	0.610687	0.138964	0.648517	0.0837426	0.039777	0.116719	0.251924	0.474905	0.442639	0.294832	0.421907	0.919402	0.207547	0.00482616	0.198311	0.311522	0.932864	0.397177	0.0772773	0	0.161922	0.941748
Cyrmenin A	0.0276261	0.738051	0.231613	0.791766	0.0691762	0.716575	0.472698	0.797478	0.393397	0.758204	0.0345376	0.760078	0.0107302	0.685281	0.444773	0.326968	0.0267711	0.498233	0.552075	0.665226	0.0133944	0.0655862	0.0598487	0.957331	0.706929	0.743502	0.433568	0.236527	0.628909	0.325547	0.195358	0.452547	0.676639	0.467988	0.375761	0.307309	0.829065	0.402753	0.338554	0.390067	0.285508	0.691715	0.506579	0.730798	0.281297	0.0629875	0.161922	0	0.299361
N5-Dinitrophenyl-L-ornithine methyl ester	0.261193	0.223484	0.79447	0.829998	0.18131	0.631772	0.196078	0.0747478	0.851175	0.113704	0.0667324	0.89135	0.302275	0.0761427	0.711677	0.570329	0.914852	0.764234	0.958377	0.946781	0.420962	0.511994	0.308213	0.550142	0.466118	0.723351	0.817846	0.859908	0.937663	0.814835	0.0620605	0.225706	0.99124	0.879029	0.111436	0.789841	0.614506	0.796108	0.271703	0.0788015	0.718649	0.549045	0.959024	0.688974	0.772051	0.62439	0.941748	0.299361	0
longirostrerone B	0.123118	0.0903041	0.00181052	0.132981	0.0638677	0.00647602	0.0326968	0.066136	0.913253	0.69427	0.605502	0.00100381	0.79503	0.615531	0.969336	0.58627	0.32689	0.64754	0.664078	0.0228758	0.712213	0.516545	0.397415	8.41725e-08	0.487578	0.997668	0.749334	0.538743	1.72026e-07	0.00346384	0.0268843	0.0163728	0.297348	0.64187	0.921041	0.350758	0.000555534	0.00141709	0.364181	0.469103	0.700064	0.0418773	0.528868	0.00646266	0.235103	0.0339465	0.680002	0.884861	0.88546
Garcinisidone B	0.676179	0.977307	0.00764236	0.850078	0.879019	0.522775	0.855948	0.349281	0.424842	0.672759	0.79215	0.957867	0.343856	0.679307	0.380217	0.323869	0.0783659	0.331346	0.113498	0.303185	0.571913	0.0241593	0.430486	0.550549	0.537619	0.775989	0.556929	0.0434235	0.737248	0.588362	0.963382	0.982647	0.00360312	0.735506	0.0982229	0.63122	0.399754	0.772866	0.439715	0.175502	0.0766208	0.276362	0.755295	0.537556	0.810827	0.425921	0.382081	0.549313	0.907107
Epipadmatin	0.361946	0.595	0.665832	0.885863	0.631654	0.775966	0.77812	0.607133	0.996663	0.976668	0.80771	0.853928	0.105943	0.657882	0.495442	0.0290866	0.904393	0.253066	0.0601676	0.632361	0.0389648	0.93264	0.606912	0.732746	0.783807	0.590471	0.503435	0.078673	0.375856	0.438179	0.365258	0.825794	0.780279	0.036569	0.790712	0.900385	0.155407	0.872013	0.440389	0.563687	0.513095	0.155639	0.833075	0.762857	0.678674	0.558898	0.228728	0.447651	0.763075
Citric Acid	0.12411	0.0196884	0.787979	0.854443	0.29703	0.658675	0.0739823	0.368755	0.547884	0.477481	0.664648	0.140581	0.29341	0.541789	0.823268	0.806468	0.5976	0.857021	0.910903	0.327786	0.411747	0.618939	0.000149098	0.404378	0.674983	0.977522	0.927545	0.931655	0.480771	0.0705687	0.923057	0.0749678	0.207357	1.76699e-06	0.418416	0.512865	0.796827	0.147916	0.852854	0.633067	0.0474247	0.463712	0.293935	0.226265	0.934826	0.46518	0.751777	0.481115	0.215152
Andrastin C	0.00294882	0.389424	0.327804	0.643112	0.00375176	0.257554	0.127245	0.600805	0.899052	0.435956	0.000184121	0.569821	0.906652	0.422191	0.895085	0.507538	0.0010122	0.518883	0.889911	0.889797	0.895663	0.138979	0.319514	0.246558	0.340429	0.527059	0.836444	0.21381	0.436012	0.643196	0.174866	0.0803733	0.606827	0.645288	0.0870212	0.673501	0.427709	0.874837	0.410763	0.38377	0.671261	0.45152	0.789997	0.633505	0.945556	0.8058	0.989505	0.00131481	0.018367
Myo-inositol glutamate	0.991036	0.396303	0.182772	0.532655	0.710463	0.77367	0.87698	0.359788	3.72437e-08	0.974582	0.955028	0.251955	0.874645	0.932481	0.815774	0.628527	0.231302	0.418635	0.0125125	0.486745	0.164083	0.829407	0.052363	0.649843	0.540638	0.739097	0.421185	0.119685	0.436468	0.753683	0.406073	0.774654	0.384101	0.00492752	0.0346654	0.62851	0.210355	0.438406	0.520204	0.0815954	0.911245	0.106181	5.23486e-07	0.376151	0.928696	0.928167	0.59718	0.437417	0.529605
Pretoxin	0.0207143	0.00276767	0.533223	0.0519911	0.0398926	0.626162	6.07331e-05	0.464407	0.901121	0.404765	0.676866	0.954226	0.281141	0.230248	0.986463	0.708163	0.439038	0.635913	0.919868	2.41244e-07	0.756122	0.799973	0.992739	0.0765445	0.636826	0.0284514	1.62012e-27	0.332224	0.0422662	0.00887622	0.000281639	7.64539e-05	6.10145e-06	0.331286	0.825868	0.600209	0.0217627	0.000585591	1.16053e-05	0.879318	0.0735859	0.595584	0.228268	0.0226466	0.530894	0.517562	0.238579	0.577631	0.868034
GLYCERATE	0.223082	0.547882	0.141367	0.26912	0.100435	0.397655	0.814086	0.893663	0.551909	0.488648	0.000779422	0.326491	0.204861	0.548168	0.942891	0.886999	0.00972675	0.525519	0.626674	0.47227	0.258559	0.0155457	0.054286	0.678125	0.68085	0.4158	0.78495	0.661876	0.550083	0.417685	0.411922	0.71145	0.25407	0.893342	0.0189724	0.16602	0.899449	0.209604	0.795193	0.0597958	0.602063	0.844463	0.855033	0.568501	0.235785	0.0393075	0.924921	0.00797593	0.0988671
Kaurenoic acid	0.576562	0.873411	0.433208	0.625444	0.25002	0.000437417	0.788482	0.277483	0.661003	0.703965	0.497285	0.495797	0.887437	0.801485	0.812527	0.333983	0.143299	0.607893	0.229923	0.61303	0.509805	0.00592434	0.465544	0.035219	0.525372	0.770733	0.587694	0.49184	0.304241	0.707872	0.0238233	0.718651	0.777297	0.331372	0.571072	0.75074	0.0898143	0.505569	0.760058	0.315562	0.299677	0.471325	0.525863	0.904317	0.811725	0.785233	0.899226	0.511986	0.280463
Terpendole I	0.849993	0.389285	0.690917	0.65727	0.763572	0.833773	0.907916	0.277173	0.996117	0.930457	0.947006	0.114162	0.352994	0.934973	0.603273	0.617071	0.268777	0.798691	0.66444	0.233164	0.858391	0.500988	0.202281	0.165734	0.190414	0.000280563	0.734518	0.076008	0.316018	0.14758	0.855307	0.929825	0.681386	0.103176	0.145851	0.666854	0.289921	0.0746306	0.70195	0.34393	0.429634	0.0899879	0.199946	0.256467	0.270926	0.710589	0.580037	0.664462	0.441975
Vladimuliecin B	0.440842	0.212867	0.0102015	0.650168	0.512159	0.963028	0.202957	0.556597	0.0545718	0.575421	0.560382	0.553724	0.352109	0.737062	0.709372	0.199178	0.784908	0.4831	0.136692	0.0895784	0.0416219	0.744925	0.195921	0.0642595	0.96933	0.187435	0.805858	0.139535	0.104824	0.0388529	0.637047	0.241555	0.0719675	0.0342547	0.67193	0.972764	0.241538	0.0361047	0.560336	0.516971	0.206021	0.0836031	0.0580161	0.190411	0.698973	0.138536	0.694762	0.504122	0.97393
Kosamol A	0.0413179	0.797426	0.575983	0.851198	0.0811364	0.875151	0.613188	0.120756	0.862529	0.994371	0.00527972	0.482741	0.990117	0.963427	0.978628	0.903348	0.000106796	0.624316	0.958309	0.548005	0.935286	0.0704314	0.479673	0.701481	0.36105	0.504611	0.921326	0.127253	0.873823	0.441176	0.909403	0.494128	0.451972	0.70218	0.124329	0.649272	0.834591	0.543132	0.958381	0.514745	0.460715	0.796701	0.756967	0.898287	0.828186	0.698118	0.668059	0.0105837	0.442041
2-Docosanamidoacetic acid	0.122905	0.0656488	0.552817	2.60603e-05	0.0745389	0.0542354	0.00179934	0.145202	0.668769	0.58849	0.567503	0.7606	0.310987	0.67037	0.679462	0.188401	0.538036	0.222336	0.615122	5.69289e-06	0.243645	0.604079	0.630868	0.0367405	0.999116	0.521405	0.000256228	0.192335	0.00046884	0.0390526	0.000234194	0.000903961	1.04787e-09	0.563526	0.770964	0.466562	0.00495542	0.00256222	0.16496	0.693603	0.00042568	0.0817786	0.254904	0.348005	0.393587	0.00354151	0.0124707	0.757195	0.892239
N-Palmitoyl Glutamine	0.1196	0.885999	0.584682	0.00248374	0.208011	0.192542	0.654662	0.887457	0.689082	0.414854	0.68904	0.857384	0.181135	0.484879	0.520401	0.00458751	0.0178846	0.200411	0.750897	0.366588	0.209462	0.346851	0.0516061	0.348459	0.554419	0.569003	0.322049	0.776187	0.831544	0.433847	0.839219	0.772759	0.834721	0.513876	0.759334	0.893728	0.479938	0.237299	0.230928	0.941223	0.00547381	0.720681	0.479768	0.348633	0.95993	0.0280372	0.00875116	0.0552301	0.576471
N-Demethylricinine	0.357707	0.870662	0.00272025	0.784281	0.296524	0.662262	0.257117	0.632164	0.414199	0.715786	0.0108977	0.403022	0.738455	0.740492	0.638028	0.238777	0.0690855	0.61545	0.397799	0.756801	0.303731	0.0802399	0.57919	0.735434	0.367071	0.885847	0.882898	0.144575	0.402564	0.68921	0.825585	0.189428	0.407406	0.504128	0.00589357	0.324103	0.323508	0.838235	0.431061	0.542972	0.877797	0.613847	0.469281	0.799014	0.509657	0.841142	0.525897	0.104613	0.401093
Deoxycholic acid	0.299016	0.0869112	0.0125366	0.720701	0.382906	0.88221	0.119228	0.491028	0.0810338	0.381953	0.642969	0.528787	0.336028	0.529366	0.724812	0.276256	0.967793	0.557447	0.19656	0.0516652	0.0806314	0.524007	0.171139	0.0273471	0.964726	0.288522	0.644083	0.146581	0.0563596	0.0203135	0.479775	0.145988	0.0639257	0.0305747	0.877941	0.971024	0.119536	0.013637	0.491972	0.76957	0.117425	0.0651496	0.0743868	0.0979216	0.776585	0.158189	0.63625	0.552652	0.897685
5-Fluorodeoxyuridine monophosphate	0.642478	0.475	0.00145456	0.271888	0.414826	0.309817	0.927736	0.852207	0.870265	0.733214	0.083325	0.565366	0.207133	0.705644	0.982588	0.341566	0.0305733	0.700312	0.619387	0.568518	0.00117649	0.23022	0.584389	0.487394	0.430015	0.258999	0.567604	0.171523	0.246865	0.565302	0.5621	0.855202	0.288549	0.707788	0.0581591	0.521284	0.858552	0.621394	0.451596	0.852732	0.288585	0.671773	0.822497	0.518489	0.383107	0.128542	0.263041	0.177088	0.314758
Octadecanedioic acid	0.0441225	0.0108355	0.240178	0.373357	0.0307655	1.16437e-05	0.0147667	0.110458	0.985527	0.0969261	0.981812	0.421634	0.554173	0.0822032	0.458189	0.200028	0.496898	0.687537	0.807858	0.0157021	0.396702	0.652767	0.351087	3.993e-07	0.218746	0.0609465	0.239938	0.968188	0.000877633	0.0046709	0.00174986	0.0084861	0.612774	0.327675	0.608969	0.733475	0.000765447	0.000895396	0.166388	0.604408	0.828865	0.201612	0.369697	0.00238891	0.505041	0.681347	0.823201	0.605658	0.372753
11-Deoxylandomycinone	0.93659	0.562746	0.409673	0.924804	0.746403	0.363561	0.723719	0.4931	0.650181	0.923903	0.345562	0.000717014	0.303269	0.934076	0.296585	0.942998	0.664442	0.989388	0.329323	0.808961	0.310765	0.687674	0.451753	0.57496	4.99515e-10	0.916384	0.463287	0.917363	0.881036	0.562587	0.720784	0.70793	0.466003	0.500932	0.771737	0.663616	0.802545	0.516741	0.864361	0.0850176	0.804229	0.373847	0.365953	0.452916	0.539709	0.0350231	0.709675	0.707916	0.921864
Urolithin C	0.194902	0.305812	0.873751	0.500484	0.213999	0.537922	0.0773649	0.219027	0.743333	0.551492	0.899617	0.534623	0.80349	0.943083	0.600302	0.0331552	0.733537	0.91374	0.244073	0.048308	0.962427	0.564716	0.392038	0.645447	0.257909	0.0263948	1.02637e-05	0.571712	0.492558	0.491175	0.0380868	0.0782873	0.0195386	0.634028	0.758395	0.365981	0.241568	0.313217	9.84649e-05	0.828843	0.739332	0.291491	0.763836	0.261485	0.271649	0.79426	0.97237	0.762369	0.647547
Heptadecanoic acid	0.0321315	0.0112453	0.956021	0.000368954	0.0324769	0.0479697	6.98956e-05	0.109706	0.707873	0.844198	0.657614	0.903961	0.50794	0.928542	0.751855	0.325782	0.708401	0.328251	0.712919	3.49686e-09	0.712988	0.612675	0.661341	0.0152896	0.890609	0.0765948	1.4722e-07	0.110541	0.00133953	0.0164707	1.89322e-05	5.07925e-05	2.24622e-09	0.265379	0.943539	0.51258	0.00220988	0.0003628	0.00236317	0.57741	0.0291903	0.22009	0.305212	0.0571571	0.490328	0.558808	0.124239	0.862605	0.961627
Semiplenamide G	0.105394	0.00980845	0.164749	0.808009	0.231234	0.982193	0.0692838	0.61287	0.122164	0.662941	0.803405	0.0557963	0.175459	0.573983	0.281818	0.940108	0.544644	0.384767	0.730572	0.0281727	0.809745	0.669157	0.0231103	0.0862636	0.72536	0.988078	0.208661	0.991036	0.103334	1.02022e-05	0.782304	0.0425118	0.391147	0.172634	0.771706	0.57711	0.868003	0.000700986	0.614074	0.802867	0.685938	0.174231	0.894301	0.00591131	0.673986	0.415648	0.0237239	0.250458	0.947047
Protoasukamycin	0.00170205	1.33884e-05	0.77267	0.0021701	0.00200875	0.0150437	3.25113e-06	0.469097	0.883036	0.0606258	0.706156	0.450821	0.930743	0.0717099	0.571972	0.390899	0.591848	0.68636	0.662102	1.74762e-09	0.520031	0.498559	0.500559	4.28941e-08	0.575277	0.268504	0.00020284	0.719964	9.60466e-11	1.24125e-06	2.15656e-06	5.09596e-07	0.000836913	0.543021	0.706692	0.420753	1.16246e-09	4.42557e-10	0.0405862	0.917978	0.0335519	0.0528343	0.424985	3.95191e-06	0.25173	0.190982	0.265746	0.587031	0.955802
2-(2-Aminoethyl)benzenesulfonyl fluoride	0.375249	0.900228	0.696814	0.712459	0.203934	0.91252	0.588356	0.428258	0.576982	0.842424	0.460541	0.00845256	0.0351995	0.67745	0.625293	0.910342	0.845634	0.850285	0.287038	0.952863	0.00124158	0.897528	0.986446	0.533419	0.117374	0.000192096	0.175052	0.0445329	0.515798	0.680387	0.483348	0.549025	0.856509	0.130428	0.112825	0.943701	0.978388	0.637941	0.206869	0.118799	0.594559	0.244171	0.956835	0.346157	0.968454	0.522803	0.829273	0.0933977	0.0631418
Atticin	0.517921	0.356929	0.72644	0.835479	0.635109	0.818122	0.403114	0.396374	0.591745	0.614923	0.192688	0.0725936	0.587598	0.714281	0.414898	0.194394	0.694147	0.683866	0.363798	0.79247	0.832042	0.512192	0.648855	0.997925	0.00011689	0.849041	0.463078	0.846658	0.966886	0.593427	0.838319	0.426526	0.375422	0.4418	0.993927	0.704267	0.928366	0.498961	0.833438	0.166557	0.699642	0.354089	0.375091	0.367723	0.567631	0.790155	0.711594	0.893828	0.773941
Ptilosteroid C	0.279363	0.433422	0.255823	0.0448324	0.139781	0.0304086	0.131672	0.00645971	0.783476	0.845756	0.183882	0.510792	0.55295	0.691982	0.395964	0.257205	0.549689	0.546728	0.853954	0.475541	0.944482	0.581166	0.614838	0.0185548	0.0792285	0.916211	0.470553	0.126718	0.000514141	0.522781	0.0638344	0.107011	0.408987	0.525541	0.661062	0.167172	0.000964125	0.360834	0.309743	0.603862	0.902503	0.017746	0.788453	0.12182	0.153099	0.0128583	0.720306	0.246254	0.976417
4'-Hydroxy-2',6'-dimethoxydihydrochalcone	0.234224	0.759928	0.56861	0.461042	0.203494	0.695542	0.180065	0.606914	0.893328	0.587043	0.222369	0.39489	0.52254	0.910494	0.619405	0.924785	0.238876	0.270455	0.00749325	0.0587783	0.980229	6.49464e-06	0.874319	0.67747	0.542106	0.16418	0.0255283	0.951598	0.923711	0.691797	0.134833	0.214705	0.0498329	0.947797	0.257953	0.675723	0.779914	0.483528	0.125686	0.00577457	0.86299	0.174714	0.677747	0.926427	0.910731	0.781876	0.577951	0.0956441	0.27177
Sterculic acid	0.0968195	0.00162865	0.250495	0.00289947	0.0706971	0.00171861	0.000646618	0.0873235	0.826153	0.701664	0.398936	0.375868	0.818254	0.822898	0.952291	0.97095	0.857724	0.968259	0.254717	3.79858e-09	0.360346	0.499641	0.93329	6.10167e-06	0.252285	0.580691	0.0112751	0.152134	2.79708e-07	1.80418e-06	0.000457412	0.00031181	6.88755e-05	0.16393	0.232862	0.461687	1.27156e-05	5.99155e-10	0.488943	0.0863589	0.0802368	0.0526749	0.268066	0.000205109	0.282616	0.161532	0.0345109	0.441558	0.692379
Coformycin	0.285675	0.445163	0.517262	0.96016	0.234722	0.396442	0.458924	0.661952	0.604145	0.803159	0.456347	0.945436	0.629136	0.71511	0.762909	0.5751	0.127569	0.899368	0.84931	0.669835	0.913233	0.606013	0.335071	0.569855	0.888759	0.639864	0.844799	0.489598	0.918799	0.657903	0.370556	0.461093	0.848777	0.427211	0.354509	0.888042	0.570824	0.623696	0.901641	0.832265	0.333495	0.0951362	0.641506	0.684423	0.823277	0.583982	0.35414	0.29009	0.651673
Europine N-oxide	0.327043	0.20737	0.411582	0.400136	0.604314	0.895268	0.0776437	0.00264593	0.0973359	0.624498	0.63683	0.53731	0.54109	0.366449	0.960829	0.780322	0.308367	0.878061	0.893663	0.223735	0.79468	0.610322	0.77932	0.132668	0.818872	0.445057	0.0519905	0.26739	0.163111	0.45723	0.155286	0.0678265	0.0918734	0.624455	0.958723	0.752048	0.224462	0.298076	0.156763	0.402305	0.793786	0.856798	0.116165	0.579399	0.967155	0.777465	0.374463	0.833043	0.00606978
beta-Aspartylaspartic acid	0.744231	0.982625	0.726636	0.569594	0.331691	0.551518	0.272358	0.862037	0.766356	0.822847	0.957313	0.677931	0.0031311	0.844883	0.653146	0.492161	0.438185	0.404749	0.448449	0.555137	0.143645	0.890161	0.00204411	0.486266	0.842001	0.655377	0.533237	0.112529	0.135395	0.598004	0.758444	0.246418	0.821713	0.00168543	0.4077	0.709799	0.266496	0.473363	0.41274	0.613986	0.107515	0.355764	0.00984975	0.334699	0.302097	0.903535	0.956504	0.652637	0.82718
Terrestrol C	0.762573	0.286713	0.396771	0.477344	0.811645	0.776531	0.560588	0.976182	0.585372	0.877834	0.198208	0.410224	0.00034189	0.853908	0.606474	0.0135136	0.50269	0.48545	0.144801	0.490138	3.29775e-36	0.806708	0.82333	0.56586	0.459042	0.649331	0.850716	0.0656106	0.940053	0.246876	0.694113	0.548073	0.83277	0.147284	0.279438	0.436213	0.567793	0.183054	0.966847	0.34492	0.0707997	0.82347	0.342119	0.236818	0.424814	0.0713221	0.0818183	0.015989	0.354192
7-Ketogedunin	0.566122	0.232471	0.51273	0.409933	0.164988	0.000749958	0.445202	0.250836	0.843336	0.66935	0.251621	0.0471293	0.49168	0.632257	0.508287	0.122301	0.970972	0.971078	0.354131	0.0171123	0.128242	0.543637	0.947646	0.0536595	0.309505	2.13757e-05	0.187144	0.917322	0.00374285	0.00489879	0.047526	0.245395	0.438533	0.439627	0.458975	0.589001	0.00203402	0.00113653	0.819184	0.219848	0.85358	0.141473	0.574671	0.0742631	0.341683	0.898113	0.561089	0.662484	0.541828
1,7-Dimethyluric acid	0.219337	0.236345	0.199682	0.231609	0.215583	0.814018	0.283354	0.953294	0.313652	0.663917	0.691101	0.235577	0.638035	0.581037	0.233396	0.263244	0.625043	0.0576186	0.149779	0.305873	0.826445	0.20851	0.951001	0.355138	0.913901	0.115732	0.758803	0.208385	0.117575	0.316132	0.410419	0.255885	0.230548	0.213427	0.717821	0.440344	0.408662	0.297767	0.702865	0.609006	0.105419	0.277857	0.264055	0.33935	0.259335	0.594085	0.328775	0.521947	0.000474762
D-Glucuronic acid	0.0198118	0.157034	0.763605	0.345029	0.188309	0.428557	0.284397	0.402228	0.522601	0.802307	0.965303	0.385434	0.79128	0.626801	0.415902	0.674114	0.0892065	0.369826	0.957819	0.50461	0.423223	0.690772	8.80631e-05	0.910129	0.968795	0.726565	0.677523	0.952338	0.489653	0.172656	0.975125	0.25185	0.775004	0.0318786	0.296886	0.834988	0.740303	0.360377	0.324319	0.966268	0.0563656	0.209041	0.401269	0.170679	0.995055	0.962903	0.825883	0.0366966	0.655305
Atractyloside G 2-O-beta-D-glucopyranoside	0.752755	0.626074	0.686395	0.372601	0.610503	0.413976	0.734919	0.783719	0.329694	0.763948	0.370228	0.918461	0.606273	0.888887	1.11835e-05	0.0424554	0.411744	4.71777e-17	0.168964	0.638283	0.174235	0.277234	0.166026	0.114848	0.830539	0.924518	0.374213	0.629954	0.378903	0.600736	0.820273	0.663853	0.690357	0.514164	0.497716	0.875563	0.126281	0.748613	0.673376	0.592344	0.129966	0.658586	0.705748	0.705415	0.622167	0.941799	0.201976	0.553769	0.745034
[truncated: 36 more columns]
