# Supplementary material
Source: Research Square preprint supplement (doi:10.21203/rs.3.rs-9632664/v1)
Supplement: Supplementary file 2 [file 50398913442001c5e787a239.xlsx]

## Sheet: CONTROL-vs-PE.all(1)
	logFC	se	pvalues	adjPvalues
c__Halobacteria;o__Halobacteriales	2.37519	1.15587	0.0398886	0.999213
c__Gammaproteobacteria;o__Orbales	1.7671	0.979068	0.071094	0.999213
c__Actinomycetes;o__Candidatus Nanopelagicales	-1.73813	1.18634	0.142887	0.999213
c__Neocallimastigomycetes;o__Neocallimastigales	1.66967	1.05456	0.113358	0.999213
c__Gammaproteobacteria;o__Cellvibrionales	1.62108	1.11733	0.146822	0.999213
c__Actinomycetes;o__Jiangellales	-1.53364	1.2538	0.22126	0.999213
c__Deferribacteres;o__Deferribacterales	1.48985	1.03759	0.15104	0.999213
c__Candidatus Cryosericia;o__Candidatus Cryosericales	1.34107	0.643322	0.0371048	0.999213
c__Thermoplasmata;o__Methanomassiliicoccales	1.291	0.586722	0.0277814	0.999213
c__Thermotogae;o__Kosmotogales	-1.28919	0.847228	0.128094	0.999213
c__Actinomycetes;o__Bifidobacteriales	-1.22815	1.77921	0.490017	0.999213
c__Candidatus Brocadiia;o__Candidatus Brocadiales	1.18049	1.20554	0.327474	0.999213
c__Calditrichia;o__Calditrichales	-1.15454	1.72277	0.502753	0.999213
c__Coriobacteriia;o__Coriobacteriales	-1.10427	1.89393	0.559854	0.999213
c__Kiritimatiellia;o__Kiritimatiellales	1.03042	0.852128	0.226575	0.999213
c__Coprothermobacteria;o__Coprothermobacterales	1.00844	0.802219	0.20873	0.999213
c__Archaeoglobi;o__Archaeoglobales	-0.997434	1.20399	0.40742	0.999213
c__Rubrobacteria;o__Rubrobacterales	0.955551	1.02682	0.352063	0.999213
c__Balneolia;o__Balneolales	-0.946764	0.857583	0.269597	0.999213
c__Caldilineae;o__Caldilineales	0.946421	1.04113	0.363331	0.999213
c__Agaricomycetes;o__Polyporales	-0.941655	0.511299	0.0655203	0.999213
c__Cyanophyceae;o__Chroococcales	-0.912852	0.539052	0.0903716	0.999213
c__Methanomicrobia;o__Methanotrichales	0.850455	1.15187	0.460316	0.999213
c__Planctomycetia;o__Pirellulales	0.848867	0.708112	0.230616	0.999213
c__Gammaproteobacteria;o__Pasteurellales	0.839774	1.96165	0.668582	0.999213
c__Desulfuribacillia;o__Desulfuribacillales	0.838637	0.839246	0.317662	0.999213
c__Sordariomycetes;o__Xylariales	-0.831134	0.436476	0.0568853	0.999213
c__Actinomycetes;o__Kineosporiales	-0.815657	0.76813	0.288293	0.999213
c__Syntrophia;o__Syntrophales	-0.811551	0.42647	0.0570474	0.999213
c__Holophagae;o__Thermotomaculales	0.791775	0.40376	0.0498786	0.999213
c__Gammaproteobacteria;o__Cardiobacteriales	0.790483	1.02	0.438349	0.999213
c__Chlamydiia;o__Chlamydiales	-0.782006	1.33617	0.558374	0.999213
c__Terriglobia;o__Terriglobales	-0.776304	0.608928	0.202355	0.999213
c__Saccharomycetes;o__Saccharomycetales	-0.773148	0.68485	0.258927	0.999213
c__Gammaproteobacteria;o__Methylococcales	0.763878	0.902114	0.397126	0.999213
c__Actinomycetes;o__Geodermatophilales	0.759964	0.709982	0.28444	0.999213
c__Thermoprotei;o__Thermoproteales	0.749983	1.32773	0.572169	0.999213
c__Eurotiomycetes;o__Eurotiales	-0.740238	0.372912	0.0471421	0.999213
c__Actinomycetes;o__Glycomycetales	-0.731114	1.48037	0.621397	0.999213
c__Verrucomicrobiae;o__Verrucomicrobiales	-0.704633	1.71413	0.681019	0.999213
c__Actinomycetes;o__Propionibacteriales	-0.698035	1.22116	0.567582	0.999213
c__Methanomicrobia;o__Methanomicrobiales	0.695723	0.556924	0.211583	0.999213
c__Clostridia;o__Monoglobales	0.693236	0.623128	0.265918	0.999213
c__Cyanophyceae;o__Pseudanabaenales	0.687861	1.15731	0.552271	0.999213
c__Deinococci;o__Deinococcales	-0.682188	1.10471	0.536889	0.999213
c__Opitutae;o__Puniceicoccales	0.682129	0.646026	0.291021	0.999213
c__Sordariomycetes;o__Magnaporthales	-0.666678	1.01607	0.511738	0.999213
c__Chlorobiia;o__Chlorobiales	0.663757	0.547818	0.225652	0.999213
c__Saprospiria;o__Saprospirales	0.657219	0.59604	0.270182	0.999213
c__Candidatus Saccharimonadia;o__Candidatus Nanosynbacterales	-0.643083	1.46421	0.660516	0.999213
c__Cyanophyceae;o__Nodosilineales	0.638125	1.46871	0.663939	0.999213
c__Glomeromycetes;o__Glomerales	0.63327	0.906565	0.48484	0.999213
c__Candidatus Nanoperiomorbia;o__Candidatus Nanoperiomorbales	-0.630429	1.45537	0.664887	0.999213
c__Thermodesulfobacteria;o__Thermodesulfobacteriales	0.62712	1.26546	0.620201	0.999213
c__Actinomycetes;o__Kitasatosporales	-0.623163	1.39539	0.655174	0.999213
c__Clostridia;o__Lutisporales	0.617414	1.47245	0.674989	0.999213
c__Agaricomycetes;o__Boletales	-0.6069	0.70908	0.392054	0.999213
c__Verrucomicrobiae;o__Limisphaerales	0.581634	0.417618	0.163698	0.999213
c__Gammaproteobacteria;o__Legionellales	-0.57081	1.37058	0.677063	0.999213
c__Deltaproteobacteria;o__Bradymonadales	0.570205	1.01033	0.572498	0.999213
c__Leotiomycetes;o__Erysiphales	-0.560599	1.09035	0.607151	0.999213
c__Clostridia;o__Koleobacterales	-0.560431	0.802029	0.484698	0.999213
c__Anaerolineae;o__Aggregatilineales	-0.537493	0.970844	0.579829	0.999213
c__Terriglobia;o__Bryobacterales	-0.533541	0.991103	0.590349	0.999213
c__Candidatus Nanosyncoccalia;o__Candidatus Nanogingivales	-0.531605	0.789646	0.500808	0.999213
c__Bdellovibrionia;o__Bdellovibrionales	0.523981	0.471933	0.266876	0.999213
c__Desulfuromonadia;o__Desulfuromonadales	0.523696	0.636479	0.410621	0.999213
c__Thermotogae;o__Thermotogales	0.516737	0.571338	0.365765	0.999213
c__Coriobacteriia;o__Eggerthellales	-0.514263	1.16604	0.659188	0.999213
c__Desulfuromonadia;o__Geobacterales	0.499873	0.641685	0.43598	0.999213
c__Methanobacteria;o__Methanobacteriales	0.496928	1.1427	0.663654	0.999213
c__Clostridia;o__Thermosediminibacterales	0.492986	1.58261	0.755419	0.999213
c__Negativicutes;o__Acidaminococcales	0.487355	1.91613	0.79923	0.999213
c__Actinomycetes;o__Micromonosporales	-0.485891	0.46319	0.294173	0.999213
c__Holophagae;o__Holophagales	0.485514	0.639117	0.447456	0.999213
c__Mollicutes;o__Mycoplasmatales	0.48235	1.01374	0.634207	0.999213
c__Deinococci;o__Thermales	0.476649	0.23766	0.0449001	0.999213
c__Actinomycetes;o__Streptosporangiales	0.468653	0.406092	0.248477	0.999213
c__Alphaproteobacteria;o__Hyphomicrobiales	-0.467304	1.14202	0.6824	0.999213
c__Fibrobacteria;o__Fibrobacterales	-0.467121	1.57093	0.766197	0.999213
c__Actinomycetes;o__Acidothermales	0.466811	0.965926	0.628898	0.999213
c__Actinomycetes;o__Actinomycetales	-0.465822	1.1442	0.683924	0.999213
c__Cyanophyceae;o__Leptolyngbyales	0.462744	1.19878	0.699488	0.999213
c__Methanococci;o__Methanococcales	-0.44857	0.7711	0.56075	0.999213
c__Zetaproteobacteria;o__Mariprofundales	0.445903	1.37939	0.746498	0.999213
c__Malgrandaviricetes;o__Petitvirales	0.441637	0.631896	0.48461	0.999213
c__Candidatus Nanosyncoccalia;o__Candidatus Nanosyncoccales	0.433141	0.516707	0.401878	0.999213
c__Planctomycetia;o__Planctomycetales	0.431527	0.639443	0.499772	0.999213
c__Gemmatimonadetes;o__Gemmatimonadales	-0.422979	0.900619	0.638603	0.999213
c__Gammaproteobacteria;o__Pseudomonadales	-0.422781	0.846919	0.617639	0.999213
c__Methanomicrobia;o__Methanosarcinales	0.412651	1.42118	0.771542	0.999213
c__Oligosphaeria;o__Oligosphaerales	0.401662	1.01595	0.692581	0.999213
c__Clostridia;o__Thermoanaerobacterales	0.40021	1.1611	0.730333	0.999213
c__Spirochaetia;o__Leptospirales	-0.400159	0.499646	0.423199	0.999213
c__Coriobacteriia;o__Anaerosomatales	-0.395203	1.00023	0.69276	0.999213
c__Limnochordia;o__Limnochordales	-0.383884	0.872397	0.659913	0.999213
c__Gammaproteobacteria;o__Aeromonadales	0.380824	1.59686	0.811506	0.999213
c__Halobacteria;o__Haloferacales	-0.377444	0.489081	0.440268	0.999213
c__Desulfobulbia;o__Desulfobulbales	-0.374411	0.592969	0.527767	0.999213
c__Actinomycetes;o__Actinopolysporales	0.354457	0.227988	0.120013	0.999213
c__Candidatus Cloacimonadia;o__Candidatus Cloacimonadales	-0.353939	0.33151	0.285675	0.999213
c__Lentisphaeria;o__Victivallales	-0.347523	0.761291	0.648036	0.999213
c__Agaricomycetes;o__Agaricales	-0.34332	0.229131	0.13404	0.999213
c__Thermoleophilia;o__Thermoleophilales	0.335901	0.177696	0.0587159	0.999213
c__Actinomycetes;o__Frankiales	-0.330759	1.65103	0.841218	0.999213
c__Anaerolineae;o__Anaerolineales	0.329926	0.55627	0.553112	0.999213
c__Clostridia;o__Halanaerobiales	-0.327765	0.369693	0.375301	0.999213
c__Betaproteobacteria;o__Rhodocyclales	-0.326838	1.94473	0.866533	0.999213
c__Gammaproteobacteria;o__Alteromonadales	-0.321756	0.73466	0.661411	0.999213
c__Sordariomycetes;o__Hypocreales	0.305627	1.09648	0.780448	0.999213
c__Clostridia;o__Christensenellales	-0.302291	1.07641	0.778839	0.999213
c__Unclassified;o__Candidatus Gastranaerophilales	0.301568	1.39631	0.829008	0.999213
c__Candidatus Moduliflexia;o__Candidatus Moduliflexales	-0.29915	1.24788	0.810543	0.999213
c__Desulfobacteria;o__Desulfobacterales	0.297541	0.534043	0.577427	0.999213
c__Chloroflexia;o__Chloroflexales	-0.284791	0.256284	0.266468	0.999213
c__Negativicutes;o__Selenomonadales	0.283326	2.80821	0.919636	0.999213
c__Mollicutes;o__Haloplasmatales	0.28141	0.323279	0.384034	0.999213
c__Desulfomonilia;o__Desulfomonilales	0.279599	0.263774	0.289147	0.999213
c__Phycisphaerae;o__Sedimentisphaerales	0.279514	0.289246	0.333866	0.999213
c__Alphaproteobacteria;o__Hyphomonadales	-0.278792	0.483975	0.564584	0.999213
c__Erysipelotrichia;o__Erysipelotrichales	-0.277419	1.12175	0.804669	0.999213
c__Candidatus Saccharimonadia;o__Candidatus Saccharimonadales	-0.27598	1.30257	0.832206	0.999213
c__Nitrososphaeria;o__Nitrosopumilales	-0.27404	0.197617	0.165526	0.999213
c__Unclassified;o__Caldicellulosiruptorales	0.268769	NA	NA	NA
c__Chthonomonadetes;o__Chthonomonadales	0.260471	0.181634	0.151559	0.999213
c__Pokkesviricetes;o__Chitovirales	-0.259676	0.185441	0.161419	0.999213
c__Betaproteobacteria;o__Burkholderiales	0.259087	1.18243	0.826562	0.999213
c__Pucciniomycetes;o__Pucciniales	-0.259022	0.241983	0.284434	0.999213
c__Myxococcia;o__Myxococcales	0.258278	0.59132	0.662269	0.999213
c__Bacilli;o__Lactobacillales	-0.258102	1.14604	0.821815	0.999213
c__Alphaproteobacteria;o__Sphingomonadales	-0.255467	0.856361	0.765462	0.999213
c__Nitrososphaeria;o__Nitrososphaerales	0.253777	0.240585	0.291502	0.999213
c__Chloroflexia;o__Kallotenuales	-0.239713	0.181162	0.185768	0.999213
c__Cyanophyceae;o__Nostocales	-0.238708	0.976492	0.806879	0.999213
c__Thermoprotei;o__Sulfolobales	0.236909	0.202006	0.240882	0.999213
c__Rhodothermia;o__Rhodothermales	0.234467	0.636902	0.712772	0.999213
c__Elusimicrobia;o__Elusimicrobiales	0.23433	0.231692	0.31183	0.999213
c__Spirochaetia;o__Spirochaetales	0.230109	0.848931	0.786347	0.999213
c__Cyanophyceae;o__Synechococcales	0.228489	1.02172	0.823045	0.999213
c__Candidatus Humimicrobiia;o__Candidatus Humimicrobiales	0.226335	0.19371	0.242636	0.999213
c__Dothideomycetes;o__Pleosporales	-0.220429	0.208056	0.289385	0.999213
c__Hydrogenophilia;o__Hydrogenophilales	-0.220133	0.300892	0.464412	0.999213
c__Howeltoviricetes;o__Cryppavirales	0.219819	0.241666	0.363035	0.999213
c__Actinomycetes;o__Nakamurellales	-0.217648	0.169434	0.198948	0.999213
c__Caldisericia;o__Caldisericales	0.215085	0.195743	0.27185	0.999213
c__Tissierellia;o__Tissierellales	0.214653	0.853357	0.801397	0.999213
c__Agaricomycetes;o__Russulales	-0.213473	0.975424	0.826766	0.999213
c__Candidatus Micrarchaeia;o__Candidatus Micrarchaeales	0.212741	0.193788	0.272292	0.999213
c__Thermoleophilia;o__Solirubrobacterales	0.211771	1.13875	0.852469	0.999213
c__Cyanophyceae;o__Oscillatoriales	0.21087	1.02062	0.836315	0.999213
c__Gammaproteobacteria;o__Thiohalobacterales	-0.210779	0.266853	0.429604	0.999213
c__Gammaproteobacteria;o__Nevskiales	-0.20785	0.271223	0.443472	0.999213
c__Aquificae;o__Desulfurobacteriales	-0.2002	0.199547	0.315729	0.999213
c__Chytridiomycetes;o__Spizellomycetales	-0.199791	0.190081	0.293219	0.999213
c__Deltaproteobacteria;o__Candidatus Acidulodesulfobacterales	0.19878	0.18035	0.270379	0.999213
c__Alphaproteobacteria;o__Emcibacterales	0.19874	0.182153	0.275248	0.999213
c__Epsilonproteobacteria;o__Nautiliales	-0.1955	0.484441	0.686538	0.999213
c__Alphaproteobacteria;o__Holosporales	0.190666	0.201583	0.344228	0.999213
c__Candidatus Fermentithermobacillia;o__Candidatus Fermentithermobacillales	0.1869	0.826965	0.821196	0.999213
c__Harpellomycetes;o__Harpellales	-0.184083	0.176507	0.296985	0.999213
c__Agaricomycetes;o__Sebacinales	-0.176705	0.170171	0.299086	0.999213
c__Thermoplasmata;o__Thermoplasmatales	-0.175005	0.877332	0.841892	0.999213
c__Glomeromycetes;o__Entrophosporales	-0.172048	0.166187	0.300543	0.999213
c__Mucoromycetes;o__Mucorales	-0.171329	0.500207	0.731963	0.999213
c__Negativicutes;o__Veillonellales	-0.17059	1.94566	0.930133	0.999213
c__Clostridia;o__Peptostreptococcales	-0.169984	1.25551	0.892303	0.999213
c__Caudoviricetes;o__Crassvirales	0.169553	2.23085	0.939416	0.999213
c__Glomeromycetes;o__Archaeosporales	-0.16582	0.160878	0.302671	0.999213
c__Thermomicrobia;o__Sphaerobacterales	0.161325	0.159922	0.313083	0.999213
c__Candidatus Thermofonsia;o__Phototrophicales	-0.160825	1.4052	0.908881	0.999213
c__Flavobacteriia;o__Flavobacteriales	-0.160269	0.799428	0.841106	0.999213
c__Mollicutes;o__Anaeroplasmatales	0.157741	0.821853	0.847794	0.999213
c__Desulfovibrionia;o__Desulfovibrionales	0.156959	2.20448	0.943239	0.999213
c__Spirochaetia;o__Brachyspirales	0.156407	1.67121	0.925436	0.999213
c__Thermomicrobia;o__Thermomicrobiales	0.156316	0.196793	0.427012	0.999213
c__Alphaproteobacteria;o__Caulobacterales	-0.152382	0.807719	0.850361	0.999213
c__Thermoflexia;o__Thermoflexales	0.152126	0.163425	0.351926	0.999213
c__Planctomycetia;o__Isosphaerales	0.151455	1.18546	0.898339	0.999213
c__Dethiobacteria;o__Dethiobacterales	0.149541	0.707605	0.832627	0.999213
c__Alphaproteobacteria;o__Geminicoccales	-0.149213	0.146849	0.30958	0.999213
c__Clostridia;o__Moorellales	0.147601	1.46756	0.919887	0.999213
c__Gammaproteobacteria;o__Enterobacterales	-0.145915	1.72307	0.932513	0.999213
Others	-0.145151	0.581257	0.802804	0.999213
c__Nitriliruptoria;o__Euzebyales	-0.145002	0.150716	0.336005	0.999213
c__Unclassified;o__Mycoplasmoidales	-0.143898	1.22112	0.906194	0.999213
c__Cyanophyceae;o__Thermostichales	-0.142138	0.140938	0.313207	0.999213
c__Clostridia;o__Eubacteriales	-0.139928	0.863265	0.871233	0.999213
c__Tokiviricetes;o__Primavirales	0.137215	0.416297	0.741696	0.999213
c__Sordariomycetes;o__Glomerellales	-0.136703	0.136429	0.31634	0.999213
c__Chlamydiia;o__Parachlamydiales	0.136377	0.142453	0.338394	0.999213
c__Chytridiomycetes;o__Synchytriales	-0.136134	0.135959	0.316687	0.999213
c__Desulfarculia;o__Desulfarculales	-0.1357	0.141492	0.337526	0.999213
c__Glomeromycetes;o__Paraglomerales	-0.133702	0.133952	0.318216	0.999213
c__Synergistia;o__Synergistales	0.13217	1.50098	0.929832	0.999213
c__Epsilonproteobacteria;o__Campylobacterales	-0.131893	0.737663	0.858096	0.999213
c__Spirochaetia;o__Brevinematales	0.131833	0.14251	0.354925	0.999213
c__Glomeromycetes;o__Diversisporales	-0.131437	0.13209	0.319708	0.999213
c__Gammaproteobacteria;o__Chromatiales	-0.130258	0.533949	0.807268	0.999213
c__Planctomycetia;o__Gemmatales	0.129975	0.13684	0.342197	0.999213
c__Cyanophyceae;o__Coleofasciculales	0.128217	0.833089	0.877684	0.999213
c__Acidimicrobiia;o__Acidimicrobiales	-0.126712	0.134539	0.346282	0.999213
c__Fusobacteriia;o__Fusobacteriales	-0.125087	1.76676	0.943557	0.999213
c__Mortierellomycetes;o__Mortierellales	-0.12248	0.124784	0.326327	0.999213
c__Lentisphaeria;o__Lentisphaerales	0.122313	0.130184	0.347452	0.999213
c__Unclassified;o__Candidatus Caldarchaeales	0.122198	0.130084	0.347538	0.999213
c__Sphingobacteriia;o__Sphingobacteriales	0.121451	0.788682	0.877616	0.999213
c__Clostridia;o__Natranaerobiales	0.121408	0.229564	0.5969	0.999213
c__Chytridiomycetes;o__Chytridiales	-0.119863	0.122669	0.328506	0.999213
c__Betaproteobacteria;o__Nitrosomonadales	-0.119075	0.925991	0.897681	0.999213
c__Chytridiomycetes;o__Rhizophydiales	-0.118366	0.121463	0.329808	0.999213
c__Thermotogae;o__Petrotogales	0.117203	0.497343	0.813698	0.999213
c__Ktedonobacteria;o__Ktedonobacterales	-0.1158	0.525892	0.825718	0.999213
c__Alphaproteobacteria;o__Candidatus Pelagibacterales	0.115549	0.130119	0.374531	0.999213
c__Candidatus Aquicultoria;o__Candidatus Aquicultorales	0.114142	0.885138	0.897394	0.999213
c__Zoopagomycetes;o__Zoopagales	-0.113674	0.117707	0.334175	0.999213
c__Armatimonadia;o__Capsulimonadales	0.113589	0.247526	0.646308	0.999213
c__Ignavibacteria;o__Ignavibacteriales	-0.113389	1.24084	0.92719	0.999213
c__Opitutae;o__Opitutales	-0.110929	0.573263	0.846563	0.999213
c__Bacteroidia;o__Marinilabiliales	0.110729	1.6739	0.947258	0.999213
c__Gammaproteobacteria;o__Moraxellales	0.110641	1.21692	0.927557	0.999213
c__Thermococci;o__Thermococcales	0.106068	0.11748	0.3666	0.999213
c__Cyanophyceae;o__Gomontiellales	-0.105055	0.110902	0.343496	0.999213
c__Chitinophagia;o__Chitinophagales	-0.104552	0.836209	0.900499	0.999213
c__Chloroflexia;o__Herpetosiphonales	-0.10441	0.111108	0.347364	0.999213
c__Betaproteobacteria;o__Neisseriales	-0.102496	1.30028	0.937171	0.999213
c__Sordariomycetes;o__Diaporthales	-0.0996003	0.761012	0.895871	0.999213
c__Schizosaccharomycetes;o__Schizosaccharomycetales	-0.0985295	0.105844	0.351909	0.999213
c__Faserviricetes;o__Tubulavirales	0.0954056	1.08446	0.929896	0.999213
c__Syntrophobacteria;o__Syntrophobacterales	0.0926004	0.911429	0.919075	0.999213
c__Gammaproteobacteria;o__Xanthomonadales	-0.0923715	0.886677	0.917029	0.999213
c__Aquificae;o__Aquificales	0.0852992	0.100267	0.394925	0.999213
c__Acidithiobacillia;o__Acidithiobacillales	0.081576	0.397976	0.83759	0.999213
c__Fimbriimonadia;o__Fimbriimonadales	0.0781584	1.37988	0.954831	0.999213
c__Mollicutes;o__Acholeplasmatales	0.0779558	0.99244	0.937391	0.999213
c__Bacteroidia;o__Bacteroidales	-0.0759589	1.37128	0.955825	0.999213
c__Actinomycetes;o__Micrococcales	-0.0754579	1.0251	0.94132	0.999213
c__Bacilli;o__Bacillales	-0.0727994	0.724079	0.919915	0.999213
c__Unclassified;o__Polyangiales	0.0722546	0.201037	0.719289	0.999213
c__Cyanophyceae;o__Spirulinales	-0.068985	0.158325	0.663041	0.999213
c__Candelariomycetes;o__Candelariales	0.0618608	0.656556	0.924934	0.999213
c__Revtraviricetes;o__Ortervirales	-0.060815	0.354768	0.863892	0.999213
c__Mollicutes;o__Entomoplasmatales	0.0588084	0.368469	0.873195	0.999213
c__Nitrospiria;o__Nitrospirales	-0.0556434	0.913536	0.951431	0.999213
c__Gammaproteobacteria;o__Thiotrichales	-0.0545931	0.560862	0.922458	0.999213
c__Thermoprotei;o__Thermofilales	0.0526216	0.27447	0.847961	0.999213
c__Dothideomycetes;o__Mycosphaerellales	-0.051764	0.316252	0.869984	0.999213
c__Alphaproteobacteria;o__Parvularculales	-0.0511526	0.215166	0.812086	0.999213
c__Desulfurellia;o__Desulfurellales	-0.0500579	0.187934	0.789963	0.999213
c__Dehalococcoidia;o__Dehalococcoidales	-0.0492148	0.715323	0.945148	0.999213
c__Phycisphaerae;o__Phycisphaerales	-0.0482536	0.851791	0.954824	0.999213
c__Gammaproteobacteria;o__Oceanospirillales	-0.0466674	1.44572	0.974249	0.999213
c__Halobacteria;o__Natrialbales	0.0417232	0.225887	0.853458	0.999213
c__Alphaproteobacteria;o__Rickettsiales	-0.0389828	0.791018	0.960695	0.999213
c__Actinomycetes;o__Pseudonocardiales	-0.0310817	0.810013	0.969391	0.999213
c__Alphaproteobacteria;o__Rhodospirillales	0.0270208	1.2076	0.982148	0.999213
c__Cytophagia;o__Cytophagales	0.0260318	0.843552	0.975381	0.999213
c__Alphaproteobacteria;o__Maricaulales	-0.0236331	1.6702	0.98871	0.999213
c__Clostridia;o__Lachnospirales	-0.021937	0.699504	0.974982	0.999213
c__Cyanophyceae;o__Geitlerinematales	0.0191127	0.137234	0.889236	0.999213
c__Gemmatimonadetes;o__Candidatus Palauibacterales	0.0176251	0.184398	0.923853	0.999213
c__Alphaproteobacteria;o__Rhodobacterales	0.0174819	1.40395	0.990065	0.999213
c__Gammaproteobacteria;o__Vibrionales	0.0134961	0.773141	0.986073	0.999213
c__Leotiomycetes;o__Helotiales	-0.0128776	0.200199	0.948712	0.999213
c__Thermodesulfovibrionia;o__Thermodesulfovibrionales	0.00841713	0.190128	0.964688	0.999213
c__Dictyoglomia;o__Dictyoglomales	0.00708006	0.767246	0.992637	0.999213
c__Syntrophorhabdia;o__Syntrophorhabdales	0.00203743	0.882291	0.998157	0.999213
c__Actinomycetes;o__Mycobacteriales	-0.0011129	1.12844	0.999213	0.999213
