# Supplementary material
Source: Research Square preprint supplement (doi:10.21203/rs.3.rs-9632664/v1)
Supplement: Supplementary file 3 [file 7d065a704c3c16dc6c50f66e.xlsx]

## Sheet: CONTROL-vs-PE.all
	logFC	se	pvalues	adjPvalues
k__Bacteria;p__Candidatus Falkowbacteria	2.51278	0.896713	0.0050754	0.669953
k__Bacteria;p__Candidatus Jorgensenbacteria	-2.26033	1.26471	0.0738993	0.992821
k__Bacteria;p__Deferribacterota	2.1607	1.09269	0.0479943	0.896682
k__Bacteria;p__Candidatus Woesebacteria	2.14907	1.07921	0.0464436	0.896682
k__Bacteria;p__Candidatus Omnitrophota	1.5016	1.45063	0.300603	0.992821
k__Bacteria;p__Candidatus Cryosericota	1.46757	0.723006	0.0423752	0.896682
k__Bacteria;p__Candidatus Levyibacteriota	1.38192	1.08882	0.204374	0.992821
k__Bacteria;p__Candidatus Shapirobacteria	1.3195	1.19796	0.270701	0.992821
k__Archaea;p__Candidatus Thermoplasmatota	1.30757	0.57055	0.0219183	0.896682
k__Bacteria;p__Candidatus Hinthialibacterota	-1.24436	0.925983	0.179007	0.992821
k__Bacteria;p__Balneolota	-1.15037	0.925991	0.214121	0.992821
k__Bacteria;p__candidate division WWE3	1.13284	1.65383	0.493358	0.992821
k__Bacteria;p__Candidatus Gracilibacteria	1.12686	1.39192	0.418186	0.992821
k__Bacteria;p__Candidatus Doudnabacteria	1.077	0.788163	0.171793	0.992821
k__Bacteria;p__Kiritimatiellota	1.06612	0.911281	0.242035	0.992821
k__Bacteria;p__Candidatus Margulisiibacteriota	0.990055	1.09185	0.364531	0.992821
k__Bacteria;p__Candidatus Gottesmanbacteria	-0.931343	1.30881	0.476716	0.992821
k__Bacteria;p__Actinomycetota	-0.928956	1.2495	0.457203	0.992821
k__Bacteria;p__Candidatus Poribacteria	-0.891364	0.985527	0.365755	0.992821
k__Bacteria;p__Coprothermobacterota	0.882893	0.788681	0.262946	0.992821
k__Bacteria;p__Chlamydiota	-0.877812	1.28556	0.494717	0.992821
k__Bacteria;p__Candidatus Roizmanbacteria	-0.824615	1.39431	0.554243	0.992821
k__Bacteria;p__Verrucomicrobiota	-0.794867	1.74444	0.648636	0.992821
k__Eukaryota;p__Chytridiomycota	0.788608	0.955505	0.409183	0.992821
k__Bacteria;p__Candidatus Berkelbacteria	0.781363	1.35841	0.565153	0.992821
k__Bacteria;p__Candidatus Collierbacteria	0.770628	0.353083	0.0290674	0.896682
k__Bacteria;p__Deinococcota	-0.769744	1.1674	0.509661	0.992821
k__Archaea;p__Candidatus Bathyarchaeota	0.74629	0.752191	0.321122	0.992821
k__Bacteria;p__Candidatus Aerophobetes	-0.740656	0.968551	0.444447	0.992821
k__Archaea;p__Nitrososphaerota	0.69512	0.935919	0.457655	0.992821
k__Archaea;p__Candidatus Lokiarchaeota	0.689609	1.10597	0.532936	0.992821
k__Bacteria;p__Candidatus Saccharibacteria	-0.685782	1.55377	0.658948	0.992821
k__Bacteria;p__Candidatus Fervidibacterota	-0.68369	1.12894	0.544778	0.992821
k__Bacteria;p__Candidatus Wolfebacteria	0.638033	1.17637	0.587561	0.992821
k__Bacteria;p__Candidatus Kryptoniota	0.6316	1.53462	0.680656	0.992821
k__Bacteria;p__Candidatus Parcubacteria	0.62956	0.830703	0.448533	0.992821
k__Bacteria;p__Candidatus Cloacimonadota	-0.617038	0.916507	0.500788	0.992821
k__Bacteria;p__Candidatus Aminicenantes	-0.61339	0.804672	0.44589	0.992821
k__Bacteria;p__Bdellovibrionota	0.58837	0.478045	0.218403	0.992821
k__Eukaryota;p__Mucoromycota	0.5773	0.642283	0.368746	0.992821
k__Bacteria;p__Fibrobacterota	-0.55776	1.56793	0.722043	0.992821
k__Viruses;p__Uroviricota	-0.501398	0.901771	0.578201	0.992821
k__Bacteria;p__Elusimicrobiota	0.499641	0.697641	0.473877	0.992821
k__Bacteria;p__Nitrospinota	-0.476908	1.35127	0.724138	0.992821
k__Bacteria;p__Candidatus Firestonebacteria	0.468564	0.229154	0.040879	0.896682
k__Viruses;p__Cressdnaviricota	-0.461604	1.58997	0.77157	0.992821
k__Bacteria;p__Candidatus Wildermuthbacteria	0.456571	1.07552	0.671192	0.992821
k__Bacteria;p__Candidatus Latescibacterota	-0.453001	1.19956	0.705698	0.992821
k__Eukaryota;p__Basidiomycota	-0.445973	1.48589	0.764072	0.992821
k__Bacteria;p__candidate division CPR2	0.444603	0.947658	0.638956	0.992821
k__Bacteria;p__Gemmatimonadota	-0.432338	0.753117	0.565924	0.992821
k__Bacteria;p__Candidatus Staskawiczbacteria	0.428843	0.973274	0.659489	0.992821
k__Archaea;p__Candidatus Thorarchaeota	0.424661	0.220708	0.0543444	0.896682
k__Bacteria;p__Candidatus Moduliflexota	-0.417171	1.25886	0.74035	0.992821
k__Archaea;p__Candidatus Verstraetearchaeota	-0.390845	0.994585	0.69434	0.992821
k__Bacteria;p__Candidatus Nealsonbacteria	0.384786	0.298071	0.196731	0.992821
k__Bacteria;p__Lentisphaerota	-0.383281	1.42279	0.787632	0.992821
k__Viruses;p__Phixviricota	0.351836	0.597612	0.556038	0.992821
k__Bacteria;p__Planctomycetota	0.349247	0.512308	0.495421	0.992821
k__Bacteria;p__Ignavibacteriota	-0.343592	1.17154	0.769307	0.992821
k__Bacteria;p__Chlorobiota	0.339636	0.544809	0.533019	0.992821
k__Bacteria;p__Armatimonadota	-0.319098	0.673378	0.635588	0.992821
k__Bacteria;p__Candidatus Zixiibacteriota	0.314919	1.04917	0.764056	0.992821
k__Bacteria;p__Candidatus Sumerlaeota	0.310457	0.226094	0.169711	0.992821
k__Bacteria;p__Aquificota	0.286564	0.303513	0.345089	0.992821
k__Bacteria;p__Candidatus Kaiserbacteria	0.283256	0.234394	0.226872	0.992821
k__Viruses;p__Lenarviricota	0.282187	0.275754	0.306152	0.992821
k__Bacteria;p__Candidatus Vogelbacteria	-0.265682	1.36306	0.845458	0.992821
k__Archaea;p__Candidatus Heimdallarchaeota	0.258512	0.265136	0.329551	0.992821
k__Archaea;p__Euryarchaeota	0.256318	1.29196	0.842736	0.992821
k__Eukaryota;p__Ascomycota	-0.254119	1.12119	0.820696	0.992821
k__Bacteria;p__Candidatus Zambryskibacteria	0.253568	0.260509	0.330375	0.992821
k__Viruses;p__Nucleocytoviricota	-0.242031	0.182551	0.184898	0.992821
k__Bacteria;p__Candidatus Magasanikiibacteriota	0.238347	0.176903	0.177873	0.992821
k__Bacteria;p__Thermomicrobiota	-0.237761	0.878171	0.786587	0.992821
k__Bacteria;p__Candidatus Harrisonbacteria	0.227242	0.173405	0.190037	0.992821
k__Bacteria;p__Candidatus Portnoybacteria	0.226313	0.333792	0.497767	0.992821
k__Archaea;p__Candidatus Aenigmatarchaeota	0.221858	0.279193	0.426822	0.992821
k__Bacteria;p__Fusobacteriota	-0.215933	1.86389	0.907771	0.992821
k__Bacteria;p__Campylobacterota	-0.213021	0.96996	0.826169	0.992821
k__Bacteria;p__Candidatus Paceibacterota	0.212028	0.217532	0.329712	0.992821
k__Bacteria;p__Caldisericota	0.209378	0.197173	0.28828	0.992821
k__Archaea;p__Candidatus Micrarchaeota	0.207018	0.1953	0.289146	0.992821
k__Bacteria;p__Chloroflexota	-0.2023	1.45734	0.889597	0.992821
k__Eukaryota;p__Zoopagomycota	-0.201707	0.191715	0.292745	0.992821
k__Archaea;p__Candidatus Nanohaloarchaeota	0.200421	0.190086	0.291712	0.992821
k__Bacteria;p__Candidatus Blackallbacteria	-0.189761	0.172253	0.270619	0.992821
k__Bacteria;p__Candidatus Schekmanbacteria	0.189567	0.181569	0.296463	0.992821
k__Viruses;p__Taleaviricota	0.186736	0.424537	0.66004	0.992821
k__Bacteria;p__Candidatus Curtissbacteria	0.181986	0.17215	0.290449	0.992821
k__Bacteria;p__Acidobacteriota	-0.179429	1.54568	0.907586	0.992821
Others	-0.170937	0.815784	0.834029	0.992821
k__Bacteria;p__Candidatus Gribaldobacteria	0.167223	0.177023	0.344843	0.992821
k__Bacteria;p__candidate division CPR3	0.156695	0.176796	0.375452	0.992821
k__Archaea;p__Thermoproteota	-0.155801	0.550184	0.777039	0.992821
k__Bacteria;p__Abditibacteriota	-0.15521	0.191082	0.416639	0.992821
k__Bacteria;p__Candidatus Raymondbacteria	-0.153468	0.16357	0.348123	0.992821
k__Bacteria;p__Candidatus Melainabacteria	0.151292	1.37253	0.912228	0.992821
k__Bacteria;p__Mycoplasmatota	-0.143047	0.712654	0.840914	0.992821
k__Bacteria;p__Candidatus Bipolaricaulota	0.140459	0.218164	0.519689	0.992821
k__Bacteria;p__Bacillota	-0.140057	0.80333	0.861594	0.992821
k__Bacteria;p__Candidatus Daviesbacteria	0.139428	1.40799	0.921118	0.992821
k__Archaea;p__Candidatus Woesearchaeota	-0.137859	0.200249	0.491176	0.992821
k__Bacteria;p__Candidatus Tectomicrobia	0.137344	0.152607	0.368128	0.992821
k__Bacteria;p__Candidatus Kuenenbacteria	-0.135371	0.144054	0.34736	0.992821
k__Bacteria;p__Candidatus Yanofskybacteria	-0.134975	0.161903	0.404461	0.992821
k__Bacteria;p__Candidatus Uhrbacteria	-0.134323	1.31762	0.918802	0.992821
k__Bacteria;p__Bacteroidota	-0.13386	1.32201	0.919348	0.992821
k__Bacteria;p__Candidatus Ratteibacteria	0.130701	0.150026	0.38365	0.992821
k__Bacteria;p__Rhodothermota	0.12959	0.696185	0.852333	0.992821
k__Bacteria;p__Candidatus Beckwithbacteria	-0.124411	0.216876	0.566206	0.992821
k__Bacteria;p__Candidatus Moraniibacteriota	-0.12277	0.951155	0.897299	0.992821
k__Bacteria;p__Candidatus Nomurabacteria	-0.107116	0.602862	0.858976	0.992821
k__Eukaryota;p__Microsporidia	-0.103642	1.4394	0.942599	0.992821
k__Bacteria;p__Candidatus Blackburnbacteria	-0.100399	1.33138	0.939889	0.992821
k__Bacteria;p__Dictyoglomota	-0.0952345	0.86734	0.912567	0.992821
k__Bacteria;p__Myxococcota	-0.0884854	0.992289	0.928944	0.992821
k__Bacteria;p__Thermotogota	0.0875938	0.506697	0.862752	0.992821
k__Archaea;p__Candidatus Nezhaarchaeota	0.0865316	0.204908	0.672809	0.992821
k__Bacteria;p__Thermodesulfobacteriota	0.0707298	1.98494	0.971575	0.992821
k__Bacteria;p__Synergistota	0.0604781	1.43286	0.966333	0.992821
k__Bacteria;p__Atribacterota	-0.0581912	0.554638	0.916441	0.992821
k__Bacteria;p__Spirochaetota	0.0536422	0.998084	0.957138	0.992821
k__Bacteria;p__Cyanobacteriota	-0.0524912	1.11468	0.962441	0.992821
k__Bacteria;p__Candidatus Hydrogenedentota	-0.0425983	1.205	0.9718	0.992821
k__Bacteria;p__Candidatus Giovannonibacteria	0.0389427	0.206192	0.850198	0.992821
k__Bacteria;p__Nitrospirota	0.0281656	0.652387	0.965564	0.992821
k__Bacteria;p__Calditrichota	0.0233266	1.11091	0.983247	0.992821
k__Viruses;p__Hofneiviricota	0.0198311	1.08334	0.985395	0.992821
k__Bacteria;p__Pseudomonadota	0.0194646	1.38244	0.988766	0.992821
k__Bacteria;p__Candidatus Handelsmanbacteria	0.0125204	1.36745	0.992695	0.992821
k__Viruses;p__Artverviricota	0.0032271	0.358645	0.992821	0.992821
