# Supplementary material
Source: Research Square preprint supplement (doi:10.21203/rs.3.rs-9632664/v1)
Supplement: Supplementary file 4 [file b70cbff97888658268f45a55.xlsx]

## Sheet: CONTROL-vs-PE.all
	logFC	se	pvalues	adjPvalues
g__Akkermansia;s__Akkermansia sp. 54_46	-4.7402	1.57243	0.00257347	0.902969
g__Prevotella;s__Prevotella dentasini	3.94187	2.05598	0.0552039	0.902969
g__Urinicoccus;s__Urinicoccus massiliensis	3.8313	2.08441	0.0660514	0.902969
g__Plesiomonas;s__Plesiomonas shigelloides	-3.76588	2.3026	0.101947	0.902969
g__Unclassified;s__Siphoviridae sp. ctNxi14	3.75743	1.63324	0.0214146	0.902969
g__Unclassified;s__Phage sp. ctGns7	-3.57708	1.46479	0.0146042	0.902969
g__Unclassified;s__Siphoviridae sp. ctEfY6	3.55265	1.65742	0.0320742	0.902969
g__Lysinibacillus;s__Lysinibacillus sp. SDF0037	-3.37037	1.14664	0.00328896	0.902969
g__Enterobacter;s__Enterobacter sp. MGH 16	3.34658	1.33474	0.0121662	0.902969
g__Olsenella;s__Olsenella sp. AM04-33	3.33871	1.5345	0.0295732	0.902969
g__Lapidilactobacillus;s__Lapidilactobacillus bayanensis	3.20781	1.17948	0.00653433	0.902969
g__Geobacillus;s__Geobacillus thermocatenulatus	3.16994	1.05531	0.00266625	0.902969
g__Vagococcus;s__Vagococcus carniphilus	3.15417	1.90951	0.0985712	0.902969
g__Phascolarctobacterium;s__Phascolarctobacterium sp. ET69	3.01154	1.52598	0.0484379	0.902969
g__Unclassified;s__Muribaculaceae bacterium Isolate-104 (HZI)	3.00563	1.33841	0.0247253	0.902969
g__Porphyromonas;s__Porphyromonas sp.	3.00182	1.23356	0.0149556	0.902969
g__Coprococcus;s__Coprococcus sp. TF11-13	2.96293	1.19291	0.012999	0.902969
g__Hallella;s__Hallella bergensis	2.9627	1.33013	0.0259223	0.902969
g__Coprobacillus;s__Coprobacillus sp. CAG:183	2.94518	0.925482	0.001461	0.902969
g__Staphylococcus;s__Staphylococcus saprophyticus	2.94259	1.59745	0.0654673	0.902969
g__Unclassified;s__Parabacteroides phage PD491P1	-2.91581	1.282	0.0229409	0.902969
g__Buorbuivirus;s__Buorbuivirus hominis	2.89793	1.91752	0.130715	0.902969
g__Prevotella;s__Prevotella sp. CAG:1124	2.81896	0.913387	0.0020268	0.902969
g__Tessaracoccus;s__Tessaracoccus caeni	-2.81873	0.999305	0.00479197	0.902969
g__Olsenella;s__Olsenella sp. AM39-30AC	2.79113	1.8604	0.133541	0.902969
g__Unclassified;s__Firmicutes bacterium CAG:460	2.769	1.50521	0.0658254	0.902969
g__Unclassified;s__Myoviridae sp. ctHP32	2.75858	1.12757	0.014426	0.902969
g__Clostridium;s__Clostridium sp. CAG:417	2.75163	1.29651	0.0338097	0.902969
g__Paenibacillus;s__Paenibacillus larvae	-2.73871	1.18382	0.0206983	0.902969
g__Unclassified;s__Bifidobacteriaceae bacterium MCC01946	-2.65928	1.77109	0.133227	0.902969
g__Paenibacillus;s__Paenibacillus silvestris	-2.63954	0.967002	0.00634084	0.902969
g__Desulfitobacterium;s__Desulfitobacterium dehalogenans	2.62837	1.51106	0.0819596	0.902969
g__Collinsella;s__Collinsella phocaeensis	-2.62355	0.721989	0.000279293	0.902969
g__Prevotella;s__Prevotella sp. CAG:1185	2.61637	1.40392	0.0623742	0.902969
g__Clostridium;s__Clostridium sp. AM54-37XD	2.6155	1.44967	0.0711983	0.902969
g__Unclassified;s__Siphoviridae sp. ctL5G6	2.60539	1.1608	0.0248021	0.902969
g__Catenibacterium;s__Catenibacterium sp. CAG:290	-2.6014	2.66334	0.328696	0.902969
g__Tractidigestivibacter;s__Tractidigestivibacter sp.	-2.59425	0.923831	0.00498281	0.902969
g__Carnobacterium;s__Carnobacterium divergens	2.58814	1.48353	0.0810579	0.902969
g__Unclassified;s__Geobacillus virus E3	2.58654	1.4381	0.0720858	0.902969
g__Leptotrichia;s__Leptotrichia sp. oral taxon 221	-2.54248	1.65484	0.124444	0.902969
g__Bacillus;s__Bacillus yapensis	-2.52897	2.05006	0.217349	0.902969
g__Unclassified;s__Erysipelotrichaceae bacterium I46	2.52381	1.34573	0.0607353	0.902969
g__Bacillus;s__Bacillus sp. OK048	-2.52087	0.84164	0.00274271	0.902969
g__Unclassified;s__Myoviridae sp. ct5lt7	-2.51748	1.45194	0.0829402	0.902969
g__Unclassified;s__Siphoviridae sp. ct4Rk11	-2.51499	1.1571	0.0297406	0.902969
g__Prevotella;s__Prevotella sp. KH2C16	2.50806	1.88914	0.184304	0.902969
g__Unclassified;s__Podoviridae sp. ctDgT26	-2.49953	1.91696	0.192265	0.902969
g__Thomasclavelia;s__Erysipelatoclostridium sp. MSK.7.34	2.49426	1.60254	0.119604	0.902969
g__Parabacteroides;s__Parabacteroides sp. AD58	2.491	1.37932	0.0709245	0.902969
g__Enterococcus;s__Enterococcus devriesei	-2.49019	1.17392	0.0338997	0.902969
g__Limosilactobacillus;s__Limosilactobacillus portuensis	-2.48837	1.31471	0.058397	0.902969
g__Roseburia;s__Roseburia sp. AF25-13LB	-2.46984	1.36519	0.0704267	0.902969
g__Citrobacter;s__Citrobacter sp. Cpo086	-2.44557	1.9608	0.212314	0.902969
g__Streptococcus;s__Streptococcus sp. SP1	-2.44108	1.53159	0.110977	0.902969
g__Exiguobacterium;s__Exiguobacterium mexicanum	-2.43409	1.54956	0.116223	0.902969
g__Sutterella;s__Sutterella sp. 63_29	-2.43407	1.48372	0.100898	0.902969
g__Leuconostoc;s__uncultured Leuconostoc sp.	-2.42368	0.903079	0.00727909	0.902969
g__Thermicanus;s__Thermicanus aegyptius	2.41772	1.38773	0.0814708	0.902969
g__Pantoea;s__Pantoea sp. CCBC3-3-1	2.4167	1.57259	0.12435	0.902969
g__Rhizobium;s__Rhizobium yanglingense	-2.40297	1.31452	0.0675471	0.902969
g__Fontibacillus;s__Fontibacillus phaseoli	2.39281	1.33268	0.0725772	0.902969
g__Prevotella;s__Prevotella dentalis	2.39221	0.837433	0.00428215	0.902969
g__Unclassified;s__Parabacteroides phage PDS1	-2.38782	1.15404	0.0385366	0.902969
g__Unclassified;s__uncultured bacterium Contig1625	-2.38299	1.37267	0.0825599	0.902969
g__Unclassified;s__Clostridiales bacterium FE2010	2.38012	1.07155	0.0263383	0.902969
g__Unclassified;s__Planctomycetaceae bacterium	-2.37243	1.09497	0.03026	0.902969
g__Kluyvera;s__Kluyvera sp. EC_51	-2.37024	1.04946	0.0239126	0.902969
g__Unclassified;s__Myoviridae sp. ctKaW6	2.36416	1.32146	0.0736059	0.902969
g__Unclassified;s__Siphoviridae sp. ctjBn3	-2.3598	1.39007	0.0895813	0.902969
g__Moraxella;s__Moraxella catarrhalis	2.34618	1.19092	0.0488313	0.902969
g__Pseudomonas;s__Pseudomonas orientalis	2.34337	0.918352	0.0107195	0.902969
g__Clostridium;s__Clostridium sp. LQ25	2.33942	1.28534	0.0687457	0.902969
g__Collinsella;s__Collinsella sp. AF08-23	-2.33913	1.12911	0.038297	0.902969
g__Prevotella;s__Prevotella sp. AG:487_50_53	2.3246	1.67591	0.165422	0.902969
g__Paenibacillus;s__Paenibacillus sp. L3-i20	2.31301	1.50773	0.125005	0.902969
g__Unclassified;s__Lachnospiraceae bacterium AM25-22	-2.29741	1.61172	0.15403	0.902969
g__Unclassified;s__Myoviridae sp. ctBZY1	2.27409	1.48481	0.125629	0.902969
g__Paenibacillus;s__Paenibacillus sp. URB8-2	2.2677	1.3597	0.0953574	0.902969
g__Ruminococcus;s__Ruminococcus sp. CAG:254	2.24459	1.4485	0.121239	0.902969
g__Unclassified;s__Bifidobacteriaceae bacterium MCC01994	-2.23335	1.28277	0.0816771	0.902969
g__Unclassified;s__Siphoviridae sp. ctbbV81	-2.23323	1.57485	0.156173	0.902969
g__Tissierella;s__Tissierella creatinophila	2.20687	0.696617	0.00153498	0.902969
g__Unclassified;s__Siphoviridae sp. ctkJH11	-2.19627	1.08711	0.0433538	0.902969
g__Mesosutterella;s__Mesosutterella sp. oilRF-744-WT-GAM-9	2.18925	0.918125	0.0171031	0.902969
g__Enterocloster;s__Enterocloster sp. OA11	2.18771	1.22599	0.0743512	0.902969
g__Barnesiella;s__Barnesiella sp. An55	2.18027	1.19803	0.0687776	0.902969
g__Coprobacillus;s__Coprobacillus sp. AF33-1AC	2.17971	1.6467	0.18561	0.902969
g__Bacteroides;s__Bacteroides sp. AM23-18	2.17567	0.88654	0.0141231	0.902969
g__Capnocytophaga;s__Capnocytophaga felis	2.17464	1.37827	0.114612	0.902969
g__Prevotella;s__Prevotella sp. CAG:873	2.1665	1.09148	0.0471527	0.902969
g__Saccharopolyspora;s__Saccharopolyspora soli	2.16396	1.30233	0.0965923	0.902969
g__Halanaeroarchaeum;s__Halanaeroarchaeum sp. HSR-CO	2.1568	1.48525	0.146461	0.902969
g__Unclassified;s__Firmicutes bacterium CAG:321	2.15403	1.73944	0.215586	0.902969
g__Coprobacillus;s__Coprobacillus sp. D7	2.14344	0.835706	0.0103227	0.902969
g__Unclassified;s__Siphoviridae sp. ctDmQ3	2.13839	1.27142	0.0925908	0.902969
g__Akkermansia;s__Akkermansia sp.	-2.12708	1.25507	0.0901154	0.902969
g__Slackia;s__Slackia faecicanis	-2.12565	0.986183	0.0311278	0.902969
g__Atopobium;s__Atopobium sp.	-2.12333	0.946244	0.0248352	0.902969
g__Alicyclobacillus;s__Alicyclobacillus sp. ALC3	-2.12253	0.996652	0.0331995	0.902969
g__Enhydrobacter;s__Enhydrobacter sp. 8BJ	-2.12087	1.2	0.0771617	0.902969
g__Palleniella;s__Palleniella intestinalis	2.11686	0.871577	0.0151501	0.902969
g__Bacteroides;s__Bacteroides sp. ZJ-18	2.114	0.922731	0.021962	0.902969
g__Unclassified;s__Bacilli bacterium	2.11387	1.8579	0.255215	0.902969
g__Parabacteroides;s__Parabacteroides sp. AM08-6	2.11163	1.44486	0.143884	0.902969
g__Coprobacillus;s__Coprobacillus sp. AF15-30	-2.10771	1.73858	0.225389	0.902969
g__Unclassified;s__Clostridiaceae bacterium M8S5	2.10442	0.925767	0.0230163	0.902969
g__Ruminococcus;s__Ruminococcus sp. AM28-13	2.0994	0.86405	0.0151103	0.902969
g__Unclassified;s__Siphoviridae sp. ct1TR2	-2.09776	0.73804	0.00447827	0.902969
g__Helcococcus;s__Helcococcus ovis	2.08491	1.28662	0.105134	0.902969
g__Bacteroides;s__Bacteroides sp. AM32-11AC	2.08407	1.12335	0.0635632	0.902969
g__Kingevirus;s__Kingevirus communis	-2.07863	1.18685	0.0798793	0.902969
g__Mycoplasma;s__Mycoplasma sp. CAG:472	2.07843	1.52337	0.172455	0.902969
g__Ruminococcus;s__Ruminococcus sp. AF21-11	2.07785	0.710345	0.00344317	0.902969
g__Halolactibacillus;s__Halolactibacillus miurensis	-2.06758	1.12731	0.0666422	0.902969
g__Clostridium;s__Clostridium sp. CAG:302	2.06515	1.62838	0.204717	0.902969
g__Afonbuvirus;s__Afonbuvirus faecalis	2.06506	1.40964	0.142935	0.902969
g__Sutterella;s__Sutterella massiliensis	2.06444	1.13064	0.0678641	0.902969
g__Clostridium;s__Clostridium moniliforme	2.06084	0.982044	0.0358588	0.902969
g__Desulfosporosinus;s__Desulfosporosinus sp. FKA	-2.06049	0.974791	0.034534	0.902969
g__Pseudobutyrivibrio;s__Pseudobutyrivibrio sp. UC1225	2.05863	0.914484	0.0243767	0.902969
g__Paenibacillus;s__Paenibacillus sp. RC67	2.05752	1.37501	0.134558	0.902969
g__Unclassified;s__Caudovirales sp. ctNZz8	2.05386	0.645668	0.00146772	0.902969
g__Clostridium;s__Clostridium sp. ZBS15	2.04858	1.42903	0.151702	0.902969
g__Enterococcus;s__Enterococcus quebecensis	-2.0428	1.07699	0.0578587	0.902969
g__Bacillus;s__Bacillus sp. 1NLA3E	-2.04085	0.635937	0.00133102	0.902969
g__Pseudobutyrivibrio;s__Pseudobutyrivibrio sp. JW11	-2.03823	1.32338	0.12352	0.902969
g__Clostridium;s__Clostridium haemolyticum	2.03494	1.55079	0.189453	0.902969
g__Streptomyces;s__Streptomyces sp. WAC05292	-2.03032	1.17596	0.0842543	0.902969
g__Yokenella;s__Yokenella regensburgei	-2.02296	0.919801	0.0278538	0.902969
g__Amphibacillus;s__Amphibacillus marinus	2.02035	1.40017	0.149041	0.902969
g__Ruminococcus;s__Ruminococcus sp. AM54-1NS	2.01582	0.754787	0.00756917	0.902969
g__Leuconostoc;s__Leuconostoc garlicum	-2.01237	1.17477	0.0867137	0.902969
g__Isachenkonia;s__Isachenkonia alkalipeptolytica	2.012	1.23758	0.104001	0.902969
g__Coprobacillus;s__Coprobacillus sp. AM23-2	-2.00947	0.653737	0.00211335	0.902969
g__Clostridium;s__Clostridium algifaecis	2.00834	1.26813	0.113263	0.902969
g__Enterococcus;s__Enterococcus villorum	-2.0081	1.20871	0.0966426	0.902969
g__Bombilactobacillus;s__Bombilactobacillus mellis	2.00728	1.5874	0.206047	0.902969
g__Enterobacter;s__Enterobacter sp. HG048	-2.00643	1.25409	0.109619	0.902969
g__Fructilactobacillus;s__Fructilactobacillus lindneri	2.00256	1.65524	0.226344	0.902969
g__Unclassified;s__Siphoviridae sp. ctKFk2	-2.00064	1.38081	0.147371	0.902969
g__Ruminococcus;s__Ruminococcus sp. TF12-2	2.00049	0.998738	0.0451758	0.902969
g__Lawsonibacter;s__Lawsonibacter faecis	1.99969	0.557647	0.000335855	0.902969
g__Mucinivorans;s__Mucinivorans hirudinis	1.99729	1.61298	0.215618	0.902969
g__Coprobacillus;s__Coprobacillus sp. AM09-26	-1.99111	0.593465	0.000793484	0.902969
g__Coprobacillus;s__Coprobacillus sp. AM29-13	-1.98877	0.961883	0.0386799	0.902969
g__Bacteroides;s__Bacteroides sp. ET71	1.98806	0.963384	0.0390539	0.902969
g__Serratia;s__Serratia sp. SSNIH5	-1.98707	1.43979	0.167552	0.902969
g__Ruminococcus;s__Ruminococcus sp. OM07-17	1.98364	0.734049	0.00688555	0.902969
g__Unclassified;s__Siphoviridae sp. ct2QJ10	-1.97953	1.22181	0.105199	0.902969
g__Unclassified;s__Siphoviridae sp. ctXQ92	1.97743	1.31228	0.131844	0.902969
g__Schnuerera;s__Schnuerera sp.	1.9735	1.39724	0.157824	0.902969
g__Unclassified;s__Siphoviridae sp. ctGa111	-1.96988	1.37513	0.152	0.902969
g__Adlercreutzia;s__Adlercreutzia sp. R22	-1.96477	1.08878	0.0711425	0.902969
g__Sutterella;s__Sutterella seckii	1.96355	1.53723	0.201487	0.902969
g__Citrobacter;s__Citrobacter werkmanii	-1.9622	0.946549	0.0381716	0.902969
g__Fusobacterium;s__Fusobacterium varium	1.96126	0.947293	0.0384165	0.902969
g__Faecalibacillus;s__uncultured Faecalibacillus sp.	-1.95951	1.75554	0.264342	0.902969
g__Pseudarthrobacter;s__Pseudarthrobacter sulfonivorans	1.95406	1.52524	0.200143	0.902969
g__Collinsella;s__Collinsella sp. TM10-22	-1.94848	0.936834	0.0375388	0.902969
g__Parvimonas;s__uncultured Parvimonas sp.	1.94821	0.602443	0.00122136	0.902969
g__Coprobacter;s__Coprobacter sp.	1.94777	1.51575	0.198785	0.902969
g__Clostridium;s__Clostridium sp. CAG:628	1.94425	1.33718	0.145949	0.902969
g__Collinsella;s__uncultured Collinsella sp. SMG3	-1.94326	0.963082	0.0436169	0.902969
g__Caproicibacterium;s__Caproicibacterium sp. BJN0003	1.94215	0.823258	0.018319	0.902969
g__Allobaculum;s__Allobaculum fili	-1.94191	1.2837	0.130345	0.902969
g__Anaerococcus;s__Anaerococcus murdochii	1.94001	1.94252	0.317934	0.902969
g__Alkaliphilus;s__Alkaliphilus peptidifermentans	1.93747	1.40938	0.169225	0.902969
g__Sporotomaculum;s__Sporotomaculum syntrophicum	-1.93408	1.26865	0.127378	0.902969
g__Pectobacterium;s__Pectobacterium carotovorum	-1.93331	1.4406	0.179591	0.902969
g__Enterobacter;s__Enterobacter sp. CM29	-1.93226	1.39057	0.164666	0.902969
g__Collinsella;s__Collinsella vaginalis	-1.93163	1.23827	0.118773	0.902969
g__Domibacillus;s__Domibacillus robiginosus	-1.92708	1.27833	0.131684	0.902969
g__Acholeplasma;s__Acholeplasma sp. CAG:878	1.92234	0.82991	0.0205404	0.902969
g__Streptococcus;s__Streptococcus hyointestinalis	-1.90775	1.03409	0.0650576	0.902969
g__Chryseobacterium;s__Chryseobacterium sp. G0162	-1.90667	0.778563	0.0143268	0.902969
g__Mesosutterella;s__Mesosutterella multiformis	1.90118	1.14326	0.0963244	0.902969
g__Unclassified;s__Prokaryotic dsDNA virus sp.	-1.90076	1.12583	0.0913484	0.902969
g__Duncaniella;s__Duncaniella sp.	1.89908	0.894984	0.0338446	0.902969
g__Ruminococcus;s__Ruminococcus sp. AM43-6	1.89724	1.0201	0.0629056	0.902969
g__Megasphaera;s__Megasphaera vaginalis (ex Bordigoni et al. 2020)	-1.89635	1.0389	0.0679496	0.902969
g__Parabacteroides;s__Parabacteroides chongii	-1.89584	1.11298	0.0884952	0.902969
g__Akkermansia;s__Akkermansia sp. NBRC 115031	-1.89296	1.70024	0.265561	0.902969
g__Segatella;s__Segatella baroniae	1.89156	1.44027	0.189069	0.902969
g__Succiniclasticum;s__Succiniclasticum sp.	1.8901	0.803453	0.0186493	0.902969
g__Unclassified;s__Siphoviridae sp. cti0B23	-1.88903	1.24871	0.130334	0.902969
g__Citrobacter;s__Citrobacter sp. S44_ASV_140	-1.88826	1.15224	0.101262	0.902969
g__Paenibacillus;s__Paenibacillus marchantiophytorum	1.88622	1.37501	0.170132	0.902969
g__Unclassified;s__Eubacteriaceae bacterium ES3	1.88506	1.24388	0.129653	0.902969
g__Streptomyces;s__Streptomyces viridodiastaticus	-1.88332	1.7083	0.270265	0.902969
g__Metabacillus;s__Metabacillus indicus	-1.87973	1.27555	0.140573	0.902969
g__Thermophilibacter;s__Thermophilibacter sp. ET337	-1.87618	1.22927	0.126948	0.902969
g__Coprobacillus;s__Coprobacillus sp. AF13-4LB	-1.87602	0.764779	0.0141661	0.902969
g__Unclassified;s__Streptococcus satellite phage Javan379	-1.86774	1.40214	0.182841	0.902969
g__Paenibacillus;s__Paenibacillus sp. 32352	1.86063	1.29544	0.150918	0.902969
g__Unclassified;s__Siphoviridae sp. ctP6p7	-1.85932	1.23369	0.131778	0.902969
g__Leuconostoc;s__Leuconostoc falkenbergense	-1.85848	0.919648	0.0432937	0.902969
g__Phocaeicola;s__Phocaeicola salanitronis	1.8561	1.75802	0.291062	0.902969
g__Bacteroides;s__Bacteroides sp. CAG:702	1.85377	1.26807	0.143773	0.902969
g__Parabacteroides;s__Parabacteroides faecalis	1.85349	0.859696	0.0310853	0.902969
g__Neobacillus;s__Neobacillus dielmonensis	-1.84708	0.963791	0.0553047	0.902969
g__Unclassified;s__Burkholderiales bacterium	1.84226	0.739531	0.0127343	0.902969
g__Unclassified;s__Siphoviridae sp. ct6bb17	1.84121	1.86306	0.323019	0.902969
g__Tractidigestivibacter;s__Tractidigestivibacter scatoligenes	1.84005	1.10115	0.0947159	0.902969
g__Paenibacillus;s__Paenibacillus phytorum	-1.83736	1.07905	0.0886137	0.902969
g__Cohnella;s__Cohnella kolymensis	1.83673	1.58122	0.245401	0.902969
g__Clostridium;s__Clostridium aciditolerans	1.82603	1.38002	0.185771	0.902969
g__Cryptobacterium;s__Cryptobacterium sp. CAG:338	-1.82588	1.13341	0.107187	0.902969
g__Afonbuvirus;s__Afonbuvirus intestinihominis	1.8239	1.11564	0.102081	0.902969
g__Peptoniphilus;s__uncultured Peptoniphilus sp.	1.81777	1.49458	0.223893	0.902969
g__Paramaledivibacter;s__Paramaledivibacter caminithermalis	-1.81423	1.06465	0.0883709	0.902969
g__Coprobacillus;s__Coprobacillus sp. AF36-10BH	-1.81252	0.639419	0.00458787	0.902969
g__Butyrivibrio;s__Butyrivibrio sp. WCD2001	-1.8095	0.983227	0.065715	0.902969
g__Candidatus Epulonipiscium;s__Epulopiscium sp. SCG-C06WGA-EpuloA1	1.80861	1.31047	0.167548	0.902969
g__Sutterella;s__Sutterella sp. CAG:351	1.80225	1.14281	0.114786	0.902969
g__Unclassified;s__Myoviridae sp. ctngn1	1.80137	0.976884	0.0651835	0.902969
g__Lysinibacillus;s__Lysinibacillus capsici	1.80053	1.39359	0.196355	0.902969
g__Clostridium;s__Clostridium saccharoperbutylacetonicum	1.79746	0.972465	0.0645514	0.902969
g__Xylanibacter;s__Xylanibacter muris	1.7953	1.006	0.0743273	0.902969
g__Paenibacillus;s__Paenibacillus albidus	1.78781	1.30599	0.171019	0.902969
g__Selenomonas;s__Selenomonas sp. FOBRC6	1.78757	0.731967	0.0146004	0.902969
g__Bacteroides;s__Bacteroides helcogenes	1.78203	0.887258	0.0445934	0.902969
g__Clostridium;s__Clostridium sp. CAG:1193	1.77872	1.18584	0.133624	0.902969
g__Bacteroides;s__Bacteroides ndongoniae	1.77802	0.820726	0.0302806	0.902969
g__Granulicatella;s__Granulicatella sp. zg-ZJ	-1.77702	1.68676	0.292108	0.902969
g__Coprobacillus;s__Coprobacillus sp. AF09-1A	1.77521	1.91608	0.354197	0.902969
g__Sodaliphilus;s__Sodaliphilus pleomorphus	1.77257	1.20616	0.14167	0.902969
g__Bombilactobacillus;s__Bombilactobacillus bombi	-1.77063	1.21902	0.146363	0.902969
g__Clostridium;s__Clostridium sp. CMCC3677	1.76314	1.16953	0.131668	0.902969
g__Arachidicoccus;s__Arachidicoccus ginsenosidivorans	-1.76167	0.889964	0.0477615	0.902969
g__Unclassified;s__Dehalococcoidia bacterium DG_22	-1.75649	1.24176	0.15721	0.902969
g__Coprobacillus;s__Coprobacillus sp. AF31-1BH	-1.7551	0.660968	0.00792274	0.902969
g__Unclassified;s__Siphoviridae sp. ctZZK17	1.75365	1.00585	0.0812537	0.902969
g__Morganella;s__Morganella morganii	-1.75228	1.06455	0.0997586	0.902969
g__Aeromonas;s__Aeromonas piscicola	-1.75064	1.09085	0.108528	0.902969
g__Paenibacillus;s__Paenibacillus andongensis	1.74942	1.0626	0.0996902	0.902969
g__Paenibacillus;s__Paenibacillus lupini	-1.74494	1.45977	0.231948	0.902969
g__Segatella;s__Segatella cerevisiae	1.74393	0.99826	0.0806432	0.902969
g__Paenibacillus;s__Paenibacillus sp. Root52	1.74329	1.49361	0.243144	0.902969
g__Paenibacillus;s__Paenibacillus doosanensis	1.73551	1.31413	0.186617	0.902969
g__Clostridium;s__Clostridium sp. 28_17	1.73361	1.51127	0.251331	0.902969
g__Tepidimicrobium;s__Tepidimicrobium xylanilyticum	1.73331	1.02978	0.092339	0.902969
g__Ruminococcus;s__Ruminococcus sp. AF25-19	1.7312	0.961139	0.0716719	0.902969
g__Marseilla;s__Marseilla massiliensis	1.73085	0.734573	0.0184597	0.902969
g__Tannerella;s__Tannerella sp. AM09-19	1.729	1.18513	0.14459	0.902969
g__Unclassified;s__Myoviridae sp. ctQf419	1.7274	2.09877	0.410477	0.91941
g__Sporolactobacillus;s__Sporolactobacillus putidus	-1.72483	0.888377	0.0521916	0.902969
g__Limosilactobacillus;s__Limosilactobacillus vaginalis	-1.7234	1.32647	0.193864	0.902969
g__Allisonella;s__Allisonella histaminiformans	-1.72299	NA	NA	NA
g__Collinsella;s__Collinsella sp.	-1.71978	0.746598	0.0212518	0.902969
g__Coprobacillus;s__Coprobacillus sp.	1.71548	0.96851	0.0765187	0.902969
g__Caldalkalibacillus;s__Caldalkalibacillus thermarum	-1.71324	1.22702	0.162638	0.902969
g__Cetobacterium;s__Cetobacterium somerae	1.71231	0.962916	0.0753626	0.902969
g__Unclassified;s__Myoviridae sp. ctLtm40	1.70989	1.29232	0.185798	0.902969
g__Mesosutterella;s__Mesosutterella sp. AGMB02718	1.70339	0.804995	0.0343424	0.902969
g__Mycoplasma;s__Mycoplasma sp. CAG:611	1.70289	1.08986	0.118172	0.902969
g__Unclassified;s__Myoviridae sp. ct5ra14	-1.70133	1.41779	0.230144	0.902969
g__Paenibacillus;s__Paenibacillus durus	1.70097	1.13224	0.133019	0.902969
g__Turicimonas;s__uncultured Turicimonas sp.	1.70067	0.697386	0.0147425	0.902969
g__Shouchella;s__Shouchella clausii	1.70005	1.04394	0.103421	0.902969
g__Nocardioides;s__Nocardioides dokdonensis	1.69827	1.25102	0.17462	0.902969
g__Unclassified;s__Escherichia phage Evi	-1.69775	1.45869	0.244469	0.902969
g__Clostridium;s__Clostridium sp. C105KSO14	1.69721	0.548671	0.00197937	0.902969
g__Xylanibacter;s__Xylanibacter caecicola	1.69702	0.761469	0.02584	0.902969
g__Kocuria;s__Kocuria rhizophila	-1.69345	0.947149	0.0737854	0.902969
g__Unclassified;s__Myoviridae sp. ctcyQ27	-1.68957	2.0596	0.412022	0.920225
g__Coprobacillus;s__Coprobacillus sp. AF13-25	-1.68899	0.623505	0.00675134	0.902969
g__Pseudoflavonifractor;s__Pseudoflavonifractor sp. BSD2780061688st1 E11	-1.68894	0.916057	0.0652256	0.902969
g__Bacteroides;s__Bacteroides sp. An269	1.68322	1.24123	0.175072	0.902969
g__Staphylococcus;s__Staphylococcus haemolyticus	1.6827	1.05596	0.111043	0.902969
g__Bacillus;s__Bacillus pinisoli	-1.68194	1.33548	0.207874	0.902969
g__Enterobacter;s__Enterobacter sp. EGD-HP1	-1.68184	1.18605	0.156185	0.902969
g__Citrobacter;s__Citrobacter sp. MGH110	-1.68177	1.48982	0.258964	0.902969
g__Haloferax;s__Haloferax sulfurifontis	-1.68122	1.75232	0.337346	0.902969
g__Treponema;s__Treponema peruense	1.67856	1.64425	0.307318	0.902969
g__Limosilactobacillus;s__Limosilactobacillus antri	-1.67849	1.48159	0.257256	0.902969
g__Dehalobacter;s__Dehalobacter sp.	-1.67525	0.873267	0.0550642	0.902969
g__Atopobium;s__Atopobium fossor	-1.67269	1.13618	0.140967	0.902969
g__Poseidonibacter;s__Poseidonibacter antarcticus	-1.67113	1.16202	0.150396	0.902969
g__Unclassified;s__Siphoviridae sp. cte421	1.66952	1.37092	0.223295	0.902969
g__Coprobacillus;s__Coprobacillus sp. CAG:235_29_27	-1.66803	0.617804	0.0069353	0.902969
g__Unclassified;s__Siphoviridae sp. ctGoR6	-1.66208	1.45282	0.252611	0.902969
g__Clostridium;s__Clostridium sp. CAG:75	1.66086	0.833792	0.0463776	0.902969
g__Faecalibaculum;s__uncultured Faecalibaculum sp.	-1.65945	1.11804	0.137743	0.902969
g__Paraclostridium;s__Paraclostridium ghonii	-1.65943	0.847271	0.0501646	0.902969
g__Anaerosolibacter;s__Anaerosolibacter carboniphilus	1.65936	0.942513	0.0783111	0.902969
g__Anaerobiospirillum;s__Anaerobiospirillum thomasii	-1.658	1.2855	0.19713	0.902969
g__Prevotella;s__Prevotella sp. P5-92	1.65709	0.567904	0.00352388	0.902969
g__Citrobacter;s__Citrobacter sp. wls826	-1.6561	1.68541	0.3258	0.902969
g__Cohnella;s__Cohnella candidum	-1.64631	0.879972	0.0613637	0.902969
g__Clostridium;s__Clostridium folliculivorans	1.64521	1.50206	0.273382	0.902969
g__Clostridium;s__Clostridium sp. DMHC 10	1.64489	1.16072	0.156445	0.902969
g__Lactobacillus;s__Lactobacillus sp. JM1	-1.64181	1.80579	0.363251	0.902969
g__Enterococcus;s__Enterococcus gilvus	1.64086	1.46636	0.263139	0.902969
g__Clostridium;s__Clostridium sp. CAG:1000	1.63821	1.06052	0.122414	0.902969
g__Olsenella;s__Olsenella sp. AF21-51	1.63658	1.66681	0.326169	0.902969
g__Clostridium;s__Clostridium bornimense	1.63348	0.724157	0.0240897	0.902969
g__Paenibacillus;s__Paenibacillus silvae	-1.63343	1.3116	0.212996	0.902969
g__Selenomonas;s__Selenomonas sp. oral taxon 136	1.63226	0.941443	0.082956	0.902969
g__Oribacterium;s__Oribacterium sp. P6A1	-1.63113	1.04738	0.119388	0.902969
g__Mycoplasma;s__Mycoplasma sp. CAG:877	1.62899	1.40661	0.246827	0.902969
g__Unclassified;s__virus sp. ctDYl1	-1.62885	1.06595	0.126495	0.902969
g__Unclassified;s__Siphoviridae sp. ctekV29	-1.62843	1.20967	0.178245	0.902969
g__Unclassified;s__Alphaproteobacteria bacterium HGW-Alphaproteobacteria-12	-1.62761	1.39719	0.244052	0.902969
g__Roseateles;s__Pelomonas sp. KK5	-1.62557	1.02449	0.11258	0.902969
g__Andreesenia;s__Andreesenia angusta	1.62433	0.875831	0.0636508	0.902969
g__Prevotella;s__Prevotella sp. E2-28	1.62317	1.11166	0.144253	0.902969
g__Niallia;s__Niallia circulans	1.62231	0.982982	0.0988621	0.902969
g__Deferrivibrio;s__Deferrivibrio essentukiensis	1.62095	1.35292	0.230874	0.902969
g__Bacteroides;s__Bacteroides togonis	1.62086	0.937061	0.0836791	0.902969
g__Ruminococcus;s__Ruminococcus sp. AF19-4LB	-1.6197	0.924232	0.0796914	0.902969
g__Clostridium;s__Clostridium sp. 12(A)	1.6193	1.32306	0.220989	0.902969
g__Yersinia;s__Yersinia enterocolitica	-1.61334	1.80132	0.370443	0.902969
g__Fusobacterium;s__Fusobacterium hominis	-1.61312	2.52658	0.523174	0.998333
g__Macrococcoides;s__Macrococcoides bohemicum	1.60825	1.54464	0.297792	0.902969
g__Unclassified;s__Clostridiales bacterium GWD2_32_59	1.60697	1.17467	0.171307	0.902969
g__Clostridium;s__Clostridium coskatii	1.6031	1.07114	0.134489	0.902969
g__Coprobacillus;s__Coprobacillus sp. CAG:235	-1.6025	0.560271	0.00423338	0.902969
g__Coprobacillus;s__Coprobacillus sp. AF37-2	-1.60156	0.747786	0.0322147	0.902969
g__Citrobacter;s__Citrobacter sp. Res13-Sevr-PEB04-36	-1.59788	1.7226	0.353616	0.902969
g__Oceanobacillus;s__Oceanobacillus jeddahense	1.59771	1.12853	0.156851	0.902969
g__Leuconostoc;s__Leuconostoc pseudomesenteroides	-1.59683	0.852447	0.0610368	0.902969
g__Faecalibacillus;s__[Clostridium] ammoniilyticum	-1.59212	0.585181	0.00651392	0.902969
g__Paenibacillus;s__Paenibacillus uliginis	-1.58249	1.56137	0.310808	0.902969
g__Prevotella;s__Prevotella sp. CAG:279	1.58183	1.44238	0.272781	0.902969
g__Methanobrevibacter;s__Methanobrevibacter smithii	1.5817	1.13192	0.162303	0.902969
g__Mitsuokella;s__Mitsuokella multacida	1.58108	0.625394	0.0114668	0.902969
g__Bacteroides;s__Bacteroides sp. BFG-637	1.57963	0.805859	0.0499746	0.902969
g__Micromonospora;s__Micromonospora olivasterospora	-1.57694	0.57063	0.00571827	0.902969
g__Unclassified;s__Siphoviridae sp. ctBWu8	1.57309	1.81272	0.3855	0.904564
g__Muribaculum;s__Muribaculum sp.	1.5725	1.29001	0.222854	0.902969
g__Buttiauxella;s__Buttiauxella ferragutiae	-1.57031	1.45837	0.28159	0.902969
g__Fibrobacter;s__Fibrobacter succinogenes	-1.57009	1.01929	0.123469	0.902969
g__Paenibacillus;s__Paenibacillus alkalitolerans	1.56982	0.899425	0.0809223	0.902969
g__Intestinimonas;s__Intestinimonas sp. UBA1698	1.56911	0.606749	0.00970706	0.902969
g__Enterobacter;s__Enterobacter mori	-1.56809	1.07571	0.144915	0.902969
g__Coprobacillus;s__Coprobacillus sp. OF03-2AA	-1.56783	1.64518	0.340598	0.902969
g__Desulfotruncus;s__Desulfotruncus arcticus	-1.56667	0.82111	0.056393	0.902969
g__Vibrio;s__Vibrio vulnificus	-1.55945	1.08855	0.151974	0.902969
g__Coprobacillus;s__Coprobacillus sp. AF13-15	-1.55931	0.548896	0.00449988	0.902969
g__Cuspidothrix;s__Cuspidothrix issatschenkoi	-1.55626	1.0258	0.129238	0.902969
g__Dysgonomonas;s__Dysgonomonas sp. Marseille-P4361	-1.55303	1.41149	0.271212	0.902969
g__Prevotella;s__Prevotella sp. P3-122	1.55254	1.33732	0.245668	0.902969
g__Methanohalophilus;s__Methanohalophilus portucalensis	1.55245	1.32576	0.241603	0.902969
g__Butyricimonas;s__Butyricimonas sp. BSD2780061689_150309_C8	-1.55064	0.74298	0.036883	0.902969
g__Pseudomonas;s__Pseudomonas syringae	-1.54955	1.04691	0.138841	0.902969
g__Paenibacillus;s__Paenibacillus spongiae	-1.54778	0.957958	0.106158	0.902969
g__Eubacterium;s__Eubacterium sp. OF10-16	1.5454	1.2728	0.22468	0.902969
g__Alegriavirus;s__Alegriavirus av2B8	1.5448	1.36575	0.25801	0.902969
g__Treponema;s__Treponema zioleckii	1.54477	0.865052	0.074139	0.902969
g__Clostridium;s__Clostridium sp. CAG:914	1.54438	1.26761	0.223097	0.902969
g__Caloramator;s__Caloramator sp. ALD01	1.54432	0.979536	0.114893	0.902969
g__Unclassified;s__Siphoviridae sp. ctoyo6	1.5439	1.09237	0.157552	0.902969
g__Paenibacillus;s__Paenibacillus amylolyticus	-1.54374	0.740502	0.0370944	0.902969
g__Unclassified;s__Siphoviridae sp. ctLAw30	1.54279	1.38453	0.26515	0.902969
g__Bifidobacterium;s__Bifidobacterium margollesii	-1.53993	1.26214	0.222429	0.902969
g__Lactobacillus;s__Lactobacillus paragasseri	-1.53859	1.29378	0.234353	0.902969
g__Trichococcus;s__Trichococcus sp. K1Tr	1.53737	1.30003	0.23698	0.902969
g__Senegalimassilia;s__Senegalimassilia sp.	1.53385	0.861013	0.0748389	0.902969
g__Unclassified;s__Myoviridae sp. ctPoO4	-1.53264	1.13529	0.177014	0.902969
g__Bifidobacterium;s__Bifidobacterium felsineum	-1.53243	1.51181	0.310753	0.902969
g__Bacteroides;s__Bacteroides sp. 224	-1.53144	1.62827	0.346943	0.902969
g__Unclassified;s__Eggerthellales bacterium	-1.529	0.981592	0.11931	0.902969
g__Actinobacillus;s__Actinobacillus equuli	-1.52889	0.875262	0.0806755	0.902969
g__Unclassified;s__Bacteroidales bacterium KHT7	-1.52722	1.44054	0.289068	0.902969
g__Bacteroides;s__Bacteroides sp. An19	1.52392	1.21209	0.20866	0.902969
g__Ruminococcus;s__Ruminococcus sp. AM33-14	-1.52277	1.70542	0.371911	0.902969
g__Streptococcus;s__Streptococcus sp. 202	-1.51926	1.1937	0.203112	0.902969
g__Phocaeicola;s__Phocaeicola coprocola	-1.51912	2.0502	0.458717	0.951399
g__Peptoniphilus;s__Peptoniphilus tyrrelliae	-1.51906	1.56132	0.330587	0.902969
g__Streptococcus;s__Streptococcus danieliae	1.51893	1.12005	0.17506	0.902969
g__Alistipes;s__Alistipes sp. CAG:157	-1.5187	0.921691	0.0994073	0.902969
g__Edaphocola;s__Edaphocola aurantiacus	-1.51772	1.14273	0.184127	0.902969
g__Bacteroides;s__Bacteroides neonati	1.51566	0.483849	0.00173321	0.902969
g__Ruminococcus;s__Ruminococcus sp. AF19-15	1.51361	0.962034	0.115639	0.902969
g__Ruminococcus;s__Ruminococcus sp. KGMB03662	1.51017	0.973908	0.120991	0.902969
g__Clostridium;s__Clostridium sp. AF46-9NS	1.50835	0.710728	0.0338161	0.902969
g__Salinicoccus;s__Salinicoccus kekensis	-1.50726	1.3819	0.275398	0.902969
g__Coprobacillus;s__Coprobacillus sp. OM08-19	-1.50654	0.578411	0.00919755	0.902969
g__Veillonella;s__Veillonella montpellierensis	1.50361	1.04871	0.151638	0.902969
g__Pyramidobacter;s__uncultured Pyramidobacter sp.	-1.50347	1.02708	0.143242	0.902969
g__Limosilactobacillus;s__Limosilactobacillus mucosae	1.5033	1.1498	0.191063	0.902969
g__Streptococcus;s__Streptococcus sp. SS6	-1.50195	0.628798	0.0169126	0.902969
g__Clostridium;s__Clostridium sp. UBA1652	1.49957	1.13214	0.185321	0.902969
g__Fictibacillus;s__Fictibacillus gelatini	-1.49923	1.36002	0.270304	0.902969
g__Unclassified;s__Proteobacteria bacterium SG_bin6	-1.49863	0.834741	0.0726014	0.902969
g__Unclassified;s__Clostridia bacterium S502	-1.49841	1.36941	0.273865	0.902969
g__Prevotella;s__Prevotella sp. P6B4	-1.49638	1.32337	0.258169	0.902969
g__Collinsella;s__uncultured Collinsella sp.	-1.49583	0.997528	0.133734	0.902969
g__Cohnella;s__Cohnella sp. LGH	-1.49447	1.20951	0.216609	0.902969
g__Ruminococcus;s__Ruminococcus sp. AM29-10LB	1.49352	1.37704	0.278102	0.902969
g__Roseburia;s__Roseburia sp. CAG:309	1.49331	0.755534	0.048098	0.902969
g__Unclassified;s__Firmicutes bacterium ML8_F2	-1.49328	1.23576	0.226898	0.902969
g__Myceligenerans;s__Myceligenerans pegani	-1.49135	1.21417	0.219338	0.902969
g__Acetohalobium;s__Acetohalobium arabaticum	-1.48837	1.09155	0.172714	0.902969
g__Blautia;s__Blautia sp. BCRC 81119	-1.48747	1.66838	0.372626	0.902969
g__Enterobacter;s__Enterobacter sp. E1	-1.48487	1.43807	0.301817	0.902969
g__Bifidobacterium;s__Bifidobacterium longum	-1.48107	1.70122	0.383977	0.904254
g__Unclassified;s__Desulfitibacteraceae bacterium MK1	1.48048	1.55052	0.339665	0.902969
g__Coprobacillus;s__Coprobacillus sp. AF35-8	-1.48045	0.568868	0.0092562	0.902969
g__Bacteroides;s__Bacteroides sp. 51	1.48045	1.2567	0.238778	0.902969
g__Fictibacillus;s__Fictibacillus barbaricus	1.47885	0.970573	0.127587	0.902969
g__Pseudomonas;s__Pseudomonas sp. 9AZ	1.47819	0.638507	0.0206087	0.902969
g__Phocaeicola;s__Phocaeicola paurosaccharolyticus	1.47674	1.47714	0.317442	0.902969
g__Bifidobacterium;s__Bifidobacterium bifidum	-1.47551	2.14917	0.492367	0.975823
g__Weissella;s__Weissella cibaria	-1.47425	1.00976	0.144289	0.902969
g__Ligilactobacillus;s__Ligilactobacillus equi	-1.47234	1.24877	0.238388	0.902969
g__Senegalia;s__Senegalia massiliensis	1.47228	0.967704	0.128155	0.902969
g__Citrobacter;s__Citrobacter sp. RHBSTW-00881	-1.47218	1.313	0.262189	0.902969
g__Erwinia;s__Erwinia rhapontici	-1.4714	2.33389	0.5284	0.999823
g__Unclassified;s__Stenotrophomonas virus Jojan60	-1.47133	1.27892	0.249958	0.902969
g__Eubacterium;s__Eubacterium sp. BSD2780061688b_171218_H5	-1.46849	1.44216	0.308556	0.902969
g__Agrococcus;s__Agrococcus casei	-1.467	1.42717	0.303993	0.902969
g__Coprobacillus;s__Coprobacillus sp. AF29-3BH	-1.46621	0.634431	0.020829	0.902969
g__Collinsella;s__Collinsella sp. OM07-12	-1.4619	0.740364	0.0483163	0.902969
g__Unclassified;s__Candidatus Gastranaerophilales bacterium	-1.46071	1.29735	0.260201	0.902969
g__Clostridium;s__Clostridium sp. CAG:594	1.46071	0.830431	0.0785818	0.902969
g__Weissella;s__Weissella confusa	-1.46011	2.80832	0.603116	0.999823
g__Proteiniborus;s__Proteiniborus ethanoligenes	-1.45986	1.09821	0.183745	0.902969
g__Chryseobacterium;s__Chryseobacterium rhizoplanae	1.45866	1.00387	0.146214	0.902969
g__Lacicoccus;s__Lacicoccus alkaliphilus	-1.45447	1.22289	0.234295	0.902969
g__Clostridium;s__Clostridium brassicae	1.45266	0.894482	0.104369	0.902969
g__Peribacillus;s__Peribacillus simplex	1.45238	0.854629	0.0892391	0.902969
g__Bacteroides;s__Bacteroides rhinocerotis	1.44979	0.702116	0.038933	0.902969
g__Leptotrichia;s__Leptotrichia sp. OH3620_COT-345	-1.44735	1.01472	0.153767	0.902969
g__Faecalibacterium;s__Faecalibacterium sp. CAG:1138	1.44542	0.952528	0.129151	0.902969
g__Dysgonomonas;s__Dysgonomonas sp. GY617	-1.44493	1.37888	0.294685	0.902969
g__Unclassified;s__Candidatus Gastranaerophilales bacterium HUM_6	1.44441	1.47308	0.326821	0.902969
g__Unclassified;s__bacterium D16-34	-1.44432	0.835749	0.0839565	0.902969
g__Clostridium;s__Clostridium tetani	1.44391	0.758663	0.0570112	0.902969
g__Unclassified;s__Siphoviridae sp. ctDXu9	1.44289	0.977889	0.140075	0.902969
g__Bifidobacterium;s__Bifidobacterium pseudocatenulatum	-1.44043	2.26894	0.525529	0.998413
g__Corynebacterium;s__Corynebacterium phoceense	-1.43912	1.04256	0.167472	0.902969
g__Ruminococcus;s__Ruminococcus sp. AF37-20	1.43909	0.936863	0.12452	0.902969
g__Unclassified;s__Myoviridae sp. ct5xZ3	1.43734	1.50293	0.338891	0.902969
g__Streptomyces;s__Streptomyces gobiensis	-1.43598	1.21921	0.238875	0.902969
g__Alkaliphilus;s__Alkaliphilus serpentinus	1.43561	1.19598	0.229997	0.902969
g__Parabacteroides;s__Parabacteroides sp. An277	1.43455	1.1361	0.206696	0.902969
g__Clostridium;s__Clostridium sp. CAG:524	1.43443	0.954208	0.13277	0.902969
g__Clostridium;s__Clostridium sp. Ade.TY	-1.43301	0.946367	0.129969	0.902969
g__Vibrio;s__Vibrio viridaestus	1.43294	1.57768	0.36374	0.902969
g__Lactococcus;s__Lactococcus petauri	-1.42944	0.669922	0.0328638	0.902969
g__Paenibacillus;s__Paenibacillus beijingensis	1.42849	1.22619	0.244024	0.902969
g__Blautia;s__Blautia sp. MB18-30	-1.42439	0.565015	0.0117031	0.902969
g__Eubacterium;s__Eubacterium multiforme	1.41804	0.854553	0.0970371	0.902969
g__Ruminococcus;s__Ruminococcus sp. AF18-29	1.41755	0.82557	0.0859683	0.902969
g__Unclassified;s__candidate division CPR2 bacterium GWD2_39_7	-1.41676	0.881456	0.107989	0.902969
g__Unclassified;s__Rickettsiaceae bacterium	-1.41629	0.992765	0.153691	0.902969
g__Anaerospora;s__Anaerospora hongkongensis	-1.41594	1.08117	0.190318	0.902969
g__Bifidobacterium;s__Bifidobacterium oedipodis	-1.41567	1.27949	0.268538	0.902969
g__Paenibacillus;s__Paenibacillus sp. GP183	-1.41464	1.24052	0.254135	0.902969
g__Unclassified;s__Tissierellia bacterium S7-1-4	-1.41401	1.26272	0.26279	0.902969
g__Coprobacillus;s__Coprobacillus sp. AF24-1LB	-1.41145	0.593835	0.0174615	0.902969
g__Bacteroides;s__Bacteroides humanifaecis	1.40865	1.12713	0.211386	0.902969
g__Hominibacterium;s__Hominibacterium faecale	-1.40797	1.77807	0.428448	0.932659
g__Proteus;s__Proteus mirabilis	-1.40752	1.81097	0.437032	0.93753
g__Clostridium;s__Clostridium sp. CAG:465	1.4073	1.18266	0.234069	0.902969
g__Enterobacter;s__Enterobacter sp. 18A13	-1.40554	1.40581	0.317401	0.902969
g__Unclassified;s__Siphoviridae sp. ctquf9	-1.40515	1.09917	0.20112	0.902969
g__Unclassified;s__Cyanobacteria bacterium 13_1_20CM_4_61_6	-1.4043	1.38423	0.310344	0.902969
g__Youngiibacter;s__Youngiibacter fragilis	1.40357	0.636162	0.0273623	0.902969
g__Ruminiclostridium;s__Ruminiclostridium herbifermentans	1.40022	0.690407	0.0425497	0.902969
g__Vibrio;s__Vibrio agarivorans	1.39581	0.979628	0.154204	0.902969
g__Bacillus;s__Bacillus mojavensis	1.39494	0.885694	0.115265	0.902969
g__Jeotgalibaca;s__Jeotgalibaca porci	-1.39345	1.46293	0.340838	0.902969
g__Helicobacter;s__Helicobacter winghamensis	1.39305	1.48117	0.346959	0.902969
g__Anaerosalibacter;s__Anaerosalibacter massiliensis	-1.39286	0.910279	0.125981	0.902969
g__Zhenpiania;s__Zhenpiania hominis	-1.39283	2.1309	0.513345	0.992956
g__Paenibacillus;s__Paenibacillus methanolicus	1.39236	1.42467	0.328407	0.902969
g__Globicatella;s__Globicatella sulfidifaciens	1.38848	1.33643	0.298827	0.902969
g__Enterobacter;s__Enterobacter sp. MGH 38	-1.38845	1.32185	0.293541	0.902969
g__Pauljensenia;s__Pauljensenia sp. UMB1177	-1.38391	1.69988	0.415575	0.92264
g__Moraxella;s__Moraxella sp.	1.38131	0.678061	0.0416359	0.902969
g__Unclassified;s__Siphoviridae sp. ctmYS12	-1.38093	0.941036	0.142251	0.902969
g__Neobacillus;s__Neobacillus endophyticus	1.37978	1.35212	0.307513	0.902969
g__Periweissella;s__Periweissella fabaria	-1.37905	1.07427	0.199244	0.902969
g__Alicyclobacillus;s__Alicyclobacillus tolerans	1.37858	0.915286	0.132024	0.902969
g__Paenarthrobacter;s__Paenarthrobacter nicotinovorans	-1.37857	0.90433	0.127406	0.902969
g__Ruminococcus;s__Ruminococcus sp. TM463	1.37746	0.910668	0.130387	0.902969
g__Bacillus;s__Bacillus sp. CAG:988	1.37719	1.22855	0.262294	0.902969
g__Coprobacillus;s__Coprobacillus sp. AM18-4LB-d2	-1.37486	0.887818	0.121482	0.902969
g__Prevotella;s__Prevotella pallens	1.3722	0.632536	0.0300546	0.902969
g__Unclassified;s__Ackermannviridae sp.	-1.37217	0.779271	0.0782659	0.902969
g__Halanaerobium;s__Halanaerobium congolense	1.36933	1.98944	0.491264	0.975787
g__Lawsonibacter;s__Lawsonibacter sp.	1.3682	0.441621	0.00194752	0.902969
g__Paenibacillus;s__Paenibacillus sp. CF384	-1.36796	1.27495	0.283292	0.902969
g__Clostridium;s__Clostridium manihotivorum	1.36504	0.816769	0.0946682	0.902969
g__Eggerthella;s__Eggerthella sp. CAG:368	-1.36483	0.7567	0.0712841	0.902969
g__Paenibacillus;s__Paenibacillus sp. Soil787	-1.36298	0.997272	0.171717	0.902969
g__Clostridium;s__Clostridium sp. 26_22	-1.36195	1.55073	0.379803	0.903855
g__Magnetospirillum;s__Magnetospirillum sp. 64-120	1.36025	1.31933	0.302532	0.902969
g__Macrococcoides;s__Macrococcoides caseolyticum	-1.35917	0.956188	0.155188	0.902969
g__Psychrobacillus;s__Psychrobacillus sp. INOP01	1.35822	1.65497	0.411821	0.920225
g__Coprobacillus;s__Coprobacillus sp. AF16-47	-1.35789	0.578003	0.0188097	0.902969
g__Breznakia;s__Breznakia pachnodae	1.35732	0.632412	0.0318522	0.902969
g__Faecalibacillus;s__Faecalibacillus intestinalis	-1.35587	1.32364	0.305671	0.902969
g__Dysgonomonas;s__Dysgonomonas sp. HDW5B	-1.35569	1.40628	0.335034	0.902969
g__Blautia;s__Blautia fusiformis	-1.35396	1.45907	0.353429	0.902969
g__Enterococcus;s__Enterococcus sp. CU9D	1.35233	1.39604	0.332699	0.902969
g__Caldibacillus;s__Caldibacillus debilis	-1.3515	1.2855	0.293103	0.902969
g__Unclassified;s__Chloroflexi bacterium RBG_16_48_7	1.35106	0.995335	0.174656	0.902969
g__Tepidibacillus;s__Tepidibacillus fermentans	1.35062	0.84575	0.110276	0.902969
g__Bacteroides;s__Bacteroides gallinarum	1.3498	1.21354	0.266015	0.902969
g__Phycicoccus;s__Phycicoccus endophyticus	1.34743	1.54808	0.384089	0.904254
g__Veillonella;s__Veillonella sp. T34266-5	-1.34721	0.758428	0.0756798	0.902969
g__Unclassified;s__Bifidobacteriaceae bacterium MCC02035	-1.34597	0.855398	0.115602	0.902969
g__Unclassified;s__Siphoviridae sp. ctNEy24	-1.3451	1.53191	0.379916	0.903855
g__Streptococcus;s__Streptococcus sp. 1643	1.34464	1.1635	0.247811	0.902969
g__Ruminococcus;s__Ruminococcus sp. OM08-13AT	-1.34452	0.66026	0.0417154	0.902969
g__Lactobacillus;s__Lactobacillus gasseri	-1.3422	0.968039	0.165589	0.902969
g__Edwardsiella;s__Edwardsiella tarda	-1.34184	0.752498	0.0745562	0.902969
g__Coprobacillus;s__Coprobacillus sp. AM28-15LB	-1.34086	1.80683	0.458021	0.950994
g__Paenibacillus;s__Paenibacillus mucilaginosus	1.33982	1.81076	0.459349	0.951464
g__Parabacteroides;s__Parabacteroides pacaensis	1.33872	0.938037	0.153536	0.902969
g__Blautia;s__Blautia sp. LMAG:36	-1.33615	1.31804	0.310707	0.902969
g__Tepidanaerobacter;s__Tepidanaerobacter sp. GT38	1.33566	0.524377	0.0108612	0.902969
g__Hominimerdicola;s__Hominimerdicola aceti	1.33393	0.951583	0.160976	0.902969
g__Unclassified;s__Siphoviridae sp. cta6m1	1.33383	0.641543	0.0376089	0.902969
g__Blautia;s__Blautia sp. MCC270	-1.3334	0.63908	0.0369389	0.902969
g__Lactobacillus;s__Lactobacillus sp. CBA3606	1.33173	1.39037	0.338151	0.902969
g__Vagococcus;s__Vagococcus entomophilus	-1.33142	1.42114	0.348826	0.902969
g__Unclassified;s__Siphoviridae sp. ctUoe7	-1.33041	1.59379	0.403862	0.916603
g__Ruminococcus;s__Ruminococcus sp. AF27-12AA	-1.3292	0.643523	0.038875	0.902969
g__Unclassified;s__Erysipelotrichaceae bacterium 21_3	1.32712	0.617084	0.031506	0.902969
g__Unclassified;s__Myoviridae sp. ct5hB2	1.32644	1.22176	0.277622	0.902969
g__Coprobacillus;s__Coprobacillus sp. CAG:826	1.32546	1.30289	0.309	0.902969
g__Pararoseomonas;s__Pararoseomonas indoligenes	-1.32461	0.999884	0.185249	0.902969
g__Atopobium;s__Atopobium sp. HMSC064B08	-1.32193	0.778957	0.0896875	0.902969
g__Paraeggerthella;s__Paraeggerthella sp. Marseille-Q4926	1.32114	0.893719	0.139342	0.902969
g__Halobacillus;s__Halobacillus alkaliphilus	1.31825	1.51061	0.382846	0.903855
g__Anaeromyces;s__Anaeromyces robustus	1.31702	0.995385	0.185795	0.902969
g__Unclassified;s__Parcubacteria group bacterium GW2011_GWA2_42_14	1.31632	1.43559	0.359186	0.902969
g__Olsenella;s__Olsenella sp. An285	-1.31328	0.663831	0.0478908	0.902969
g__Akkermansia;s__Akkermansia glycaniphila	-1.31294	1.03789	0.205871	0.902969
g__Desulfitobacterium;s__Desulfitobacterium sp.	1.31276	1.13077	0.245666	0.902969
g__Kallipyga;s__Kallipyga gabonensis	1.31113	0.995361	0.18776	0.902969
g__Methanolobus;s__Methanolobus chelungpuianus	-1.3108	1.35357	0.332841	0.902969
g__Enterococcus;s__Enterococcus sp. S86.2	-1.30872	0.689873	0.0578217	0.902969
g__Phytohabitans;s__Phytohabitans rumicis	1.30845	1.33008	0.325245	0.902969
g__Barnesiella;s__Barnesiella sp. B2-R-119	-1.30364	0.967574	0.177875	0.902969
g__Caldicellulosiruptor;s__Caldicellulosiruptor owensensis	1.30211	1.67913	0.438063	0.93753
g__Halpernia;s__Halpernia frigidisoli	-1.302	1.07461	0.225664	0.902969
g__Unclassified;s__Bifidobacteriaceae bacterium MCC01958	-1.30123	0.490369	0.00796458	0.902969
g__Dubosiella;s__Dubosiella newyorkensis	1.29873	1.06732	0.223671	0.902969
g__Acidaminococcus;s__Acidaminococcus provencensis	1.29822	1.52805	0.395552	0.910611
g__Pectinatus;s__Pectinatus sottacetonis	1.29745	1.48489	0.382244	0.903855
g__Desulfosporosinus;s__Desulfosporosinus sp.	-1.29716	1.33941	0.332818	0.902969
g__Unclassified;s__Siphoviridae sp. ctZi05	1.29674	0.862331	0.132642	0.902969
g__Atopobium;s__Atopobium minutum	-1.29651	1.33455	0.331301	0.902969
g__Enterococcus;s__Enterococcus sp. DIV2402	-1.29561	0.744606	0.0818608	0.902969
g__Collinsella;s__Collinsella sp. An7	-1.2953	1.47889	0.381108	0.903855
g__Olsenella;s__Olsenella profusa	-1.29401	0.534553	0.0154891	0.902969
g__Coprobacillus;s__Coprobacillus sp. AM23-9LB	-1.29367	0.63878	0.042844	0.902969
g__Coprobacillus;s__Coprobacillus sp. AM26-5AC	-1.29305	1.01817	0.204093	0.902969
g__Enterobacter;s__Enterobacter wuhouensis	-1.29259	1.25301	0.302264	0.902969
g__Enterobacter;s__Enterobacter sp. LU1	-1.2903	1.34696	0.338094	0.902969
g__Xenorhabdus;s__Xenorhabdus nematophila	1.28971	1.55	0.40537	0.917765
g__Mycoplasma;s__Mycoplasma sp. CAG:956	1.28813	1.05458	0.221911	0.902969
g__Leuconostoc;s__Leuconostoc kimchii	-1.28807	1.57707	0.414071	0.921394
g__Streptomyces;s__Streptomyces sp. NBC_01433	-1.28698	1.20962	0.287351	0.902969
g__Methanobrevibacter;s__Methanobrevibacter boviskoreani	1.28697	1.56235	0.410089	0.919144
g__Butyrivibrio;s__Butyrivibrio sp. XPD2002	-1.28687	0.899309	0.152443	0.902969
g__Proteus;s__Proteus cibi	1.28666	1.18269	0.276632	0.902969
g__Faecalibacillus;s__Faecalibacillus sp. H12	-1.28554	0.728196	0.0775014	0.902969
g__Sutterella;s__Sutterella sp. AM18-8-1	1.28271	1.06852	0.22996	0.902969
g__Segatella;s__Segatella oris	1.28254	1.2329	0.298219	0.902969
g__Treponema;s__Treponema lecithinolyticum	-1.28242	0.86019	0.136	0.902969
g__Coprococcus;s__Coprococcus sp. AF38-1	1.28198	0.764476	0.0935532	0.902969
g__Bacteroides;s__Bacteroides sp. DH3716P	1.28138	0.627371	0.0411054	0.902969
g__Gryllotalpicola;s__Gryllotalpicola protaetiae	1.28137	1.19699	0.2844	0.902969
g__Treponema;s__Treponema denticola	1.28062	0.930676	0.168817	0.902969
g__Collinsella;s__Collinsella sp. AK_207A	-1.27964	0.928549	0.168171	0.902969
g__Unclassified;s__Myoviridae sp. ctVCj30	1.27924	1.34979	0.343265	0.902969
g__Neobacillus;s__Neobacillus cucumis	1.27742	1.30222	0.326616	0.902969
g__Heyndrickxia;s__Weizmannia acidilactici	-1.27705	0.939074	0.173861	0.902969
g__Olsenella;s__Olsenella timonensis	-1.27659	1.16594	0.273558	0.902969
g__Enterococcus;s__Enterococcus larvae	1.27581	1.27188	0.315821	0.902969
g__Coprobacillus;s__Coprobacillus sp. AM37-9BH	-1.27487	NA	NA	NA
g__Methanocorpusculum;s__Methanocorpusculum petauri	-1.27408	1.25127	0.308568	0.902969
g__Paenibacillus;s__Paenibacillus oralis	-1.27403	0.877058	0.146329	0.902969
g__Kosakonia;s__Kosakonia radicincitans	-1.27393	1.38967	0.359289	0.902969
g__Unclassified;s__Candidatus Bathyarchaeota archaeon	1.27364	1.18332	0.281785	0.902969
g__Citrobacter;s__Citrobacter sp. KTE151	-1.27295	1.0525	0.226488	0.902969
g__Ruminococcus;s__Ruminococcus sp. AM47-2BH	1.27273	0.887449	0.151531	0.902969
g__Ndongobacter;s__Ndongobacter massiliensis	1.27197	0.931795	0.172229	0.902969
g__Lactobacillus;s__Lactobacillus hominis	-1.27004	0.894526	0.155668	0.902969
g__Unclassified;s__Candidatus Woesebacteria bacterium RIFCSPLOWO2_01_FULL_39_10	1.26973	1.47309	0.388714	0.907501
g__Streptococcus;s__Streptococcus himalayensis	1.26942	1.59719	0.426739	0.930919
g__Cytobacillus;s__Cytobacillus firmus	1.26758	0.939068	0.177072	0.902969
g__Alistipes;s__Alistipes putredinis	-1.2664	2.39026	0.596238	0.999823
g__Unclassified;s__uncultured bacterium EB5	-1.26572	0.690488	0.06679	0.902969
g__Selenomonas;s__Selenomonas bovis	1.26413	1.3379	0.34473	0.902969
g__Clostridium;s__Clostridium sp. OM05-9BH	1.26378	1.1132	0.256265	0.902969
g__Unclassified;s__Siphoviridae sp. ctNLX12	1.26328	1.56274	0.418873	0.924244
g__Bacteroides;s__Bacteroides graminisolvens	1.26266	0.775812	0.103624	0.902969
g__Bifidobacterium;s__Bifidobacterium parmae	-1.2619	0.607917	0.0379151	0.902969
g__Paenibacillus;s__Paenibacillus oryzisoli	1.26119	1.33449	0.344619	0.902969
g__Hydrogenispora;s__Hydrogenispora ethanolica	1.2611	1.01852	0.215654	0.902969
g__Rodentibacter;s__Rodentibacter myodis	-1.26054	1.59519	0.429404	0.933016
g__Dialister;s__Dialister sp. CAG:588	1.25807	0.948831	0.184867	0.902969
g__Anaerotardibacter;s__Anaerotardibacter muris	-1.25582	0.915292	0.17005	0.902969
g__Olegusella;s__uncultured Olegusella sp.	-1.25474	1.40622	0.372245	0.902969
g__Nitrobacter;s__Nitrobacter winogradskyi	-1.25461	1.33512	0.347371	0.902969
g__Veillonella;s__Veillonella nakazawae	-1.25391	0.758787	0.0984295	0.902969
g__Clostridium;s__Clostridium sp. CAG_433_25_7	1.25292	1.76292	0.477265	0.964266
g__Coprobacillus;s__Coprobacillus sp. AM32-11LB	-1.2523	0.655709	0.0561537	0.902969
g__Olsenella;s__Olsenella sp. An270	-1.24871	0.928581	0.178707	0.902969
g__Clostridium;s__Clostridium sp. CAG:217	1.24809	1.59605	0.434221	0.936323
g__Palleniella;s__Palleniella muris	1.24651	0.846747	0.14099	0.902969
g__Clostridium;s__Clostridium sp. CAG:62	1.24646	0.959709	0.194016	0.902969
g__Blautia;s__Blautia sp. aa_0143	-1.2458	1.33815	0.35186	0.902969
g__Prevotella;s__Prevotella sp. CAG:592	1.24579	1.34585	0.354623	0.902969
g__Prevotella;s__Prevotella herbatica	-1.24542	2.16107	0.564416	0.999823
g__Enterococcus;s__Enterococcus alcedinis	1.24521	1.62266	0.44285	0.939881
g__Anaerostipes;s__Anaerostipes faecalis	1.24137	1.02513	0.225921	0.902969
g__Unclassified;s__Siphoviridae sp. ctv0N24	1.2407	1.73881	0.475517	0.962849
g__Salmonella;s__Salmonella bongori	-1.23987	0.995482	0.212951	0.902969
g__Levilactobacillus;s__Levilactobacillus brevis	1.23978	1.29337	0.337777	0.902969
g__Unclassified;s__Candidatus Hinthialibacteria bacterium OLB16	-1.23969	0.852405	0.14585	0.902969
g__Coprococcus;s__Coprococcus sp. AF19-8AC	1.23634	0.888355	0.164008	0.902969
g__Paraprevotella;s__uncultured Paraprevotella sp.	1.23446	0.944795	0.19135	0.902969
g__Canicola;s__Canicola haemoglobinophilus	-1.23438	1.38472	0.372699	0.902969
g__Ruminiclostridium;s__Ruminiclostridium josui	1.2336	0.774523	0.111222	0.902969
g__Paratissierella;s__Paratissierella segnis	1.23254	0.590429	0.0368406	0.902969
g__Clostridium;s__Clostridium sp. CAG:343	1.23194	1.54336	0.424743	0.929558
g__Desulfovibrio;s__Desulfovibrio sp. 6_1_46AFAA	-1.23115	1.13369	0.277492	0.902969
g__Pelolinea;s__Pelolinea submarina	1.23017	0.862949	0.154001	0.902969
g__Providencia;s__Providencia rettgeri	-1.22961	0.40147	0.00219302	0.902969
g__Clostridium;s__Clostridium sp. CAG:1219	1.22859	1.08507	0.257522	0.902969
g__Unclassified;s__Siphoviridae sp. ctHOG1	-1.22691	0.612918	0.0453119	0.902969
g__Anaerotruncus;s__Anaerotruncus sp. DFI.9.16	1.22617	0.758666	0.106046	0.902969
g__Veillonella;s__Veillonella faecalis	-1.22542	0.834466	0.141967	0.902969
g__Faecalibacterium;s__Faecalibacterium sp. Marseille-Q4164	-1.22529	0.663224	0.0646786	0.902969
g__Ruminococcus;s__Ruminococcus sp. AM34-10LB	1.22462	0.819322	0.134999	0.902969
g__Unclassified;s__virus sp. ctiha2	1.22438	0.905683	0.176411	0.902969
g__Unclassified;s__Euryarchaeota archaeon TMED255	-1.22389	1.2062	0.310266	0.902969
g__Ruminococcus;s__Ruminococcus sp. AM27-27	-1.22296	0.771585	0.112968	0.902969
g__Streptomyces;s__Streptomyces sp. CS113	-1.22236	1.28141	0.340125	0.902969
g__Ruminococcus;s__Ruminococcus sp. AF34-12	1.22141	0.933567	0.190761	0.902969
g__Clostridium;s__Clostridium sp. CAG:921	1.22133	1.27543	0.33827	0.902969
g__Leuconostoc;s__Leuconostoc lactis	-1.2209	0.810597	0.132024	0.902969
g__Coprobacillus;s__Coprobacillus sp. TF10-10	-1.21987	0.679429	0.0725852	0.902969
g__Oceanidesulfovibrio;s__Oceanidesulfovibrio marinus	1.21869	1.0997	0.267772	0.902969
g__Enterococcus;s__Enterococcus dongliensis	1.21834	0.866145	0.15954	0.902969
g__Faecalicoccus;s__uncultured Faecalicoccus sp.	-1.2172	0.475221	0.0104274	0.902969
g__Paenibacillus;s__Paenibacillus sp. LHD-38	1.21697	0.979746	0.214191	0.902969
g__Anaerococcus;s__uncultured Anaerococcus sp.	-1.21696	0.525356	0.0205339	0.902969
g__Leuconostoc;s__Leuconostoc inhae	-1.21682	1.08008	0.259912	0.902969
g__Oxalobacter;s__Oxalobacter paraformigenes	1.2163	0.979914	0.214519	0.902969
g__Pseudomonas;s__Pseudomonas sp. Irchel s3f7	1.21511	1.17603	0.301493	0.902969
g__Olsenella;s__Olsenella sp. TM06-36	1.21461	1.35355	0.369532	0.902969
g__Peribacillus;s__Peribacillus kribbensis	1.21408	1.31441	0.355657	0.902969
g__Terrisporobacter;s__Terrisporobacter mayombei	1.21403	0.579546	0.0361899	0.902969
g__Enterobacter;s__Enterobacter sp. C6	-1.21379	1.24401	0.329209	0.902969
g__Butyrivibrio;s__Butyrivibrio sp. LC3010	1.21342	0.944761	0.199014	0.902969
g__Citrobacter;s__Citrobacter sp. TSA-1	-1.21339	1.54013	0.430783	0.933932
g__Phocaeicola;s__Phocaeicola acetigenes	1.21323	1.16002	0.295622	0.902969
g__Methanobrevibacter;s__Methanobrevibacter sp. UBA212	-1.21227	1.48834	0.415352	0.922337
g__Unclassified;s__Siphoviridae sp. ctPJC19	1.21146	1.63301	0.458174	0.950994
g__Clostridium;s__Clostridium chauvoei	1.21143	1.46888	0.409525	0.919144
g__Leuconostoc;s__Leuconostoc citreum	-1.20996	2.12953	0.56991	0.999823
g__Phocaeicola;s__Phocaeicola faecium	1.20977	0.898225	0.178031	0.902969
g__Unclassified;s__Ruminococcaceae bacterium FB2012	1.20859	0.647905	0.0621272	0.902969
g__Unclassified;s__Clostridiales bacterium GWC2_40_7	1.20771	0.692826	0.0813053	0.902969
g__Coprobacillus;s__Coprobacillus sp. AM42-12AC	-1.20725	0.734226	0.100125	0.902969
g__Parabacteroides;s__Parabacteroides segnis	-1.20725	1.32028	0.360512	0.902969
g__Allocoprobacillus;s__Allocoprobacillus halotolerans	1.2059	0.524875	0.0215903	0.902969
g__Glaesserella;s__Glaesserella parasuis	-1.20538	1.15348	0.296026	0.902969
g__Bacteroides;s__Bacteroides sp. AF37-16AC	1.20514	1.43725	0.401749	0.914549
g__Unclassified;s__Clostridia bacterium 41_269	-1.20492	1.30261	0.354963	0.902969
g__Clostridium;s__Clostridium sp. VAP41	1.20296	1.38313	0.384445	0.904289
g__Caloranaerobacter;s__Caloranaerobacter azorensis	1.20191	1.25633	0.338727	0.902969
g__Helcococcus;s__Helcococcus sueciensis	1.19993	1.60767	0.455438	0.950022
g__Clostridium;s__Clostridium sp. OM05-6BH	1.19969	0.536252	0.0252753	0.902969
g__Kluyvera;s__Kluyvera cryocrescens	-1.19926	1.00588	0.233165	0.902969
g__Flagellimonas;s__Flagellimonas nanhaiensis	1.19812	1.22354	0.327473	0.902969
g__Geoglobus;s__Geoglobus acetivorans	-1.19657	1.20094	0.319077	0.902969
g__Lactobacillus;s__Lactobacillus johnsonii	-1.19487	0.780522	0.125804	0.902969
g__Tannerella;s__Tannerella sp. AF04-6	1.19385	1.57657	0.448902	0.94552
g__Gleimia;s__Gleimia sp. 6138-11-ORH1	-1.19364	1.31486	0.363979	0.902969
g__Streptococcus;s__Streptococcus sp. IsoGale022	1.19281	0.669461	0.0747904	0.902969
g__Paenibacillus;s__Paenibacillus pinistramenti	-1.1919	1.10887	0.282429	0.902969
g__Unclassified;s__Siphoviridae sp. ctRGt12	-1.19126	0.596164	0.045695	0.902969
g__Unclassified;s__Myoviridae sp. ctVeR24	1.19094	1.66198	0.473634	0.961782
g__Collinsella;s__Collinsella intestinalis	-1.19037	2.17335	0.58389	0.999823
g__Bacillus;s__Bacillus sp. B14905	-1.18975	0.421666	0.00477918	0.902969
g__Coprothermobacter;s__Coprothermobacter proteolyticus	1.18955	0.910333	0.191309	0.902969
g__Mycobacterium;s__Mycobacterium marinum	-1.18785	0.637363	0.0623643	0.902969
g__Butyrivibrio;s__Butyrivibrio sp. YAB3001	1.18763	0.629121	0.0590581	0.902969
g__Bacteroides;s__Bacteroides sp. AF04-22	1.18734	0.888594	0.181485	0.902969
g__Megasphaera;s__Megasphaera sp. SW808	1.18651	1.3053	0.363352	0.902969
g__Asaccharospora;s__Asaccharospora irregularis	1.18575	0.721897	0.100475	0.902969
g__Unclassified;s__Myoviridae sp. ctOv05	-1.18551	1.27718	0.353292	0.902969
g__Enterococcus;s__Enterococcus sp. OL5	1.18549	1.46962	0.419862	0.92518
g__Vagococcus;s__Vagococcus hydrophili	-1.18528	1.12064	0.290199	0.902969
g__Unclassified;s__Bifidobacteriaceae bacterium MCC01951	-1.18489	0.574281	0.0390887	0.902969
g__Halonatronomonas;s__Halonatronomonas betaini	1.18456	1.53584	0.440542	0.938199
g__Coprococcus;s__Coprococcus sp. CAG:131_42_139	1.184	0.637532	0.0632874	0.902969
g__Fusibacter;s__Fusibacter bizertensis	1.18269	0.913732	0.195546	0.902969
g__Unclassified;s__Siphoviridae sp. ctaLC6	-1.18253	1.74261	0.497394	0.980086
g__Clostridium;s__Clostridium sp. AF23-8	-1.18241	0.674432	0.0795685	0.902969
g__Clostridium;s__Clostridium cochlearium	-1.18215	1.2502	0.34437	0.902969
g__Unclassified;s__Siphoviridae sp. ctuvi3	1.18179	1.52882	0.439516	0.93753
g__Pisciglobus;s__Pisciglobus halotolerans	-1.18052	1.71977	0.492437	0.975823
g__Lederbergia;s__Lederbergia ruris	1.17998	1.33491	0.37673	0.902969
g__Acetoanaerobium;s__Acetoanaerobium noterae	1.17974	0.904421	0.192091	0.902969
g__Coprobacillus;s__Coprobacillus sp. AF27-24BH	-1.17965	0.814282	0.147421	0.902969
g__Aliidongia;s__Aliidongia dinghuensis	-1.17858	1.63002	0.469651	0.959304
g__Allisonella;s__uncultured Allisonella sp.	-1.1777	1.9864	0.553262	0.999823
g__Neisseria;s__Neisseria sp. HMSC061B04	1.17762	1.40196	0.40092	0.914429
g__Novosphingobium;s__Novosphingobium profundi	-1.1776	1.17987	0.318245	0.902969
g__Dysgonomonas;s__Dysgonomonas mossii	1.17736	0.87749	0.17968	0.902969
g__Ornithinibacillus;s__Ornithinibacillus californiensis	1.17703	1.2601	0.350265	0.902969
g__Riemerella;s__Riemerella anatipestifer	-1.17697	1.19008	0.322672	0.902969
g__Peptoclostridium;s__Peptoclostridium sp.	-1.17682	1.31116	0.369432	0.902969
g__Escherichia;s__Escherichia sp. E4208	-1.17417	1.15314	0.308565	0.902969
g__Butyrivibrio;s__Butyrivibrio sp. INlla21	1.1738	0.899414	0.191869	0.902969
g__Coprobacillus;s__Coprobacillus sp. 8_1_38FAA	-1.17313	1.50447	0.435531	0.936536
g__Deefgea;s__Deefgea tanakiae	-1.17244	1.44101	0.415861	0.922776
g__Rhodococcus;s__Rhodococcus erythropolis	-1.17237	1.42259	0.409876	0.919144
g__Streptococcus;s__Streptococcus sp. SV2	-1.17165	0.443816	0.00829216	0.902969
g__Bacteroides;s__Bacteroides sp. Marseille-P3684	1.1702	0.555605	0.0351901	0.902969
g__Ruminococcus;s__Ruminococcus sp. CAG:17	-1.16858	1.96813	0.552678	0.999823
g__Citrobacter;s__Citrobacter rodentium	-1.16775	1.62394	0.472089	0.960952
g__Methanobacterium;s__Methanobacterium sp. CWC-01	-1.1675	0.986037	0.236399	0.902969
g__Blautia;s__Blautia sp. CAG:52	-1.16716	1.87077	0.532697	0.999823
g__Clostridium;s__Clostridium peptidivorans	1.16642	0.910352	0.200092	0.902969
g__Bacteroides;s__Bacteroides sp. AF15-23LB	1.16642	1.32897	0.380112	0.903855
g__Campylobacter;s__Campylobacter concisus	1.16586	0.936353	0.213091	0.902969
g__Anaerococcus;s__Anaerococcus sp. HMSC065G05	-1.16481	1.42516	0.413745	0.921394
g__Unclassified;s__Firmicutes bacterium CAG:631	-1.16413	1.03478	0.260587	0.902969
g__Clostridium;s__Clostridium tyrobutyricum	1.16369	0.636247	0.0674014	0.902969
g__Ruminococcus;s__Ruminococcus sp. AF17-1AC	1.16323	1.02762	0.25765	0.902969
g__Peptostreptococcus;s__Peptostreptococcus sp. CBA3647	-1.16308	0.503297	0.0208375	0.902969
g__Olsenella;s__Olsenella porci	-1.16145	0.831455	0.162446	0.902969
g__Paraprevotella;s__Paraprevotella sp.	1.16128	0.83034	0.161945	0.902969
g__Alistipes;s__Alistipes sp. AF48-12	-1.16111	0.58803	0.0483168	0.902969
g__Alistipes;s__Alistipes sp. CHKCI003	-1.1607	0.797266	0.145434	0.902969
g__Bacteroides;s__Bacteroides sp. CAG:20	-1.16042	0.771726	0.132666	0.902969
g__Enterobacter;s__Enterobacter sp. RIT 418	-1.15971	1.10658	0.294633	0.902969
g__Ruminococcus;s__Ruminococcus sp. TF10-12AC	-1.15968	0.556923	0.0373151	0.902969
g__Propionibacterium;s__Propionibacterium freudenreichii	1.15952	1.52302	0.446461	0.943459
g__Prevotella;s__Prevotella sp. CAG:487	1.15928	0.529653	0.0286148	0.902969
g__Unclassified;s__Firmicutes bacterium CAG:466	1.15904	0.766128	0.130316	0.902969
g__Clostridium;s__Clostridium polynesiense	1.15878	0.581463	0.0462752	0.902969
g__Ligilactobacillus;s__Ligilactobacillus sp. Marseille-Q7487	1.15871	0.818323	0.156788	0.902969
g__Prevotella;s__Prevotella koreensis	1.15803	1.77951	0.515203	0.994298
g__Coprococcus;s__Coprococcus sp. AF16-5	1.15674	0.809657	0.153097	0.902969
g__Unclassified;s__Caudovirales sp. ctVfb8	-1.15668	0.561079	0.0392529	0.902969
g__Lacticigenium;s__Lacticigenium naphthae	1.15666	1.09621	0.291357	0.902969
g__Desnuesiella;s__Desnuesiella massiliensis	1.15644	0.735553	0.115904	0.902969
g__Unclassified;s__Candidatus Roizmanbacteria bacterium RIFCSPLOWO2_01_FULL_44_13	-1.15635	1.31495	0.379191	0.903855
g__Coprobacillus;s__Coprobacillus sp. AF02-13	-1.15555	0.620933	0.0627465	0.902969
g__Blautia;s__Blautia sp. SF-50	-1.15549	1.30848	0.377193	0.902969
g__Moorella;s__Moorella sulfitireducens	1.1551	0.92695	0.212715	0.902969
g__Coprobacillus;s__Coprobacillus sp. TM10-10	-1.15459	0.747964	0.122674	0.902969
g__Unclassified;s__Siphoviridae sp. ctj7g1	-1.15445	1.64271	0.482197	0.968138
g__Anaerocolumna;s__uncultured Anaerocolumna sp.	1.15433	1.13407	0.308742	0.902969
g__Unclassified;s__Patescibacteria group bacterium	1.15417	0.673564	0.0866143	0.902969
g__Ruminococcus;s__Ruminococcus sp. AM23-1	-1.15385	1.53406	0.451961	0.947454
g__Gulosibacter;s__Gulosibacter hominis	-1.153	1.48232	0.436666	0.937495
g__Caloramator;s__Caloramator australicus	-1.15184	1.40449	0.412152	0.920225
g__Thermobrachium;s__Thermobrachium celere	1.1508	0.755142	0.127522	0.902969
g__Romboutsia;s__Romboutsia hominis	1.15016	0.791003	0.14593	0.902969
g__Ruminococcus;s__Ruminococcus sp. AF25-17	-1.14903	0.885444	0.194396	0.902969
g__Unclassified;s__Siphoviridae sp. ctPyh10	1.14845	0.952061	0.227712	0.902969
g__Rothia;s__Rothia sp. HMSC066H02	-1.14761	0.856145	0.180103	0.902969
g__Ruminococcus;s__Ruminococcus sp. AF25-3LB	-1.14659	0.726165	0.114343	0.902969
g__Unclassified;s__Myoviridae sp. ct2DO6	1.14604	1.04501	0.272783	0.902969
g__Pseudobutyrivibrio;s__Pseudobutyrivibrio sp. YE44	1.14507	0.762218	0.133025	0.902969
g__Helicobacter;s__uncultured Helicobacter sp.	-1.14473	1.26225	0.364463	0.902969
g__Paraeggerthella;s__Paraeggerthella hongkongensis	1.14459	1.77695	0.519491	0.996215
g__Clostridium;s__Clostridium sp. 42_12	1.14392	0.740788	0.122541	0.902969
g__Clostridium;s__Clostridium sp. AM42-36	-1.14385	0.968721	0.237687	0.902969
g__Unclassified;s__Ruminococcaceae bacterium YAD3003	1.14293	0.881291	0.194671	0.902969
g__Clostridium;s__Clostridium sp. CAG:264	1.1426	1.0414	0.272562	0.902969
g__Thermovenabulum;s__Thermovenabulum gondwanense	1.14245	0.988497	0.247785	0.902969
g__Unclassified;s__[Eubacterium] hominis	1.14217	0.866904	0.187663	0.902969
g__Unclassified;s__Candidatus Gastranaerophilales bacterium HUM_7	1.14213	1.40806	0.417288	0.922962
g__Streptococcus;s__Streptococcus sp. 22.1	1.14073	1.19245	0.338755	0.902969
g__Anaerocolumna;s__Anaerocolumna sp. MB42-C2	1.1401	0.436272	0.00896785	0.902969
g__Gracilibacillus;s__Gracilibacillus alcaliphilus	-1.13788	1.42808	0.425573	0.930415
g__Haemophilus;s__Haemophilus parainfluenzae	1.13711	2.89218	0.694195	0.999823
g__Pantoea;s__Pantoea sp. At-9b	1.13701	1.26355	0.368201	0.902969
g__Clostridium;s__Clostridium septicum	1.13692	0.871867	0.192232	0.902969
g__Spirosoma;s__Spirosoma pollinicola	-1.13501	0.597399	0.0574436	0.902969
g__Gemmiger;s__Gemmiger qucibialis	-1.13467	2.14265	0.596413	0.999823
g__Unclassified;s__Siphoviridae sp. ct9Y44	-1.13452	0.843034	0.17838	0.902969
g__Syntrophomonas;s__Syntrophomonas palmitatica	-1.13371	1.25636	0.36686	0.902969
g__Sellimonas;s__Sellimonas sp.	-1.13314	0.605267	0.0611878	0.902969
g__Listeria;s__Listeria ivanovii	-1.13295	1.11094	0.307819	0.902969
g__Suicoccus;s__Suicoccus acidiformans	-1.1321	1.18541	0.339565	0.902969
g__Eggerthella;s__uncultured Eggerthella sp. SMG5	-1.1313	1.27785	0.375986	0.902969
g__Bacteroides;s__Bacteroides sp. CAG:927	1.13122	1.12214	0.31341	0.902969
g__Bacteroides;s__Bacteroides difficilis	1.13103	0.550714	0.0399991	0.902969
g__Lachnoanaerobaculum;s__Lachnoanaerobaculum sp. JCM 36186	-1.13093	1.45977	0.438499	0.93753
g__Unclassified;s__Phage nd12	-1.13015	1.35378	0.403821	0.916603
g__Corynebacterium;s__Corynebacterium humireducens	1.12997	1.29612	0.383311	0.903855
g__Enterococcus;s__Enterococcus casseliflavus	-1.12994	0.800861	0.158272	0.902969
g__Prevotella;s__Prevotella sp. AGR2160	1.12845	0.542004	0.0373437	0.902969
g__Unclassified;s__Siphoviridae sp. ctjdk2	1.12839	0.746131	0.130453	0.902969
g__Unclassified;s__bacterium F083	1.12785	1.42487	0.428626	0.932856
g__Citrobacter;s__Citrobacter pasteurii	-1.12665	1.09443	0.303275	0.902969
g__Yersinia;s__Yersinia nurmii	-1.12503	0.910609	0.216655	0.902969
g__Klebsiella;s__Klebsiella pasteurii	-1.12487	1.14803	0.327173	0.902969
g__Citrobacter;s__Citrobacter sp. BIDMC107	-1.12394	1.80324	0.533095	0.999823
g__Citrobacter;s__Citrobacter sp.	-1.12279	1.23487	0.363228	0.902969
g__Parabacteroides;s__Parabacteroides sp. LFL-25	1.12174	1.36824	0.412308	0.920225
g__Ruminococcus;s__Ruminococcus sp. CAG:55	-1.12149	0.57977	0.0530685	0.902969
g__Unclassified;s__mixed culture bacterium CF_gF3SD01_19	-1.12065	1.4247	0.431525	0.934564
g__Anaerocolumna;s__Anaerocolumna sp. AGMB13020	1.11974	0.694059	0.106676	0.902969
g__Desulfosporosinus;s__Desulfosporosinus metallidurans	1.1196	0.894835	0.210871	0.902969
g__Ruminococcus;s__Ruminococcus sp. AM49-8	-1.11957	0.623614	0.0726059	0.902969
g__Unclassified;s__virus sp. ctmTa7	-1.11924	0.672106	0.0958582	0.902969
g__Latilactobacillus;s__Latilactobacillus sakei	-1.11873	0.643694	0.0822149	0.902969
g__Clostridium;s__Clostridium sp. CAG:492	1.11828	1.45807	0.443105	0.940046
g__Bifidobacterium;s__Bifidobacterium thermophilum	-1.11759	0.803914	0.16447	0.902969
g__Butyrivibrio;s__Butyrivibrio sp. WCD3002	1.11705	1.23304	0.364971	0.902969
g__Kluyvera;s__Kluyvera sichuanensis	-1.11688	1.74078	0.521134	0.997367
g__Dialister;s__Dialister micraerophilus	-1.11682	1.17371	0.341337	0.902969
g__Unclassified;s__Gemmatimonadales bacterium	-1.11677	1.50507	0.458085	0.950994
g__Paludibacter;s__Paludibacter sp. 221	1.1165	0.921291	0.225556	0.902969
g__Streptococcus;s__Streptococcus sp. 16.1	-1.11638	1.1876	0.347201	0.902969
g__Geobacillus;s__Geobacillus thermodenitrificans	-1.11457	0.991667	0.261041	0.902969
g__Mucilaginibacter;s__Mucilaginibacter sp. 10B2	-1.11425	0.497626	0.0251473	0.902969
g__Propionispora;s__Propionispora hippei	1.11241	1.21937	0.361619	0.902969
g__Enterobacter;s__Enterobacter sp. KINAN-G	-1.11208	1.15156	0.334186	0.902969
g__Catonella;s__uncultured Catonella sp.	1.11174	1.04344	0.286669	0.902969
g__Desemzia;s__Desemzia sp. RIT 804	-1.11035	0.388217	0.00423474	0.902969
g__Pectinatus;s__Pectinatus frisingensis	1.10943	0.686679	0.106171	0.902969
g__Methanosarcina;s__Methanosarcina acetivorans	-1.10857	1.59091	0.485916	0.97119
g__Unclassified;s__Firmicutes bacterium AF12-30	-1.10852	1.6606	0.504426	0.986422
g__Unclassified;s__Siphoviridae sp. ctTXt1	1.10628	1.16543	0.342495	0.902969
g__Parabacteroides;s__Parabacteroides sp. AF19-14	1.10531	1.34008	0.409482	0.919144
g__Lactobacillus;s__Lactobacillus sp.	1.10398	1.32664	0.405315	0.917765
g__Paenibacillus;s__Paenibacillus ehimensis	1.102	1.32742	0.406434	0.918226
g__Blautia;s__Blautia sp. AM28-27	-1.10169	1.44514	0.44586	0.943445
g__Unclassified;s__Siphoviridae sp. ctpji4	-1.10114	1.09825	0.31604	0.902969
g__Enterobacter;s__uncultured Enterobacter sp.	-1.10036	1.16737	0.345888	0.902969
g__Collinsella;s__Collinsella sp. AM16-21	-1.09977	0.592254	0.0633209	0.902969
g__Paenibacillus;s__Paenibacillus germinis	1.09773	1.27954	0.390941	0.908145
g__Unclassified;s__Clostridiales bacterium GWE2_32_10	1.09732	1.16515	0.346301	0.902969
g__Selenomonas;s__Selenomonas sp.	1.09726	0.860522	0.202269	0.902969
g__Gemmiger;s__Gemmiger sp. An194	1.09647	0.534182	0.0401097	0.902969
g__Parasporobacterium;s__Parasporobacterium paucivorans	1.09599	1.09861	0.318466	0.902969
g__Shewanella;s__Shewanella xiamenensis	-1.09521	1.21079	0.365709	0.902969
g__Clostridium;s__Clostridium massiliodielmoense	-1.09516	1.56244	0.483346	0.96876
g__Clostridium;s__Clostridium yunnanense	-1.09508	1.57047	0.485618	0.970977
g__Paenibacillus;s__Paenibacillus harenae	1.09466	1.15782	0.344428	0.902969
g__Streptococcus;s__Streptococcus sp. SS4	1.09459	0.643865	0.0891249	0.902969
g__Unclassified;s__Firmicutes bacterium CAG:124	1.09448	2.03951	0.591517	0.999823
g__Bacteroides;s__Bacteroides sp. AF14-46	-1.0941	0.948281	0.248595	0.902969
g__Curtobacterium;s__Curtobacterium sp. ER1_6	-1.09385	1.12564	0.33117	0.902969
g__Parvimonas;s__Parvimonas sp.	1.09335	0.643796	0.0894529	0.902969
g__Clostridium;s__Clostridium sp. JN-9	1.09265	1.53237	0.47582	0.963034
g__Ruminococcus;s__Ruminococcus sp. AM09-18-1	-1.09196	0.609562	0.0732319	0.902969
g__Paenibacillus;s__Paenibacillus tritici	-1.09121	1.11207	0.326476	0.902969
g__Holdemanella;s__Holdemanella sp. DFI.5.21	1.09081	1.14099	0.339062	0.902969
g__Unclassified;s__Prevotellaceae bacterium	-1.08969	1.35704	0.421979	0.926379
g__Unclassified;s__Myoviridae sp. ctino4	-1.08908	0.518336	0.0356308	0.902969
g__Ruminococcus;s__Ruminococcus sp. 210702-SL.1.03	1.08836	0.706758	0.123578	0.902969
g__Paenibacillus;s__Paenibacillus periandrae	1.08792	0.86023	0.205985	0.902969
g__Unclassified;s__Enterobacteria phage HK225	1.08767	1.14498	0.342139	0.902969
g__Bacteroides;s__Bacteroides sp. MSK.20.12	1.08755	0.583776	0.0624675	0.902969
g__Flavobacterium;s__Flavobacterium sp. LPB0248	1.08708	0.646813	0.0928257	0.902969
g__Pelagicoccus;s__Pelagicoccus mobilis	1.08675	1.64099	0.507808	0.989549
g__Unclassified;s__Tenericutes bacterium ADurb.BinA124	1.08673	1.5608	0.486265	0.971433
g__Tannockella;s__Tannockella kyphosi	-1.08511	1.20202	0.366663	0.902969
g__Bradyrhizobium;s__Bradyrhizobium sp.	1.08484	1.31719	0.410167	0.919144
g__Unclassified;s__Siphoviridae sp. ct1gv6	-1.08446	1.42143	0.445504	0.943058
g__Oceanirhabdus;s__Oceanirhabdus seepicola	1.08307	1.07147	0.312101	0.902969
g__Robertmurraya;s__Robertmurraya massiliosenegalensis	1.08249	1.01993	0.288539	0.902969
g__Lachnoanaerobaculum;s__Lachnoanaerobaculum sp. OBRC5-5	1.08245	0.581272	0.0625745	0.902969
g__Alistipes;s__Alistipes indistinctus	-1.08242	2.85638	0.704726	0.999823
g__Peptoniphilus;s__Peptoniphilus lacydonensis	-1.082	1.00176	0.280098	0.902969
g__Clostridium;s__Clostridium hominis	1.07858	0.772642	0.162727	0.902969
g__Caldanaerobacter;s__Caldanaerobacter subterraneus	-1.07764	0.587896	0.0667961	0.902969
g__Hallella;s__Hallella mizrahii	-1.07743	2.28817	0.637735	0.999823
g__Streptococcus;s__Streptococcus bovimastitidis	-1.077	0.957015	0.26043	0.902969
g__Vibrio;s__Vibrio aquaticus	-1.07663	0.867217	0.214428	0.902969
g__Barnesiella;s__Barnesiella sp. WM24	1.07616	1.15341	0.350807	0.902969
g__Faecalibacillus;s__Faecalibacillus sp. MSK20_93	-1.07454	0.668072	0.107742	0.902969
g__Paenibacillus;s__Paenibacillus segetis	1.07428	1.36138	0.43005	0.933463
g__Alistipes;s__Alistipes sp. D31t1_170403_E11	-1.07366	1.16944	0.358566	0.902969
g__Bacillus;s__Bacillus sp. MRMR6	1.07153	0.985663	0.276985	0.902969
g__Massilimicrobiota;s__Massilimicrobiota sp. An80	-1.0712	NA	NA	NA
g__Slackia;s__Slackia piriformis	-1.07057	0.827	0.195486	0.902969
g__Butyrivibrio;s__Butyrivibrio sp. MC2013	1.06932	0.573215	0.0621152	0.902969
g__Proteiniphilum;s__Proteiniphilum sp. UBA5384	1.06849	0.731839	0.144288	0.902969
g__Leuconostoc;s__Leuconostoc mesenteroides	-1.06815	0.728099	0.142365	0.902969
g__Unclassified;s__Porphyromonadaceae bacterium COT-184 OH4590	-1.06815	1.59088	0.501954	0.98395
g__Butyrivibrio;s__Butyrivibrio sp. WCE2006	-1.06633	0.951069	0.262205	0.902969
g__Lancefieldella;s__Lancefieldella parvula	-1.06591	1.76037	0.544844	0.999823
g__Blautia;s__Blautia sp. AF32-4BH	-1.06506	1.60187	0.506123	0.987219
g__Hafnia;s__Hafnia paralvei	-1.06448	0.844209	0.207337	0.902969
g__Unclassified;s__Firmicutes bacterium HGW-Firmicutes-12	-1.06445	1.15246	0.355678	0.902969
g__Unclassified;s__Siphoviridae sp. ctCIv11	1.06286	1.01262	0.293896	0.902969
g__Unclassified;s__Siphoviridae sp. ctOba29	1.06217	0.954801	0.265944	0.902969
g__Unclassified;s__Bacteroidetes bacterium GWF2_40_14	1.05999	1.3423	0.429715	0.933117
g__Limosilactobacillus;s__Limosilactobacillus fermentum	-1.05828	1.76323	0.548376	0.999823
g__Brachybacterium;s__Brachybacterium timonense	-1.05803	1.4574	0.467856	0.958511
g__Unclassified;s__Coprobacillaceae bacterium	-1.05593	0.755131	0.162012	0.902969
g__Pelobacter;s__Pelobacter seleniigenes	1.05581	0.981296	0.281957	0.902969
g__Pseudomonas;s__Pseudomonas putida	-1.05578	1.36969	0.440818	0.938199
g__Pelosinus;s__Pelosinus sp. UFO1	-1.05568	1.1392	0.354087	0.902969
g__Corynebacterium;s__Corynebacterium sp. UMB9976	-1.05567	1.56822	0.500843	0.983044
g__Olsenella;s__Olsenella urininfantis	-1.0549	0.992283	0.287735	0.902969
g__Unclassified;s__Candidatus Melainabacteria bacterium LEY3_CP_29_8	1.05478	0.730968	0.149025	0.902969
g__Heyndrickxia;s__Heyndrickxia shackletonii	1.0542	1.4763	0.475175	0.96253
g__Klebsiella;s__Klebsiella sp. WP4-W18-ESBL-05	-1.05363	0.98254	0.28356	0.902969
g__Atopobium;s__Atopobium sp. ICM42b	-1.05265	0.580226	0.0696464	0.902969
g__Microvirga;s__Microvirga pakistanensis	-1.05246	0.996515	0.290906	0.902969
g__Cruoricaptor;s__Cruoricaptor ignavus	-1.05142	0.559253	0.0601009	0.902969
g__Haemophilus;s__Haemophilus sp. UMB1048	1.05069	0.703839	0.135489	0.902969
g__Anaerovirgula;s__Anaerovirgula multivorans	-1.05041	1.20325	0.382676	0.903855
g__Proteiniphilum;s__Proteiniphilum sp.	1.04991	1.41851	0.45921	0.951399
g__Dakarella;s__Dakarella massiliensis	1.04887	1.21174	0.386715	0.905201
g__Calorimonas;s__Calorimonas adulescens	1.04859	1.2671	0.407925	0.918226
g__Thermoanaerobacterium;s__Thermoanaerobacterium thermosaccharolyticum	1.04844	0.66081	0.112603	0.902969
g__Unclassified;s__Siphoviridae sp. ctQkj3	-1.04797	0.964886	0.277433	0.902969
g__Unclassified;s__uncultured bacterium Contig137	1.04727	1.06051	0.32339	0.902969
g__Serratia;s__Serratia plymuthica	-1.04725	1.18878	0.378348	0.903334
g__Anaerobranca;s__Anaerobranca gottschalkii	-1.04689	1.04882	0.318201	0.902969
g__Parabacteroides;s__Parabacteroides sp. CT06	-1.04672	1.63361	0.521691	0.997367
g__Ruminococcus;s__Ruminococcus sp. CAG:90	-1.04425	1.53249	0.495612	0.978278
g__Atopobium;s__Atopobium sp. BS2	-1.04424	0.58324	0.0733883	0.902969
g__Alistipes;s__Alistipes sp. UBA1686	-1.04344	1.39536	0.454586	0.949863
g__Peptostreptococcus;s__Peptostreptococcus canis	-1.04339	1.34599	0.438231	0.93753
g__Proteus;s__Proteus penneri	-1.04325	1.24763	0.403052	0.916195
g__Veillonella;s__Veillonella denticariosi	-1.04238	0.867666	0.229613	0.902969
g__Demequina;s__Demequina phytophila	-1.04121	1.30589	0.425262	0.930408
g__Brevibacillus;s__Brevibacillus humidisoli	1.04078	1.31696	0.42936	0.933016
g__Prevotella;s__Prevotella sp. CAG:755	1.04022	1.15977	0.369761	0.902969
g__Actinomyces;s__Actinomyces sp. 594	-1.0383	1.47545	0.481606	0.967501
g__Unclassified;s__Siphoviridae sp. ctxS04	-1.03813	1.29488	0.422717	0.927039
g__Fructilactobacillus;s__Fructilactobacillus sanfranciscensis	1.03799	1.19696	0.385838	0.904956
g__Abiotrophia;s__Abiotrophia sp. HMSC24B09	1.03798	0.735535	0.158188	0.902969
g__Corynebacterium;s__Corynebacterium canis	1.0376	0.799187	0.194176	0.902969
g__Enterococcus;s__Enterococcus nangangensis	-1.0374	1.45011	0.474367	0.962127
g__Clostridium;s__Clostridium sartagoforme	1.03602	0.978081	0.28949	0.902969
g__Unclassified;s__Firmicutes bacterium CAG:194	1.03601	0.689693	0.133062	0.902969
g__Eubacterium;s__Eubacterium sp. TM05-53	1.03528	1.31877	0.432433	0.934838
g__Nitratidesulfovibrio;s__Nitratidesulfovibrio vulgaris	1.03471	0.597708	0.0834287	0.902969
g__Serratia;s__Serratia liquefaciens	-1.03429	1.1532	0.36978	0.902969
g__Fibrobacter;s__Fibrobacter sp. UWB13	-1.03413	1.50086	0.490807	0.975787
g__Unclassified;s__Herelleviridae sp.	-1.03293	1.31995	0.43389	0.936323
g__Cohnella;s__Cohnella hashimotonis	-1.03273	0.694398	0.136954	0.902969
g__Pelorhabdus;s__Pelorhabdus rhamnosifermentans	1.03259	0.734317	0.159668	0.902969
g__Oscillibacter;s__Oscillibacter ruminantium	1.0322	0.58339	0.0768413	0.902969
g__Moorella;s__Moorella mulderi	1.03217	0.951806	0.278171	0.902969
g__Mobiluncus;s__uncultured Mobiluncus sp.	-1.03156	0.491853	0.035968	0.902969
g__Unclassified;s__Siphoviridae sp. cttiG1	-1.03143	1.61831	0.523896	0.998333
g__Unclassified;s__Candidatus Saccharibacteria bacterium RIFCSPHIGHO2_12_FULL_49_19	1.03138	0.763708	0.176859	0.902969
g__Parabacteroides;s__Parabacteroides sp. AF17-28	1.03089	1.14061	0.366099	0.902969
g__Veillonella;s__Veillonella caviae	-1.02956	0.727536	0.15703	0.902969
g__Petrotoga;s__Petrotoga sp. HKA.pet.4.5	-1.02886	1.06138	0.332362	0.902969
g__Clostridium;s__Clostridium sp. OM04-7	1.02821	1.57014	0.512564	0.992849
g__Citrobacter;s__Citrobacter sp. Cb034	-1.02784	1.7216	0.55049	0.999823
g__Thomasclavelia;s__Thomasclavelia ramosa	1.02752	1.572	0.513343	0.992956
g__Unclassified;s__Myoviridae sp. ctWXg38	1.02707	1.53534	0.503525	0.985799
g__Diaphorobacter;s__Diaphorobacter aerolatus	-1.02702	1.41256	0.467191	0.95833
g__Eubacterium;s__Eubacterium sp. ER2	-1.02686	0.698303	0.141424	0.902969
g__Bacteroides;s__Bacteroides sp. AF25-38AC	1.02652	0.533392	0.0542896	0.902969
g__Eubacterium;s__Eubacterium sp. 45_250	-1.02351	1.13596	0.367583	0.902969
g__Halanaerobium;s__Halanaerobium sp.	-1.02306	1.07207	0.33994	0.902969
g__Raoultella;s__Raoultella sp. NCTC 9187	-1.02235	1.25379	0.414839	0.921883
g__Clostridium;s__Clostridium gelidum	-1.02227	0.931574	0.272487	0.902969
g__Clostridium;s__Clostridium sp. CAG:12237_41	1.02216	0.821931	0.213642	0.902969
g__Lachnoclostridium;s__Lachnoclostridium sp. An118	-1.02207	1.43589	0.476586	0.963622
g__Unclassified;s__TM7 phylum sp. oral taxon 348	-1.02195	1.6537	0.536588	0.999823
g__Eubacterium;s__Eubacterium sp. CAG:156	-1.02174	0.992066	0.30305	0.902969
g__Propionibacterium;s__uncultured Propionibacterium sp.	-1.02139	0.929304	0.271726	0.902969
g__Unclassified;s__Siphoviridae sp. ctzr51	-1.02123	1.59688	0.522487	0.997893
g__Cyclobacterium;s__Cyclobacterium roseum	-1.02096	0.802165	0.203103	0.902969
g__Allorhizobium;s__Allorhizobium pseudoryzae	-1.02023	1.19385	0.39279	0.908595
g__Clostridium;s__Clostridium prolinivorans	1.02002	1.37769	0.459068	0.951399
g__Helicobacter;s__Helicobacter sp. MIT 05-5294	1.01953	1.54193	0.508482	0.989789
g__Eubacterium;s__Eubacterium sp. CAG:202	-1.01932	0.896394	0.255482	0.902969
g__Eggerthella;s__Eggerthella sp. BIOML-A1	-1.01931	0.554428	0.0659891	0.902969
g__Acidaminococcus;s__Acidaminococcus sp. AM05-11	1.01699	2.41651	0.673864	0.999823
g__Bordetella;s__Bordetella bronchiseptica	1.01672	1.18168	0.389568	0.907644
g__Streptococcus;s__Streptococcus sp. CF7_Ac1-8	-1.01665	1.09723	0.354153	0.902969
g__Collinsella;s__Collinsella sp. BA40	-1.0164	1.01603	0.317136	0.902969
g__Blautia;s__Blautia sp. LMAG:89	-1.01534	1.20157	0.398104	0.912522
g__Proteiniphilum;s__Proteiniphilum acetatigenes	1.01489	1.53787	0.509296	0.989913
g__Clostridium;s__Clostridium hydrogenum	-1.0146	0.915796	0.267908	0.902969
g__Unclassified;s__Bifidobacteriaceae bacterium MCC02031	1.01381	1.59717	0.52559	0.998413
g__Acholeplasma;s__Acholeplasma laidlawii	-1.0124	1.15516	0.380805	0.903855
g__Pumilibacter;s__Pumilibacter muris	1.01236	1.09105	0.353472	0.902969
g__Abiotrophia;s__uncultured Abiotrophia sp.	1.01174	0.756723	0.181223	0.902969
g__Adlercreutzia;s__Adlercreutzia mucosicola	-1.01156	0.6357	0.111551	0.902969
g__Gemmiger;s__Gemmiger sp. An87	1.01093	1.59459	0.5261	0.998413
g__Lelliottia;s__Lelliottia nimipressuralis	-1.0105	1.24465	0.416865	0.922776
g__Gardnerella;s__Gardnerella vaginalis	-1.01014	0.545114	0.0638712	0.902969
g__Clostridium;s__Clostridium formicaceticum	1.01012	0.812506	0.213789	0.902969
g__Unclassified;s__Alphaproteobacteria bacterium HGW-Alphaproteobacteria-13	-1.00992	0.857289	0.23878	0.902969
g__Veillonella;s__Veillonella sp. ICM51a	-1.00959	0.829724	0.223687	0.902969
g__Mesorhizobium;s__Mesorhizobium albiziae	1.00886	1.13802	0.375349	0.902969
g__Butyricimonas;s__Butyricimonas faecihominis	-1.00854	0.854164	0.237708	0.902969
g__Stoquefichus;s__Candidatus Stoquefichus massiliensis	1.00758	1.55343	0.516586	0.994805
g__Unclassified;s__uncultured bacterium Contig1756	-1.00757	0.934512	0.280953	0.902969
g__Mammaliicoccus;s__Mammaliicoccus sciuri	1.00716	0.648424	0.120364	0.902969
g__Dichloromethanomonas;s__Candidatus Dichloromethanomonas elyunquensis	-1.00664	1.61215	0.532359	0.999823
g__Unclassified;s__uncultured bacterium contig00034	1.00656	1.07235	0.347911	0.902969
g__Oliverpabstia;s__Oliverpabstia intestinalis	-1.00515	1.08829	0.355691	0.902969
g__Lactobacillus;s__Lactobacillus taiwanensis	-1.00431	1.46344	0.492545	0.975823
g__Gracilibacillus;s__Gracilibacillus massiliensis	-1.00247	0.906042	0.268543	0.902969
g__Eggerthella;s__Eggerthella hominis	-1.00225	0.476063	0.0352666	0.902969
g__Bifidobacterium;s__Bifidobacterium phasiani	-1.00111	0.605554	0.098288	0.902969
g__Unclassified;s__Tissierellia bacterium KA00581	-1.00103	0.786907	0.203337	0.902969
g__Romboutsia;s__Romboutsia sp. 1001713B170131_170501_G6	1.0009	0.850355	0.23918	0.902969
g__Clostridium;s__Clostridium sp. AM54-14XD	1.00071	0.696554	0.150813	0.902969
g__Aggregatibacter;s__Aggregatibacter sp. oral taxon 458	-0.999946	0.965975	0.300591	0.902969
g__Bradyrhizobium;s__Bradyrhizobium uaiense	-0.999767	0.623531	0.108847	0.902969
g__Unclassified;s__Siphoviridae sp. ct39g3	-0.999448	1.01962	0.326978	0.902969
g__Unclassified;s__Bryobacteraceae bacterium	-0.999412	1.17595	0.395393	0.910443
g__Pseudarthrobacter;s__Pseudarthrobacter siccitolerans	-0.998897	1.13085	0.377068	0.902969
g__Clostridium;s__Clostridium sp. CAG:245_30_32	0.997332	1.38851	0.472589	0.961782
g__Prevotella;s__Prevotella nigrescens	-0.997028	1.43547	0.487329	0.972446
g__Streptococcus;s__Streptococcus sp. Marseille-P8640	-0.996506	0.851793	0.242045	0.902969
g__Enterococcus;s__Enterococcus sp. 669A	0.996484	1.22748	0.4169	0.922776
g__Akkermansia;s__Akkermansia sp. BIOML-A52	-0.995838	1.02901	0.333163	0.902969
g__Treponema;s__Treponema sp. J25	0.995245	1.14329	0.384023	0.904254
g__Unclassified;s__Candidatus Poribacteria bacterium	-0.994544	0.979787	0.310077	0.902969
g__Collinsella;s__Collinsella sp. An268	0.994453	1.09246	0.36267	0.902969
g__Bifidobacterium;s__Bifidobacterium colobi	-0.994065	1.51682	0.512236	0.992827
g__Syntrophorhabdus;s__Syntrophorhabdus sp. PtaB.Bin027	0.993769	1.18639	0.402234	0.915062
g__Bifidobacterium;s__Bifidobacterium animalis	-0.993676	0.764554	0.193711	0.902969
g__Enterobacter;s__Enterobacter oligotrophicus	-0.993629	1.04115	0.339904	0.902969
g__Unclassified;s__Lachnospiraceae bacterium AM21-21	-0.993604	1.5542	0.522625	0.997893
g__Unclassified;s__Siphoviridae sp. cto3L1	-0.993178	0.623291	0.111061	0.902969
g__Trichococcus;s__Trichococcus flocculiformis	0.993171	0.789762	0.208552	0.902969
g__Unclassified;s__Cytophagaceae bacterium	-0.992887	1.22895	0.419141	0.924244
g__Crassaminicella;s__Crassaminicella profunda	0.992843	0.621515	0.110164	0.902969
g__Neisseria;s__Neisseria flavescens	-0.992766	0.969031	0.305602	0.902969
g__Hallella;s__Hallella absiana	0.992482	0.596961	0.0964011	0.902969
g__Paenibacillus;s__Paenibacillus cremeus	-0.991807	0.872865	0.255845	0.902969
g__Thomasclavelia;s__Erysipelatoclostridium sp. DFI.2.3	0.991199	0.681353	0.145738	0.902969
g__Streptococcus;s__Streptococcus parauberis	0.991175	0.548614	0.0708107	0.902969
g__Megasphaera;s__Megasphaera sp.	-0.989139	0.539873	0.0669258	0.902969
g__Unclassified;s__Candidatus Parcubacteria bacterium	0.988937	1.13057	0.381726	0.903855
g__Bacteroides;s__Bacteroides sp. ET225	0.987821	0.769622	0.199312	0.902969
g__Enterobacter;s__Enterobacter cloacae complex sp. CH23B	-0.987722	1.10375	0.370853	0.902969
g__Unclassified;s__Peptococcaceae bacterium CEB3	0.987061	1.27513	0.438878	0.93753
g__Enterobacter;s__Enterobacter sp. BIDMC92	-0.986764	1.22488	0.420473	0.925248
g__Enterobacter;s__Enterobacter cloacae complex sp. GF14B	-0.985581	1.36563	0.470476	0.95951
g__Bullifex;s__Bullifex sp.	0.983643	0.54451	0.0708444	0.902969
g__Bacteroides;s__Bacteroides sp. Marseille-P8574	0.981608	0.688133	0.15373	0.902969
g__Ruminococcus;s__Ruminococcus sp. AF17-12	-0.981016	1.78364	0.582314	0.999823
g__Aminipila;s__Aminipila butyrica	0.980825	1.63458	0.548475	0.999823
g__Methanomassiliicoccus;s__Candidatus Methanomassiliicoccus intestinalis	0.980821	0.92619	0.289606	0.902969
g__Propioniciclava;s__Propioniciclava sp.	-0.980695	1.48791	0.509825	0.989953
g__Tractidigestivibacter;s__Tractidigestivibacter montrealensis	0.980572	1.03765	0.344662	0.902969
g__Capnocytophaga;s__Capnocytophaga sp. oral taxon 332	-0.979724	1.88513	0.603265	0.999823
g__Unclassified;s__Siphoviridae sp. ctS2049	0.978782	0.447923	0.0288772	0.902969
g__Clostridium;s__Clostridium sp. WB02_MRS01	0.977889	0.612885	0.110589	0.902969
g__Unclassified;s__Siphoviridae sp. cteHV32	-0.977883	0.384062	0.0108915	0.902969
g__Paenibacillus;s__Paenibacillus dendrobii	-0.977224	0.706057	0.16634	0.902969
g__Eubacterium;s__Eubacterium sp. AF15-50	-0.977143	1.20681	0.418116	0.92383
g__Bacteroides;s__Bacteroides sp. 1001136B_160425_E2	0.976768	0.706441	0.166769	0.902969
g__Prevotella;s__Prevotella sp. LMAG:51	-0.975685	0.431058	0.023607	0.902969
g__Unclassified;s__Siphoviridae sp. ctqBH20	0.975246	1.07916	0.366152	0.902969
g__Clostridium;s__Clostridium sp. CAG:299	0.974315	2.16248	0.652311	0.999823
g__Acinetobacter;s__Acinetobacter parvus	-0.974143	1.71947	0.57103	0.999823
g__Megasphaera;s__Megasphaera sp. AM44-1BH	-0.973709	1.09296	0.372988	0.902969
g__Unclassified;s__Phage sp. cty4N14	0.973515	1.2581	0.439051	0.93753
g__Olsenella;s__Olsenella sp. SW781	-0.973371	1.08673	0.370419	0.902969
g__Unclassified;s__Myoviridae sp. ct3Oc10	-0.97329	0.887774	0.272936	0.902969
g__Clostridium;s__Clostridium sp. Marseille-P299	0.970961	1.39468	0.486312	0.971433
g__Scopulibacillus;s__Scopulibacillus daqui	-0.970874	1.4575	0.505332	0.986738
g__Collinsella;s__Collinsella aerofaciens	-0.96964	2.17183	0.655263	0.999823
g__Unclassified;s__virus sp. ctviY17	-0.969291	1.801	0.590441	0.999823
g__Bifidobacterium;s__Bifidobacterium adolescentis	-0.969177	2.06231	0.638392	0.999823
g__Eggerthella;s__Eggerthella sp. AM16-19	0.968743	0.857399	0.258534	0.902969
g__Enorma;s__Enorma phocaeensis	-0.968619	1.01294	0.338947	0.902969
g__Anaerotruncus;s__Anaerotruncus sp. CAG:528	0.968321	0.76585	0.206095	0.902969
g__Propionispora;s__Propionispora sp. 2_2-37	-0.9679	0.733898	0.18722	0.902969
g__Rothia;s__Rothia sp. HMSC064D08	-0.966966	1.1826	0.413549	0.921394
g__Parasutterella;s__Parasutterella secunda	0.966376	1.06982	0.366365	0.902969
g__Unclassified;s__Siphoviridae sp. ctHdl3	0.966123	1.24534	0.437872	0.93753
g__Fibrobacter;s__Fibrobacter sp. UWB1	0.966037	1.31328	0.46198	0.953745
g__Thermoclostridium;s__Thermoclostridium stercorarium	0.965822	0.469636	0.0397312	0.902969
g__Unclassified;s__Firmicutes bacterium AF16-15	-0.964677	2.02017	0.63299	0.999823
g__Ruminococcus;s__Ruminococcus sp. FMB-CY1	-0.964263	1.90038	0.611871	0.999823
g__Phascolarctobacterium;s__Phascolarctobacterium sp. CAG:266	0.964219	1.64853	0.558617	0.999823
g__Unclassified;s__Firmicutes bacterium ADurb.Bin354	-0.963959	1.14374	0.399335	0.914356
g__Petrocella;s__Petrocella atlantisensis	-0.963595	1.2543	0.44235	0.939384
g__Blautia;s__Blautia sp. TF11-31AT	-0.962142	1.3276	0.468624	0.958859
g__Fredinandcohnia;s__Fredinandcohnia onubensis	-0.961827	1.01081	0.341329	0.902969
g__Unclassified;s__Siphoviridae sp. ct8NQ14	-0.96099	0.769243	0.211568	0.902969
g__Bacteroides;s__Bacteroides zoogleoformans	0.960616	1.24704	0.441112	0.93826
g__Sellimonas;s__Sellimonas caecigallum	0.958581	0.790719	0.225401	0.902969
g__Ruminococcus;s__Ruminococcus sp. AM41-2AC	-0.957257	0.688813	0.164614	0.902969
g__Pedobacter;s__Pedobacter rhizosphaerae	0.956932	1.11231	0.38962	0.907644
g__Bacillus;s__Bacillus tuaregi	0.956747	1.23426	0.438246	0.93753
g__Ruminococcus;s__Ruminococcus sp. AF26-25AA	0.956444	1.07354	0.37297	0.902969
g__Anaerofustis;s__uncultured Anaerofustis sp.	0.956246	0.742497	0.197788	0.902969
g__Clostridium;s__Clostridium collagenovorans	-0.9551	0.930733	0.304807	0.902969
g__Serratia;s__Serratia ureilytica	-0.954817	0.537606	0.0757242	0.902969
g__Streptococcus;s__Streptococcus sp. 53	-0.954549	0.772862	0.2168	0.902969
g__Clostridium;s__Clostridium sp. 27_14	0.953039	1.2196	0.434545	0.936323
g__Herbihabitans;s__Herbihabitans rhizosphaerae	-0.951845	1.68998	0.573279	0.999823
g__Carboxydothermus;s__Carboxydothermus islandicus	0.951752	0.362503	0.00865209	0.902969
g__Terrisporobacter;s__Terrisporobacter petrolearius	0.951722	0.691993	0.169028	0.902969
g__Sphingomonas;s__Sphingomonas sp. G-3-2-10	0.950529	0.805664	0.238076	0.902969
g__Parabacteroides;s__Parabacteroides sp. B2-Q-110	0.950527	1.30682	0.467006	0.95833
g__Unclassified;s__Lachnospiraceae bacterium 7_1_58FAA	0.950515	1.88964	0.614955	0.999823
g__Lagierella;s__Lagierella massiliensis	0.950003	0.956677	0.320699	0.902969
g__Bartonella;s__Bartonella schoenbuchensis	-0.949764	0.774222	0.219923	0.902969
g__Unclassified;s__Siphoviridae sp. ctHip2	-0.94892	0.847841	0.263047	0.902969
g__Bacteroides;s__Bacteroides sp. AF35-22	-0.948913	1.17819	0.420591	0.925248
g__Coprococcus;s__Coprococcus sp. OM06-25	0.948793	0.597905	0.112544	0.902969
g__Sinanaerobacter;s__Sinanaerobacter sp. ZZT-01	0.948336	0.457125	0.0380266	0.902969
g__Sporolactobacillus;s__Sporolactobacillus nakayamae	-0.945941	1.37518	0.491536	0.975787
g__Faecalibacterium;s__Faecalibacterium sp. BCRC 81149	-0.94564	1.80394	0.600134	0.999823
g__Limosilactobacillus;s__Limosilactobacillus coleohominis	0.945408	0.53424	0.0767884	0.902969
g__Actinomyces;s__Actinomyces sp. oral taxon 448	-0.945218	1.68195	0.574132	0.999823
g__Dehalogenimonas;s__Dehalogenimonas lykanthroporepellens	0.945185	1.34266	0.481456	0.967385
g__Amulumruptor;s__Candidatus Amulumruptor caecigallinarius	0.945163	0.757797	0.212305	0.902969
g__Adlercreutzia;s__Adlercreutzia equolifaciens	-0.944818	2.5168	0.70736	0.999823
g__Corynebacterium;s__Corynebacterium lizhenjunii	0.943589	1.16385	0.417509	0.922994
g__Unclassified;s__TM7 phylum sp. oral taxon 353	-0.94343	1.64736	0.566854	0.999823
g__Unclassified;s__Siphoviridae sp. ctb1k4	0.943389	0.632109	0.135582	0.902969
g__Fusobacterium;s__Fusobacterium sp. HMSC073F01	0.94331	0.705997	0.181504	0.902969
g__Effusibacillus;s__Effusibacillus lacus	0.942882	1.45701	0.517546	0.995152
g__Microcystis;s__Microcystis sp. M064S2	-0.942622	0.982474	0.337338	0.902969
g__Unclassified;s__Candidatus Saccharibacteria bacterium GW2011_GWC2_48_9	-0.942618	NA	NA	NA
g__Pseudobutyrivibrio;s__Pseudobutyrivibrio sp. MD2005	-0.942162	0.632104	0.136089	0.902969
g__Selenomonas;s__Selenomonas sp. F0473	-0.942151	1.20474	0.434193	0.936323
g__Clostridium;s__Clostridium oryzae	-0.941849	0.646236	0.144996	0.902969
g__Adlercreutzia;s__Adlercreutzia sp. R25	-0.941607	0.835291	0.259624	0.902969
g__Streptococcus;s__Streptococcus sp. NSJ-72	0.941428	0.92352	0.308017	0.902969
g__Ruminococcus;s__Ruminococcus sp. CAG:177	-0.941174	1.22766	0.443296	0.940076
g__Bacteroides;s__Bacteroides sp. AM10-21B	0.941006	1.49252	0.528379	0.999823
g__Collinsella;s__Collinsella urealyticum	-0.939329	0.661535	0.15563	0.902969
g__Candidatus Fervidibacter;s__Candidatus Fervidibacter sacchari	-0.939194	1.1355	0.408168	0.918226
g__Nanosynbacter;s__Candidatus Nanosynbacter sp. HMT-348_TM7c-JB	-0.939071	1.59755	0.556652	0.999823
g__Segatella;s__Segatella buccae	0.938267	0.999294	0.347767	0.902969
g__Bradyrhizobium;s__Bradyrhizobium sp. BRP56	0.937697	0.763265	0.219246	0.902969
g__Alistipes;s__Alistipes ihumii	-0.937461	0.685673	0.171559	0.902969
g__Butyrivibrio;s__Butyrivibrio sp. MB2005	-0.937384	0.517871	0.0702845	0.902969
g__Bifidobacterium;s__Bifidobacterium mongoliense	0.936062	1.22542	0.444943	0.942624
g__Bulleidia;s__Bulleidia sp. zg-1006	-0.936057	1.09287	0.391715	0.908288
g__Akkermansia;s__Akkermansia sp. BIOML-A40	0.935749	0.602061	0.120126	0.902969
g__Lactiplantibacillus;s__Lactiplantibacillus carotarum	-0.935309	1.26631	0.460145	0.952157
g__Neobacillus;s__Neobacillus sp. DY30	0.93485	1.09061	0.391345	0.908145
g__Collinsella;s__Collinsella sp. UBA1693	-0.933442	1.34405	0.48737	0.972446
g__Ruminococcus;s__Ruminococcus sp. AF20-12LB	-0.933144	1.36365	0.493786	0.977337
g__Paenibacillus;s__Paenibacillus piscarius	-0.933011	1.32131	0.48011	0.96635
g__Aquaticitalea;s__Aquaticitalea lipolytica	0.932856	0.571281	0.102486	0.902969
g__Unclassified;s__Bifidobacteriaceae bacterium MCC01954	-0.93174	0.909716	0.305736	0.902969
g__Thermosyntropha;s__Thermosyntropha sp.	0.93093	1.80782	0.606591	0.999823
g__Clostridium;s__Clostridium sp. AF15-41	0.930923	0.841987	0.268888	0.902969
g__Butyricimonas;s__Butyricimonas paravirosa	-0.930731	0.493327	0.0592089	0.902969
g__Blautia;s__Blautia sp. TF10-30	-0.930636	2.0512	0.650042	0.999823
g__Curtobacterium;s__Curtobacterium sp. 8I-2	-0.930441	0.337909	0.00589575	0.902969
g__Unclassified;s__Firmicutes bacterium AM55-24TS	-0.930036	1.71618	0.587873	0.999823
g__Mitsuokella;s__Mitsuokella jalaludinii	-0.92896	0.930824	0.318281	0.902969
g__Alteromonas;s__Alteromonas sp. 1_MG-2023	0.928657	1.32828	0.484462	0.970044
g__Christensenella;s__uncultured Christensenella sp.	-0.928279	0.691357	0.179372	0.902969
g__Caldicellulosiruptor;s__Caldicellulosiruptor morganii	0.927937	1.16437	0.425482	0.930408
g__Portibacter;s__Portibacter marinus	-0.927883	1.22704	0.449531	0.945626
g__Geobacillus;s__Geobacillus stearothermophilus	-0.92758	0.765964	0.225897	0.902969
g__Paenibacillus;s__Paenibacillus tepidiphilus	-0.927394	0.675121	0.169544	0.902969
g__Bergeriella;s__Bergeriella denitrificans	0.92643	1.06135	0.382728	0.903855
g__Parabacteroides;s__Parabacteroides sp. AF48-14	-0.92629	0.864072	0.283717	0.902969
g__Campylobacter;s__Campylobacter sp.	-0.925666	0.389223	0.0173956	0.902969
g__Fusobacterium;s__Fusobacterium sp. PH5-7	0.925502	1.44411	0.5216	0.997367
g__Unclassified;s__Siphoviridae sp. ct4aE30	0.925395	0.967354	0.338756	0.902969
g__Thiomonas;s__Thiomonas delicata	0.924794	0.802818	0.249348	0.902969
g__Abyssisolibacter;s__Abyssisolibacter fermentans	0.924452	0.880593	0.293807	0.902969
g__Clostridium;s__Clostridium sp. AF46-12NS	0.924058	1.34431	0.491841	0.975823
g__Ruminococcus;s__Ruminococcus bovis	0.923962	0.683499	0.176436	0.902969
g__Heyndrickxia;s__Heyndrickxia coagulans	-0.923923	0.773588	0.232347	0.902969
g__Unclassified;s__Siphoviridae sp. ctkyp1	-0.923811	0.592678	0.119066	0.902969
g__Limosilactobacillus;s__Limosilactobacillus oris	-0.923103	1.19722	0.440684	0.938199
g__Collinsella;s__Collinsella sp. AM15-2	-0.922454	0.580011	0.111742	0.902969
g__Unclassified;s__Bacteroidaceae bacterium	0.921937	1.82207	0.612869	0.999823
g__Anaerorhabdus;s__Anaerorhabdus furcosa	0.921201	0.830281	0.267212	0.902969
g__Succiniclasticum;s__uncultured Succiniclasticum sp.	0.920997	0.688506	0.181003	0.902969
g__Bradyrhizobium;s__Bradyrhizobium oligotrophicum	0.920618	0.582203	0.113817	0.902969
g__Clostridium;s__Clostridium sp. HMb25	0.920417	0.521409	0.0775217	0.902969
g__Lactococcus;s__Lactococcus formosensis	-0.920166	1.31887	0.48537	0.970977
g__Gallintestinimicrobium;s__Gallintestinimicrobium sp.	-0.919399	0.684415	0.179163	0.902969
g__Enterobacter;s__Enterobacter sp. OLF	-0.91916	1.29431	0.477607	0.964374
g__Eubacterium;s__Eubacterium sp. 41_20	0.918643	0.539013	0.088324	0.902969
g__Bifidobacterium;s__Bifidobacterium merycicum	-0.918576	0.658587	0.163086	0.902969
g__Brachyspira;s__Brachyspira hyodysenteriae	0.917877	0.38296	0.0165391	0.902969
g__Clostridium;s__Clostridium sp. CAG:762	0.917818	1.41603	0.516881	0.995049
g__Eggerthella;s__Eggerthella sp. HGA1	-0.917377	1.44501	0.525521	0.998413
g__Dysgonomonas;s__Dysgonomonas sp. 25	-0.917243	0.961875	0.340287	0.902969
g__Coprobacillus;s__Coprobacillus sp. AF21-8LB	-0.917135	0.650052	0.158285	0.902969
g__Bacillus;s__Bacillus sp. 491mf	-0.916907	0.962261	0.340657	0.902969
g__Unclassified;s__Myoviridae sp. ctBtV12	0.916607	1.41427	0.516911	0.995049
g__Heliorestis;s__Heliorestis convoluta	0.916506	1.37817	0.50604	0.987219
g__Clostridium;s__Clostridium nigeriense	0.915481	0.740977	0.216643	0.902969
g__Unclassified;s__Deltaproteobacteria bacterium HGW-Deltaproteobacteria-18	0.915338	1.60438	0.568321	0.999823
g__Clostridium;s__Clostridium sp. AF15-6B	-0.914805	1.48425	0.537668	0.999823
g__Sedimentibacter;s__Sedimentibacter sp. zth1	0.914102	0.491745	0.0630419	0.902969
g__Prevotella;s__Prevotella sp. E9-3	0.913932	0.450516	0.0424957	0.902969
g__Caproiciproducens;s__Caproiciproducens sp. MSJ-32	0.913534	0.912118	0.31656	0.902969
g__Clostridium;s__Clostridium senegalense	0.912934	0.934929	0.32883	0.902969
g__Rivihabitans;s__Rivihabitans pingtungensis	-0.912469	0.747295	0.222075	0.902969
g__Unclassified;s__Anaerolineae bacterium	-0.911882	1.29885	0.482637	0.968405
g__Paenibacillus;s__Paenibacillus thermoaerophilus	-0.911722	1.27216	0.473576	0.961782
g__Unclassified;s__Lachnospiraceae bacterium AM25-27	-0.911578	1.49249	0.541349	0.999823
g__Paenibacillus;s__Paenibacillus vini	0.911566	1.14377	0.42546	0.930408
g__Collinsella;s__Collinsella sp. An307	-0.911435	0.843502	0.279903	0.902969
g__Demequina;s__Demequina salsinemoris	0.910629	1.08252	0.40023	0.914429
g__Prevotella;s__Prevotella communis	0.910615	1.25929	0.469607	0.959304
g__Bacteroides;s__Bacteroides sp. AF33-23	0.910356	1.49187	0.541723	0.999823
g__Marispirochaeta;s__Marispirochaeta aestuarii	-0.910341	0.638517	0.153952	0.902969
g__Thiomonas;s__Thiomonas arsenitoxydans	0.909803	0.990998	0.358583	0.902969
g__Streptococcus;s__Streptococcus sp. SG1	-0.909791	0.950762	0.338614	0.902969
g__Unclassified;s__Siphoviridae sp. ctxBC2	-0.909512	1.35006	0.500514	0.982944
g__Streptococcus;s__Streptococcus pluranimalium	-0.909069	0.567811	0.109375	0.902969
g__Desulfovibrio;s__Desulfovibrio sp. An276	0.908465	0.922982	0.324981	0.902969
g__Caryophanon;s__Caryophanon latum	-0.908174	1.47344	0.537656	0.999823
g__Unclassified;s__Siphoviridae sp. ctP6113	0.907864	0.713062	0.20295	0.902969
g__Unclassified;s__Lachnospiraceae bacterium 2_1_46FAA	0.90687	1.87274	0.62821	0.999823
g__Clostridium;s__Clostridium sp. TF08-15	0.906605	1.78441	0.611404	0.999823
g__Collinsella;s__Collinsella sp. AF14-35	-0.906577	0.621755	0.144815	0.902969
g__Sphaerochaeta;s__Sphaerochaeta pleomorpha	-0.906532	1.18732	0.445157	0.94289
g__Unclassified;s__Lachnospiraceae bacterium NE2001	0.905579	0.730917	0.21536	0.902969
g__Prevotella;s__Prevotella sp. CAG:1058	0.904415	1.83727	0.622535	0.999823
g__Coraliomargarita;s__Coraliomargarita sp. TMED73	0.904048	1.15684	0.434521	0.936323
g__Unclassified;s__Firmicutes bacterium CAG:424	0.903946	1.87363	0.629481	0.999823
g__Bacteroides;s__Bacteroides cutis	-0.903745	0.42627	0.0339957	0.902969
g__Collinsella;s__Collinsella sp. An271	-0.902972	0.880616	0.305181	0.902969
g__Bacteroides;s__Bacteroides sp. AF18-33	0.902914	1.05055	0.390081	0.90794
g__Garciella;s__Garciella nitratireducens	-0.902303	0.900203	0.316183	0.902969
g__Gabonibacter;s__Gabonibacter chumensis	-0.902148	1.13163	0.425327	0.930408
g__Streptococcus;s__Streptococcus caecimuris	-0.901672	1.52586	0.554568	0.999823
g__Streptococcus;s__Streptococcus sp. 3.1	0.900985	0.591763	0.127873	0.902969
g__Faecalibacterium;s__Faecalibacterium sp. Marseille-Q3530	-0.900971	1.69622	0.595304	0.999823
g__Unclassified;s__Erysipelotrichaceae bacterium AF19-24AC	0.900716	0.920101	0.327614	0.902969
g__Flavobacterium;s__Flavobacterium ranwuense	-0.900623	1.16838	0.440809	0.938199
g__Collinsella;s__Collinsella provencensis	-0.900187	0.954903	0.345834	0.902969
g__Unclassified;s__Thermoproteota archaeon	-0.899978	0.474006	0.0576088	0.902969
g__Prevotella;s__Prevotella bivia	0.899365	0.871648	0.302167	0.902969
g__Bacteroides;s__Bacteroides sp. 519	0.898953	0.515845	0.0813892	0.902969
g__Succinispira;s__Succinispira mobilis	0.898877	1.15086	0.434776	0.936323
g__Unclassified;s__Spirochaetae bacterium HGW-Spirochaetae-2	-0.898087	0.89826	0.317404	0.902969
g__Paenibacillus;s__Paenibacillus qinlingensis	-0.897653	0.854087	0.293254	0.902969
g__Peptoniphilus;s__Peptoniphilus sp.	0.897052	0.82582	0.277366	0.902969
g__Gibbsiella;s__Gibbsiella quercinecans	0.896634	0.413505	0.0301304	0.902969
g__Clostridium;s__Clostridium sp. CAG:508	0.896161	1.08182	0.407455	0.918226
g__Candidatus Minimicrobia;s__Candidatus Minimicrobia naudis	-0.894306	1.73147	0.605505	0.999823
g__Eubacterium;s__Eubacterium sp. AF22-8LB	-0.89363	1.67178	0.592969	0.999823
g__Coprococcus;s__Coprococcus sp. TM115-187	-0.893331	1.0129	0.377801	0.903334
g__Microcystis;s__Microcystis sp. LE17-20D	-0.893324	0.690849	0.195983	0.902969
g__Clostridium;s__Clostridium sp. BSD2780061688st1 E8	-0.892955	1.2583	0.47792	0.964374
g__Ruminococcus;s__Ruminococcus sp. OF02-6	-0.89275	1.48529	0.547798	0.999823
g__Unclassified;s__CrAss-like virus sp. ctt4r3	-0.892674	0.435381	0.0403325	0.902969
g__Paenibacillus;s__Paenibacillus sp. Soil766	-0.892555	1.55998	0.567214	0.999823
g__Shuttleworthia;s__Shuttleworthia satelles	0.892395	0.437084	0.0411812	0.902969
g__Unclassified;s__Phage sp. ctez94	-0.892119	1.66891	0.592959	0.999823
g__Paenibacillus;s__Paenibacillus massiliensis	0.891541	0.78277	0.254722	0.902969
g__Unclassified;s__Chloroflexi bacterium RBG_16_50_9	0.891016	0.91802	0.331755	0.902969
g__Haemophilus;s__Haemophilus pittmaniae	0.890688	0.701289	0.204059	0.902969
g__Desulfurivibrio;s__Desulfurivibrio alkaliphilus	-0.890532	1.30379	0.494586	0.977825
g__Unclassified;s__Xanthomonadaceae bacterium	-0.890456	0.592574	0.132919	0.902969
g__Collinsella;s__Collinsella sp. TF06-6AC	-0.890098	0.474933	0.060909	0.902969
g__Clostridium;s__Clostridium sporogenes	-0.889903	0.66349	0.179841	0.902969
g__Enterococcus;s__Enterococcus sp. JM4C	-0.889515	0.95694	0.352609	0.902969
g__Pandoraea;s__Pandoraea apista	-0.888986	0.529979	0.093465	0.902969
g__Ilyobacter;s__uncultured Ilyobacter sp.	0.888798	0.440161	0.0434604	0.902969
g__Enterobacter;s__Enterobacter roggenkampii	-0.888749	2.30108	0.699326	0.999823
g__Berryella;s__Berryella wangjianweii	-0.888646	0.349149	0.0109223	0.902969
g__Paludibacter;s__Paludibacter propionicigenes	-0.888126	1.29008	0.491185	0.975787
g__Nocardioides;s__Nocardioides sp. Soil777	-0.887452	1.55382	0.567902	0.999823
g__Holdemania;s__uncultured Holdemania sp.	0.887188	0.582406	0.127679	0.902969
g__Clostridium;s__Clostridium sp. Cult2	0.886911	0.728017	0.223127	0.902969
g__Acinetobacter;s__Acinetobacter sp. RIT592	-0.886826	0.460742	0.0542575	0.902969
g__Clostridium;s__Clostridium sp. BL-8	-0.88677	1.17864	0.451832	0.947428
g__Sutcliffiella;s__Sutcliffiella horikoshii	-0.885987	0.956	0.354049	0.902969
g__Enorma;s__uncultured Enorma sp.	-0.88587	0.709844	0.212039	0.902969
g__Neisseria;s__Neisseria sicca	0.885751	0.562458	0.115306	0.902969
g__Alkalibacter;s__Alkalibacter mobilis	-0.88574	0.871594	0.30952	0.902969
g__Pseudoscardovia;s__Pseudoscardovia suis	-0.885108	1.15186	0.442241	0.939384
g__Megasphaera;s__Megasphaera hominis	-0.885084	0.898101	0.324375	0.902969
g__Unclassified;s__Siphoviridae sp. ctkmP13	-0.884933	0.956739	0.354993	0.902969
g__Telmatospirillum;s__Telmatospirillum sp.	-0.884507	1.31009	0.49958	0.982404
g__Leyella;s__Leyella lascolaii	0.88445	1.07953	0.412618	0.920315
g__Eubacterium;s__Eubacterium sp. AM46-8	-0.882858	1.64595	0.591694	0.999823
g__Megasphaera;s__Megasphaera massiliensis	-0.881333	0.401057	0.027983	0.902969
g__Tissierella;s__Tissierella pigra	0.880961	0.882776	0.318307	0.902969
g__Veillonella;s__Veillonella sp. HPA0037	-0.880471	0.68198	0.196686	0.902969
g__Muricomes;s__Muricomes sp. OA1	0.880434	0.826649	0.286847	0.902969
g__Butyrivibrio;s__Butyrivibrio sp. AE3009	0.879993	0.864385	0.308651	0.902969
g__Adlercreutzia;s__Adlercreutzia caecimuris	-0.879874	0.687534	0.200632	0.902969
g__Fournierella;s__uncultured Fournierella sp.	0.879799	0.742128	0.235817	0.902969
g__Atopobium;s__Atopobium deltae	-0.879216	0.866539	0.310283	0.902969
g__Unclassified;s__Veillonellaceae bacterium	-0.87834	1.12535	0.435094	0.936323
g__Tumebacillus;s__Tumebacillus algifaecis	-0.878123	0.42036	0.0367095	0.902969
g__Bacteroides;s__Bacteroides sp. 3_1_13	0.877814	1.40244	0.531367	0.999823
g__Bacteroides;s__Bacteroides zhangwenhongii	0.877778	0.687779	0.201867	0.902969
g__Clostridium;s__Clostridium sp. DSM 8431	0.876953	0.796688	0.271006	0.902969
g__Subdoligranulum;s__Subdoligranulum sp. APC924_74	-0.875196	1.82533	0.631603	0.999823
g__Clostridium;s__Clostridium sp. LY3-2	-0.874962	0.319528	0.00617588	0.902969
g__Exercitatus;s__Exercitatus varius	0.874914	1.28056	0.494465	0.977825
g__Pyramidobacter;s__Pyramidobacter piscolens	0.874338	0.650233	0.178737	0.902969
g__Coprococcus;s__Coprococcus sp. AM27-12LB	0.87432	0.814779	0.283237	0.902969
g__Unclassified;s__Clostridiales bacterium GWD2_32_19	-0.873082	0.843992	0.300918	0.902969
g__Bacillus;s__Bacillus testis	-0.871604	1.18903	0.463535	0.955838
g__Collinsella;s__Collinsella sp. CAG:166	-0.871594	0.529606	0.0998169	0.902969
g__Roseburia;s__Roseburia sp. CAG:471	-0.871469	2.17616	0.688816	0.999823
g__Anaerostipes;s__Anaerostipes hadrus	-0.870857	1.30562	0.504769	0.986445
g__Paenibacillus;s__Paenibacillus lactis	-0.870615	0.41341	0.03521	0.902969
g__Emergencia;s__Emergencia timonensis	-0.870207	1.85885	0.639683	0.999823
g__Ruminococcus;s__Ruminococcus sp. AM26-12LB	-0.870079	1.21402	0.473563	0.961782
g__Desulfosporosinus;s__Desulfosporosinus sp. Tol-M	-0.86984	0.956171	0.362975	0.902969
g__Unclassified;s__Firmicutes bacterium CAG:308	-0.869742	0.371867	0.019343	0.902969
g__Saliterribacillus;s__Saliterribacillus persicus	-0.869599	1.03621	0.40135	0.914429
g__Saccharomyces;s__Saccharomyces cerevisiae	-0.869551	1.08448	0.42266	0.927039
g__Acutalibacter;s__Acutalibacter muris	0.86755	0.545801	0.111948	0.902969
g__Sporosarcina;s__Sporosarcina globispora	0.867348	1.114	0.436221	0.93726
g__Pseudoflavonifractor;s__Pseudoflavonifractor sp. SW1122	0.867198	1.41128	0.538901	0.999823
g__Unclassified;s__Alphaproteobacteria bacterium CG_4_10_14_0_2_um_filter_63_37	0.867154	1.54287	0.574089	0.999823
g__Parabacteroides;s__Parabacteroides sp. PF5-6	0.866976	1.41708	0.540668	0.999823
g__Ruminococcus;s__Ruminococcus sp. TF11-2AC	-0.866738	1.26179	0.492138	0.975823
g__Streptococcus;s__Streptococcus sp. NLAE-zl-C503	-0.866602	0.6032	0.15081	0.902969
g__Sporomusa;s__Sporomusa sp.	0.866548	0.931809	0.35239	0.902969
g__Bacteroides;s__Bacteroides sp. AF25-18	0.866303	0.952711	0.36319	0.902969
g__Weissella;s__Weissella soli	0.865832	1.37156	0.52786	0.99967
g__Unclassified;s__Siphoviridae sp. ctFIm6	-0.865821	1.14008	0.44759	0.944269
g__Salinicoccus;s__Salinicoccus carnicancri	0.865748	0.587069	0.140294	0.902969
g__Brooklawnia;s__Brooklawnia cerclae	-0.865269	0.220759	8.87271e-05	0.902969
g__Bifidobacterium;s__Bifidobacterium lemurum	0.8651	1.16881	0.459208	0.951399
g__Unclassified;s__Clostridiales Family XIII bacterium	0.864905	0.664723	0.193206	0.902969
g__Ruminococcus;s__Ruminococcus champanellensis	-0.864811	1.96257	0.659464	0.999823
g__Gracilibacillus;s__Gracilibacillus thailandensis	0.864778	1.22486	0.480173	0.96635
g__Olsenella;s__Olsenella intestinalis	-0.864719	0.442945	0.0509138	0.902969
g__Actinomyces;s__Actinomyces howellii	-0.864295	0.636318	0.174376	0.902969
g__Heliobacterium;s__Heliobacterium chlorum	-0.863937	0.496689	0.0819659	0.902969
g__Unclassified;s__uncultured bacterium Contigcl_1738	-0.863598	1.16943	0.460223	0.952157
g__Haemophilus;s__Haemophilus sp. HMSC061E01	0.86346	0.720917	0.231024	0.902969
g__Bacteroides;s__Bacteroides sp. ET489	0.861897	1.50186	0.566045	0.999823
g__Paenibacillus;s__Paenibacillus sp. sptzw28	-0.861496	1.06555	0.418802	0.924244
g__Streptococcus;s__Streptococcus sp. HMSC034A12	-0.861481	0.704779	0.221578	0.902969
g__Clostridium;s__Clostridium sp. C105KSO15	-0.86131	0.429367	0.0448564	0.902969
g__Unclassified;s__Bifidobacteriaceae bacterium MCC02030	-0.861284	0.56769	0.129223	0.902969
g__Massilimicrobiota;s__Massilimicrobiota sp. SW1139	0.860976	1.14217	0.450967	0.946869
g__Petrotoga;s__Petrotoga sp. 9PWA.NaAc.5.4	0.860262	1.1551	0.456422	0.950022
g__Mitsuokella;s__Mitsuokella sp.	0.860232	1.10597	0.436684	0.937495
g__Clostridium;s__Clostridium liquoris	-0.860025	0.545569	0.114938	0.902969
g__Actinomyces;s__Actinomyces graevenitzii	-0.859915	1.81287	0.635258	0.999823
g__Cuneatibacter;s__Cuneatibacter sp. NSJ-177	0.859765	1.4282	0.547179	0.999823
g__Anaerostipes;s__Anaerostipes sp. Marseille-Q3525	-0.859016	1.61653	0.595145	0.999823
g__Salmonella;s__Salmonella sp. 14	-0.858974	0.477521	0.0720474	0.902969
g__Dysgonomonas;s__Dysgonomonas sp. 521	0.858481	0.795179	0.280317	0.902969
g__Sphingobium;s__Sphingobium sp. WTD-1	-0.857922	1.04656	0.412355	0.920225
g__Butyrivibrio;s__Butyrivibrio sp. INlla18	-0.85729	0.883546	0.331905	0.902969
g__Gabonibacter;s__Gabonibacter massiliensis	0.857175	1.51164	0.57068	0.999823
g__Mediterranea;s__Mediterranea sp. An20	0.856573	1.03481	0.407807	0.918226
g__Mogibacterium;s__Mogibacterium neglectum	-0.856013	0.474137	0.0710103	0.902969
g__Unclassified;s__Firmicutes bacterium CAG:83	0.855709	2.15213	0.690918	0.999823
g__Schwartzia;s__Schwartzia succinivorans	-0.855527	1.38757	0.537522	0.999823
g__Sutterella;s__Sutterella sp. AF15-45LB	0.854339	1.28098	0.50481	0.986445
g__Bradyrhizobium;s__Bradyrhizobium pachyrhizi	0.853929	1.17859	0.468736	0.958859
g__Psychrobacter;s__Psychrobacter lutiphocae	-0.852677	0.521642	0.102132	0.902969
g__Streptococcus;s__Streptococcus sp. DD13	-0.852472	0.502903	0.0900563	0.902969
g__Clostridium;s__Clostridium sp. 001	0.852379	1.69975	0.616039	0.999823
g__Spirosoma;s__Spirosoma aerolatum	-0.852049	0.547999	0.119985	0.902969
g__Desulfuromonas;s__Desulfuromonas soudanensis	-0.851263	1.09119	0.435318	0.936459
g__Stoquefichus;s__Candidatus Stoquefichus sp. SB1	0.850984	1.76163	0.629048	0.999823
g__Desulfitobacterium;s__Desulfitobacterium sp. LBE	0.8507	0.9908	0.390561	0.908145
g__Ruminococcus;s__Ruminococcus sp. AM23-1LB	-0.850613	1.34588	0.527378	0.999585
g__Capnocytophaga;s__Capnocytophaga sp. oral taxon 338	-0.850323	1.07586	0.429313	0.933016
g__Unclassified;s__Firmicutes bacterium TM09-10	-0.84956	1.97821	0.66759	0.999823
g__Gordonibacter;s__Gordonibacter sp. An232A	-0.849551	1.08354	0.43301	0.935673
g__Megasphaera;s__Megasphaera stantonii	-0.849158	1.14691	0.459066	0.951399
g__Candidatus Denitrolinea;s__Candidatus Denitrolinea symbiosum	-0.848558	1.15719	0.463379	0.955703
g__Streptococcus;s__Streptococcus sp. HMSC10A01	0.847749	0.52745	0.107997	0.902969
g__Paratractidigestivibacter;s__Paratractidigestivibacter sp.	-0.847705	0.634919	0.181831	0.902969
g__Acidiphilium;s__Acidiphilium sp. CAG:727	0.847571	1.44941	0.558701	0.999823
g__Streptomyces;s__Streptomyces sp. A012304	-0.847082	0.530183	0.110106	0.902969
g__Alkaliphilus;s__Alkaliphilus metalliredigens	-0.846789	0.76525	0.268488	0.902969
g__Blautia;s__Blautia sp. NSJ-157	-0.84656	0.651724	0.193959	0.902969
g__Blautia;s__Blautia sp. MSK18_10	-0.845992	1.46224	0.562886	0.999823
g__Gordonibacter;s__Gordonibacter sp. RACS_AR49	-0.845426	1.79386	0.637435	0.999823
g__Leuconostoc;s__Leuconostoc carnosum	-0.845402	0.795158	0.287697	0.902969
g__Unclassified;s__Porphyromonadaceae bacterium	0.845091	0.595614	0.155941	0.902969
g__Microbacterium;s__uncultured Microbacterium sp.	0.844855	0.407478	0.0381374	0.902969
g__Streptococcus;s__Streptococcus sp. BJSWXB5TM5	0.844763	0.740442	0.253916	0.902969
g__Clostridium;s__Clostridium sp. 1001271B_150615_H5	0.844564	0.622557	0.174907	0.902969
g__Butyrivibrio;s__Butyrivibrio sp. AE2015	-0.84444	0.952534	0.375338	0.902969
g__Haemophilus;s__Haemophilus sp. HMSC073C03	0.843926	1.29221	0.5137	0.993377
g__Clostridium;s__Clostridium disporicum	-0.84379	0.65527	0.197851	0.902969
g__Serratia;s__Serratia sp. CC22-02	0.843358	1.56544	0.590069	0.999823
g__Geomesophilobacter;s__Geomesophilobacter sediminis	-0.843272	1.14421	0.461127	0.953283
g__Unclassified;s__Parcubacteria group bacterium Gr01-1014_38	-0.842594	0.980971	0.390374	0.908145
g__Helcococcus;s__Helcococcus kunzii	-0.84217	1.07505	0.433404	0.93595
g__Unclassified;s__Proteobacteria bacterium CAG:495	0.841373	0.527888	0.11097	0.902969
g__Schaalia;s__Schaalia sp. lx-100	-0.841151	0.855705	0.325611	0.902969
g__Unclassified;s__Firmicutes bacterium ADurb.Bin080	0.840989	1.20356	0.484707	0.970238
g__Citrobacter;s__Citrobacter sp. RHBSTW-00271	0.840778	1.38591	0.544075	0.999823
g__Schaedlerella;s__Schaedlerella arabinosiphila	0.840636	1.00077	0.400915	0.914429
g__Unclassified;s__Firmicutes bacterium CAG:102	0.840608	0.655986	0.200038	0.902969
g__Unclassified;s__bacterium 1XD42-54	-0.840536	1.47886	0.569785	0.999823
g__Escherichia;s__Escherichia albertii	-0.840393	2.19103	0.701304	0.999823
g__Streptococcus;s__Streptococcus sp. HMSC063B03	0.84033	0.493749	0.088767	0.902969
g__Myroides;s__Myroides odoratimimus	0.840165	0.957643	0.380309	0.903855
g__Unclassified;s__Myoviridae sp. ctNDZ29	-0.840042	1.05146	0.424332	0.92885
g__Prevotella;s__Prevotella sp. CAG:1320	0.839974	1.63787	0.608059	0.999823
g__Rothia;s__Rothia sp. HMSC069C01	0.83917	1.3473	0.533381	0.999823
g__Clostridium;s__Clostridium sp. KNHs205	-0.838745	0.519788	0.106608	0.902969
g__Enorma;s__Enorma burkinafasonensis	-0.838456	0.677944	0.216175	0.902969
g__Hyphomonas;s__Hyphomonas sp. UBA4494	-0.838311	0.436819	0.0549682	0.902969
g__Parabacteroides;s__Parabacteroides sp. TM07-1AC	-0.838274	0.897959	0.350545	0.902969
g__Robertmurraya;s__Robertmurraya kyonggiensis	-0.838043	1.45946	0.565822	0.999823
g__Sphingorhabdus;s__uncultured Sphingorhabdus sp.	-0.837939	0.899311	0.351462	0.902969
g__Anaeromicrobium;s__Anaeromicrobium sediminis	-0.837725	0.76747	0.275035	0.902969
g__Caloramator;s__Caloramator fervidus	0.837308	0.915177	0.360237	0.902969
g__Unclassified;s__uncultured Rubrobacteraceae bacterium	0.837241	1.44793	0.563106	0.999823
g__Enterococcus;s__Enterococcus plantarum	0.837199	1.10579	0.448986	0.94552
g__Clostridium;s__Clostridium gallinarum	-0.836974	0.828171	0.312194	0.902969
g__Anaerobiospirillum;s__Anaerobiospirillum succiniciproducens	0.836775	0.393175	0.0333161	0.902969
g__Adlercreutzia;s__Adlercreutzia sp. ZJ304	0.836745	1.01815	0.411176	0.919808
g__Unclassified;s__Myoviridae sp. ctZDd15	0.835982	1.54298	0.587957	0.999823
g__Enterococcus;s__Enterococcus lactis	-0.835962	0.83908	0.319112	0.902969
g__Unclassified;s__Firmicutes bacterium CAG:145	-0.835388	NA	NA	NA
g__Escherichia;s__Escherichia marmotae	-0.834732	0.784721	0.287451	0.902969
g__Unclassified;s__Thermoanaerobacteraceae bacterium SP2	0.833925	1.06727	0.434591	0.936323
g__Paucilactobacillus;s__Paucilactobacillus nenjiangensis	-0.83387	0.933087	0.3715	0.902969
g__Unclassified;s__Planctomycetes bacterium RBG_16_43_13	0.833755	0.458113	0.0687627	0.902969
g__Sporomusa;s__Sporomusa sp. KB1	0.833688	0.854008	0.328963	0.902969
g__Unclassified;s__Siphoviridae sp. ctv838	0.833521	0.720995	0.247652	0.902969
g__Leuconostoc;s__Leuconostoc gasicomitatum	-0.832773	0.762238	0.274598	0.902969
g__Atopobium;s__Atopobium sp. oral taxon 810	0.831943	1.18864	0.483981	0.969517
g__Blautia;s__Blautia sp. AF17-9LB	-0.83178	1.65558	0.615378	0.999823
g__Paenibacillus;s__Paenibacillus aceti	0.831474	1.66723	0.617979	0.999823
g__Ruminococcus;s__Ruminococcus sp. AM50-15BH	-0.830886	1.23494	0.501067	0.983301
g__Salmonella;s__Salmonella sp. gx-f5	0.830657	1.21854	0.495442	0.978278
g__Murdochiella;s__Murdochiella massiliensis	0.830436	1.58996	0.60146	0.999823
g__Rhodococcus;s__Rhodococcus qingshengii	-0.829372	0.526488	0.115189	0.902969
g__Eubacterium;s__Eubacterium sp. CAG:274	0.829342	3.74103	0.824557	0.999823
g__Georgenia;s__Georgenia sp. SUBG003	-0.829341	0.711891	0.244026	0.902969
g__Enterocloster;s__Enterocloster sp. 210928-DFI.2.20	0.829059	0.756388	0.273046	0.902969
g__Bacillus;s__Bacillus paranthracis	-0.829011	0.468397	0.0767456	0.902969
g__Sphingobium;s__Sphingobium subterraneum	-0.82877	0.71764	0.248149	0.902969
g__Rhodococcus;s__Rhodococcus ruber	0.827594	0.666523	0.214362	0.902969
g__Kosakonia;s__Kosakonia sp. MH5	0.827258	1.08548	0.445991	0.943445
g__Acetivibrio;s__Acetivibrio saccincola	-0.826722	1.06515	0.437659	0.93753
g__Unclassified;s__Candidatus Melainabacteria bacterium	0.826308	0.442074	0.0616003	0.902969
g__Unclassified;s__uncultured bacterium Contig87	0.826269	0.842207	0.326555	0.902969
g__Gallintestinimicrobium;s__Gallintestinimicrobium propionicum	-0.826143	1.853	0.655713	0.999823
g__Candidatus Arthromitus;s__Candidatus Arthromitus sp. SFB-turkey	0.826073	0.383135	0.0310768	0.902969
g__Streptococcus;s__Streptococcus sp. UMB0029	-0.824942	0.525749	0.116629	0.902969
g__Desulfovibrio;s__uncultured Desulfovibrio sp.	0.824808	1.77962	0.643025	0.999823
g__Hominilimicola;s__Hominilimicola fabiformis	-0.824575	1.82275	0.650995	0.999823
g__Paenibacillus;s__Paenibacillus hamazuiensis	-0.82434	0.885728	0.352013	0.902969
g__Alistipes;s__Alistipes sp. HGB5	-0.823923	0.622519	0.185659	0.902969
g__Unclassified;s__Firmicutes bacterium HGW-Firmicutes-4	0.823177	0.693395	0.235161	0.902969
g__Aggregatibacter;s__Aggregatibacter kilianii	0.822615	0.913155	0.367668	0.902969
g__Paenibacillus;s__Paenibacillus baekrokdamisoli	0.822465	1.02563	0.422605	0.927039
g__Streptococcus;s__Streptococcus massiliensis	0.822363	0.528429	0.11965	0.902969
g__Weissella;s__uncultured Weissella sp.	-0.821919	0.977952	0.400657	0.914429
g__Unclassified;s__Siphoviridae sp. ct1Zj2	0.820685	1.37986	0.552005	0.999823
g__Cellulosilyticum;s__Cellulosilyticum lentocellum	0.820571	0.573683	0.152615	0.902969
g__Coprococcus;s__Coprococcus hominis (ex Arizal et al. 2022)	-0.820344	1.0922	0.452598	0.948069
g__Sporosarcina;s__Sporosarcina ureilytica	0.820082	1.47556	0.578363	0.999823
g__Granulimonas;s__Granulimonas faecalis	-0.819838	1.22398	0.502978	0.985044
g__Unclassified;s__Podoviridae sp. ctval4	-0.819558	0.408984	0.0450821	0.902969
g__Unclassified;s__Siphoviridae sp. ctf8W5	-0.819527	1.19685	0.493511	0.977038
g__Crenothrix;s__Crenothrix polyspora	-0.819482	1.30853	0.531142	0.999823
g__Collinsella;s__Collinsella sp. AF16-8	-0.819106	0.478233	0.0867538	0.902969
g__Methanimicrococcus;s__Methanimicrococcus sp. Hf6	0.818973	1.15817	0.479488	0.96635
g__Tyzzerella;s__[Clostridium] colinum	0.818879	1.05305	0.436791	0.93753
g__Eubacterium;s__Eubacterium sp. LMAG:50	0.818154	0.64085	0.201719	0.902969
g__Bacillus;s__Bacillus sp. AFS031507	0.817784	1.12479	0.467193	0.95833
g__Unclassified;s__bacterium ADurb.Bin478	-0.817672	0.567682	0.149763	0.902969
g__Unclassified;s__Elusimicrobia bacterium CG1_02_56_21	-0.817667	1.289	0.525857	0.998413
g__Bacteroides;s__Bacteroides sp. CACC 737	0.816983	0.654541	0.211967	0.902969
g__Neobittarella;s__Neobittarella massiliensis	0.816747	1.17199	0.485871	0.97119
g__Clostridium;s__Clostridium sp. AF12-41	-0.816621	1.38129	0.554386	0.999823
g__Ruminococcus;s__Ruminococcus sp. AF32-2AC	-0.816518	1.57332	0.603777	0.999823
g__Clostridium;s__Clostridium sp. CAG:575	0.816189	1.19789	0.495646	0.978278
g__Caldicellulosiruptor;s__Caldicellulosiruptor danielii	0.815726	0.779339	0.295242	0.902969
g__Streptococcus;s__Streptococcus sp. SP8	-0.815018	0.638465	0.201769	0.902969
g__Clostridium;s__Clostridium sp. SS2_1	-0.814832	1.39765	0.559894	0.999823
g__Unclassified;s__Peptococcaceae bacterium BRH_c4b	-0.814605	1.42246	0.566866	0.999823
g__Odoribacter;s__Odoribacter sp. AF15-53	-0.813242	0.846099	0.336468	0.902969
g__Aliarcobacter;s__Aliarcobacter butzleri	0.812894	0.852134	0.340108	0.902969
g__Butyrivibrio;s__Butyrivibrio sp. NC2007	0.812783	0.681521	0.233025	0.902969
g__Unclassified;s__Bifidobacteriales bacterium 56_10	-0.812588	0.442064	0.0660374	0.902969
g__Niabella;s__Niabella ginsenosidivorans	-0.812538	0.464365	0.0801558	0.902969
g__Desulfovibrio;s__Desulfovibrio sp. ZJ200	-0.812139	0.827848	0.326581	0.902969
g__Clostridium;s__Clostridium intestinale	0.812063	0.595184	0.172445	0.902969
g__Massiliimalia;s__Massiliimalia timonensis	-0.811371	1.94331	0.676298	0.999823
g__Streptococcus;s__Streptococcus sp. HF-2466	0.811229	0.735364	0.269955	0.902969
g__Blautia;s__Blautia sp. MSK.20.85	-0.811184	1.46851	0.580684	0.999823
g__Coprobacillus;s__Coprobacillus sp. OF02-11LB	-0.811016	0.979346	0.407602	0.918226
g__Bovifimicola;s__Bovifimicola ammoniilytica	-0.8109	0.520071	0.118947	0.902969
g__Cytobacillus;s__Cytobacillus oceanisediminis	0.810741	1.02645	0.429614	0.933117
g__Carnobacterium;s__Carnobacterium inhibens	0.810638	0.914829	0.375559	0.902969
g__Cohnella;s__Cohnella endophytica	0.810585	0.930178	0.383519	0.903855
g__Bacteroides;s__Bacteroides sp. NSJ-48	0.810581	1.87364	0.665289	0.999823
g__Dialister;s__Dialister massiliensis	0.810376	1.20699	0.501964	0.98395
g__Plebeiobacterium;s__Plebeiobacterium sediminum	0.81023	0.395673	0.0405868	0.902969
g__Lactimicrobium;s__Lactimicrobium massiliense	0.810218	1.37648	0.556119	0.999823
g__Clostridium;s__Clostridium diolis	-0.809598	0.641326	0.206811	0.902969
g__Unclassified;s__Chloroflexi bacterium HGW-Chloroflexi-6	-0.808646	1.45895	0.579398	0.999823
g__Faecalibacterium;s__Faecalibacterium sp. BCRC 81397	0.808366	0.622703	0.194233	0.902969
g__Amphibacillus;s__Amphibacillus cookii	-0.807803	0.891589	0.364922	0.902969
g__Unclassified;s__Podoviridae sp. ctC2p8	0.807641	0.542361	0.136456	0.902969
g__Subdoligranulum;s__Subdoligranulum sp. AM16-9	0.807603	1.61088	0.61613	0.999823
g__Dorea;s__Dorea sp. CAG:317	0.807519	2.00134	0.686588	0.999823
g__Pauljensenia;s__Pauljensenia sp. OF14-1SRA	-0.807441	0.314075	0.0101447	0.902969
g__Gallibacterium;s__Gallibacterium salpingitidis	0.806956	0.606328	0.183225	0.902969
g__Gemmiger;s__Gemmiger sp.	-0.806798	1.654	0.625702	0.999823
g__Dorea;s__Dorea sp. 210702-DFI.3.125	-0.806748	0.484755	0.0960647	0.902969
g__Citrobacter;s__Citrobacter sp. wls613	-0.806503	0.750396	0.282477	0.902969
g__Salegentibacter;s__Salegentibacter sp. F188	-0.806437	1.15072	0.48342	0.96876
g__Cedecea;s__Cedecea neteri	0.804843	1.86069	0.665341	0.999823
g__Hugonella;s__Hugonella massiliensis	-0.804696	0.794495	0.311137	0.902969
g__Prevotella;s__Prevotella sp. E15-22	0.804691	1.13939	0.480035	0.96635
g__Eisenbergiella;s__Eisenbergiella sp. OF01-20	0.80462	1.40298	0.566301	0.999823
g__Bifidobacterium;s__Bifidobacterium sp. N4G05	-0.804465	0.951918	0.398056	0.912522
g__Clostridium;s__Clostridium sp. AT4	-0.804031	1.56834	0.608186	0.999823
g__Lentibacillus;s__Lentibacillus sp.	-0.803948	1.31735	0.54168	0.999823
g__Desulforamulus;s__Desulforamulus aquiferis	0.803066	0.925294	0.385447	0.904564
g__Unclassified;s__Siphoviridae sp. ctoiW10	0.802725	1.65929	0.628544	0.999823
g__Blautia;s__Blautia sp. KLE 1732	-0.80216	1.09751	0.464846	0.956866
g__Sphaerochaeta;s__Sphaerochaeta associata	0.801598	0.626556	0.200767	0.902969
g__Heliobacterium;s__Heliobacterium mobile	0.801582	1.57612	0.611048	0.999823
g__Bacteroides;s__Bacteroides timonensis	0.801518	0.697719	0.250651	0.902969
g__Acetobacter;s__Acetobacter sp. CAG:977	0.80147	1.29885	0.537194	0.999823
g__Unclassified;s__Siphoviridae sp. ctDo63	-0.80115	1.41931	0.572439	0.999823
g__Paenibacillus;s__Paenibacillus turicensis	0.800659	0.986015	0.416783	0.922776
g__Oliverpabstia;s__Oliverpabstia sp.	-0.800253	0.560118	0.153084	0.902969
g__Porcincola;s__Porcincola intestinalis	-0.80019	NA	NA	NA
g__Clostridium;s__Clostridium sp. CAG:167	0.800179	0.477806	0.093994	0.902969
g__Methanosphaera;s__uncultured Methanosphaera sp.	0.800008	1.05745	0.449324	0.945626
g__Coprobacillus;s__Coprobacillus sp. AF17-17AC	-0.799273	1.4999	0.594115	0.999823
g__Proteiniphilum;s__Proteiniphilum saccharofermentans	0.799236	0.432084	0.0643535	0.902969
g__Aedoeadaptatus;s__Aedoeadaptatus acetigenes	-0.799179	1.90911	0.675499	0.999823
g__Anaerosalibacter;s__Anaerosalibacter sp. Marseille-P3206	0.799068	0.965083	0.407683	0.918226
g__Angustibacter;s__Angustibacter aerolatus	-0.798762	0.791304	0.312771	0.902969
g__Peptoniphilus;s__Peptoniphilus faecalis	-0.797904	0.640138	0.212597	0.902969
g__Acidaminococcus;s__Acidaminococcus hominis	0.797812	0.417632	0.0560914	0.902969
g__Metabacillus;s__Metabacillus malikii	-0.79776	1.21871	0.512729	0.992849
g__Unclassified;s__Firmicutes bacterium CAG:114	-0.797603	0.756261	0.291578	0.902969
g__Unclassified;s__Microvirus sp.	0.797596	0.482784	0.098519	0.902969
g__Paenibacillus;s__Paenibacillus sp. DMB5	0.797554	1.46205	0.585408	0.999823
g__Unclassified;s__Firmicutes bacterium ADurb.Bin456	-0.797285	1.13402	0.482016	0.967959
g__Fusobacterium;s__Fusobacterium massiliense	-0.79713	1.37058	0.560835	0.999823
g__Adlercreutzia;s__Adlercreutzia sp. DFI.6.23	-0.797021	0.695158	0.251575	0.902969
g__Staphylospora;s__Staphylospora marina	-0.796505	1.02292	0.436182	0.93726
g__Candidatus Mycosynbacter;s__Candidatus Mycosynbacter amalyticus	-0.796044	0.529828	0.132979	0.902969
g__Coprobacillus;s__Coprobacillus sp. CAG:605	0.796035	0.988707	0.420746	0.925397
g__Chengkuizengella;s__Chengkuizengella sediminis	-0.795843	1.23014	0.517661	0.995152
g__Schaalia;s__Schaalia georgiae	-0.795759	NA	NA	NA
g__Unclassified;s__Enterobacteriaceae bacterium 9_2_54FAA	-0.795545	1.4332	0.578838	0.999823
g__Sphingobium;s__Sphingobium sp. EP60837	-0.795448	0.836397	0.341584	0.902969
g__Roseburia;s__Roseburia sp. CAG:380	-0.795258	0.884619	0.368661	0.902969
g__Unclassified;s__virus sp. ctBS918	-0.795147	1.06179	0.453932	0.949709
g__Wujia;s__Wujia sp.	-0.794968	1.73631	0.647061	0.999823
g__Clostridium;s__Clostridium cuniculi	-0.79433	2.02279	0.694548	0.999823
g__Nanosynbacter;s__Candidatus Nanosynbacter sp. TM7-057	-0.794265	1.79886	0.658824	0.999823
g__Klebsiella;s__Klebsiella sp. MS 92-3	0.794121	0.814606	0.329633	0.902969
g__Streptococcus;s__Streptococcus sp. HMSC065E03	-0.793794	0.541346	0.142557	0.902969
g__Unclassified;s__Firmicutes bacterium CAG:341	0.793454	1.29523	0.540142	0.999823
g__Paratractidigestivibacter;s__Paratractidigestivibacter faecalis	-0.793404	0.802524	0.322841	0.902969
g__Caniella;s__Caniella muris	-0.793249	0.335703	0.0181302	0.902969
g__Enorma;s__Enorma sp.	-0.792817	1.04389	0.447562	0.944269
g__Eggerthella;s__Eggerthella sp. CAG:298	-0.792167	1.19915	0.508864	0.989913
g__Thermophilibacter;s__Thermophilibacter mediterraneus	-0.791905	0.743048	0.286536	0.902969
g__Clostridium;s__Clostridium fungisolvens	0.791229	0.868956	0.362532	0.902969
g__Selenobaculum;s__Selenobaculum gbiensis	0.790504	1.05744	0.454721	0.949863
g__Clostridium;s__Clostridium sp. OM05-9	0.789433	0.873347	0.36604	0.902969
g__Ruminococcus;s__Ruminococcus sp. AF12-5	-0.789413	1.60474	0.622771	0.999823
g__Unclassified;s__Candidatus Saccharibacteria bacterium RIFCSPHIGHO2_01_FULL_46_30	0.789389	0.870661	0.36459	0.902969
g__Parolsenella;s__Parolsenella sp.	-0.78894	0.488036	0.105973	0.902969
g__Qingrenia;s__Qingrenia yutianensis	0.788872	NA	NA	NA
g__Salmonella;s__Salmonella sp. S090_02723	-0.788711	1.07199	0.461884	0.953745
g__Anaeroplasma;s__Anaeroplasma bactoclasticum	-0.788614	1.01155	0.43562	0.936538
g__Desulfomarina;s__Desulfomarina profundi	0.788471	1.16704	0.499285	0.98235
g__Streptococcus;s__Streptococcus sp. CF8_St5-17	0.788463	0.523438	0.131986	0.902969
g__Blautia;s__Blautia sp. AM22-22LB	-0.788369	1.36783	0.564368	0.999823
g__Unclassified;s__Ruminococcaceae bacterium BL-4	0.787619	0.430663	0.0674218	0.902969
g__Unclassified;s__Coriobacteriaceae bacterium	-0.787347	1.96814	0.689122	0.999823
g__Coprococcus;s__Coprococcus sp. AF21-14LB	0.787332	1.097	0.472934	0.961782
g__Unclassified;s__Clostridiaceae bacterium JG1575	-0.786875	0.709212	0.267212	0.902969
g__Extibacter;s__Extibacter muris	0.786077	1.31609	0.550317	0.999823
g__Unclassified;s__Siphoviridae sp. ct0Xn2	-0.785626	0.489367	0.108407	0.902969
g__Faecalibacterium;s__Faecalibacterium sp. An121	-0.785522	0.537322	0.143763	0.902969
g__Acutalibacter;s__Acutalibacter sp. M00204	0.785109	1.66974	0.638214	0.999823
g__Barnesiella;s__Barnesiella sp. ET7	0.785078	1.02094	0.441906	0.939194
g__Butyricimonas;s__uncultured Butyricimonas sp.	-0.784876	0.689842	0.25522	0.902969
g__Unclassified;s__Firmicutes bacterium CAG:110_56_8	0.784353	0.694825	0.258962	0.902969
g__Butyrivibrio;s__Butyrivibrio sp. CB08	-0.784185	0.841586	0.351443	0.902969
g__Eubacterium;s__Eubacterium sp. CAG:251	0.783835	3.2712	0.810627	0.999823
g__Unclassified;s__Myoviridae sp. ct3hC12	0.783719	0.847964	0.355363	0.902969
g__Unclassified;s__Bacteriophage sp.	-0.783488	1.03518	0.449134	0.945626
g__Campylobacter;s__Campylobacter hyointestinalis	0.783438	1.191	0.510668	0.990769
g__Desulfonispora;s__Desulfonispora thiosulfatigenes	0.782291	1.09402	0.474572	0.962273
g__Unclassified;s__Firmicutes bacterium CAG:822	0.78196	1.12118	0.485524	0.970977
g__Sporomusa;s__Sporomusa termitida	-0.781445	0.613949	0.203083	0.902969
g__Peptacetobacter;s__Peptacetobacter hominis	0.781214	0.621452	0.208725	0.902969
g__Collinsella;s__Collinsella sp. CAG:398	-0.780924	1.30435	0.549369	0.999823
g__Clostridium;s__Clostridium sp. SM-530-WT-3G	0.780279	0.650543	0.230362	0.902969
g__Enterobacter;s__Enterobacter sp. 170198	-0.780221	1.42029	0.582773	0.999823
g__Adlercreutzia;s__Adlercreutzia sp. ZJ242	-0.779579	0.727363	0.283815	0.902969
g__Lachnoclostridium;s__Lachnoclostridium sp. Marseille-P6806	0.779485	0.678749	0.250798	0.902969
g__Unclassified;s__Siphoviridae sp. ctCb814	-0.779336	0.427166	0.0680865	0.902969
g__Bacteroides;s__Bacteroides sp. AM23-12	0.77842	0.602692	0.196505	0.902969
g__Faecalibacterium;s__Faecalibacterium hominis (ex Afrizal et al. 2022)	-0.778123	1.50023	0.603992	0.999823
g__Prevotella;s__Prevotella denticola	0.777196	1.32462	0.557384	0.999823
g__Fournierella;s__Fournierella sp. CML151	0.77643	0.710762	0.274661	0.902969
g__Paraclostridium;s__Paraclostridium bifermentans	-0.776003	2.21679	0.726295	0.999823
g__Unclassified;s__Podoviridae sp. ct3lO13	-0.775804	0.491975	0.114814	0.902969
g__Bacteroides;s__Bacteroides sp. D2	0.775617	1.45623	0.594297	0.999823
g__Prevotella;s__Prevotella marseillensis	0.775565	0.92795	0.403277	0.916195
g__Haemophilus;s__Haemophilus haemolyticus	0.775531	0.720174	0.28154	0.902969
g__Unclassified;s__Spirochaetae bacterium HGW-Spirochaetae-9	-0.775232	1.28078	0.544993	0.999823
g__Streptococcus;s__Streptococcus sp. CF7_Ac1-12	-0.775023	0.621068	0.212072	0.902969
g__Syntrophaceticus;s__Syntrophaceticus schinkii	0.774857	0.766457	0.312036	0.902969
g__Amedibacterium;s__Absiella sp. AM09-45	0.774667	1.0265	0.450447	0.946529
g__Actinomyces;s__Actinomyces bouchesdurhonensis	-0.77391	1.85537	0.676591	0.999823
g__Paeniclostridium;s__Paeniclostridium hominis	-0.773808	1.44619	0.592604	0.999823
g__Bifidobacterium;s__Bifidobacterium miconisargentati	-0.773801	0.471324	0.100639	0.902969
g__Clostridium;s__Clostridium sp. 1001283B150210_160208_E6	0.773612	1.79965	0.667292	0.999823
g__Streptococcus;s__Streptococcus sp. GP0011	0.773507	0.747011	0.300449	0.902969
g__Sutterella;s__Sutterella wadsworthensis	-0.772684	2.25373	0.731714	0.999823
g__Olsenella;s__Olsenella sp. oral taxon 807	-0.772262	1.46541	0.598198	0.999823
g__Eubacterium;s__Eubacterium sp. TF12-12	-0.772138	0.772071	0.317269	0.902969
g__Bacteroides;s__Bacteroides sp. CAG:1076	-0.771909	0.799887	0.334533	0.902969
g__Hallella;s__Hallella faecis	0.771874	0.508956	0.129372	0.902969
g__Eubacterium;s__Eubacterium sp. CAG:146	-0.771454	0.431411	0.0737419	0.902969
g__Unclassified;s__Myoviridae sp. ct04y17	-0.77142	0.738913	0.296489	0.902969
g__Fibrisoma;s__Fibrisoma montanum	-0.770861	0.396407	0.0518209	0.902969
g__Anoxybacillus;s__Anoxybacillus vitaminiphilus	-0.770435	0.340179	0.0235255	0.902969
g__Blautia;s__Blautia sp. AF19-1	-0.769378	1.53755	0.6168	0.999823
g__Alterileibacterium;s__Alterileibacterium massiliense	-0.769339	0.526076	0.143629	0.902969
g__Turicibacter;s__Turicibacter sp. TS3	0.769251	0.928098	0.407191	0.918226
g__Bacillus;s__Bacillus tianshenii	0.768607	0.764779	0.314894	0.902969
g__Enterococcus;s__Enterococcus alishanensis	-0.768352	0.344233	0.0256106	0.902969
g__Acidaminococcus;s__Acidaminococcus sp.	-0.76817	2.11263	0.71615	0.999823
g__Paenibacillus;s__Paenibacillus thalictri	-0.768129	0.496687	0.121983	0.902969
g__Bacteroides;s__Bacteroides sp. 2_1_33B	0.768027	1.51031	0.611087	0.999823
g__Blautia;s__Blautia sp. MSJ-36	-0.768019	1.15515	0.506137	0.987219
g__Pedobacter;s__Pedobacter fastidiosus	-0.76706	0.598806	0.2002	0.902969
g__Eggerthella;s__Eggerthella timonensis	-0.767059	0.494374	0.120764	0.902969
g__Unclassified;s__Coriobacteriales bacterium DNF00809	0.766538	1.02582	0.454918	0.949896
g__Alistipes;s__Alistipes sp. An116	0.76652	0.79396	0.334325	0.902969
g__Anaerostipes;s__Anaerostipes rhamnosivorans	0.766444	1.14948	0.504917	0.986473
g__Clostridium;s__Clostridium sp. AM34-9AC	0.76584	1.51481	0.61316	0.999823
g__Dorea;s__Dorea sp. D27	0.765619	0.65988	0.245951	0.902969
g__Paenibacillus;s__Paenibacillus alginolyticus	-0.765511	1.00564	0.446526	0.943459
g__Blautia;s__Blautia sp. DFI.9.10	-0.765367	1.31151	0.559504	0.999823
g__Klebsiella;s__Klebsiella spallanzanii	-0.764849	0.338559	0.0238751	0.902969
g__Alkaliphilus;s__Alkaliphilus flagellatus	0.764682	0.909787	0.400624	0.914429
g__Evansella;s__Evansella sp. AB-P1	-0.764555	1.47963	0.605352	0.999823
g__Clostridium;s__Clostridium sp. FS41	0.764279	0.489589	0.11851	0.902969
g__Paenibacillus;s__Paenibacillus taihuensis	0.763754	1.09823	0.486778	0.971814
g__Treponema;s__Treponema pectinovorum	-0.763465	1.47945	0.605822	0.999823
g__Terrilactibacillus;s__Terrilactibacillus tamarindi	-0.763403	1.49028	0.608473	0.999823
g__Bacillus;s__Bacillus sp. S3	0.763263	0.72381	0.291651	0.902969
g__Unclassified;s__Siphoviridae sp. ct3r22	0.762731	0.518529	0.141304	0.902969
g__Unclassified;s__Myoviridae sp. ctCXW4	0.762375	1.8754	0.684366	0.999823
g__Leuconostoc;s__Leuconostoc suionicum	-0.762049	0.817831	0.351444	0.902969
g__Streptococcus;s__Streptococcus sobrinus	-0.761317	0.632746	0.228901	0.902969
g__Citrobacter;s__Citrobacter sp. Igbk 17	-0.760887	0.485345	0.116946	0.902969
g__Peptoanaerobacter;s__[Eubacterium] yurii	-0.760848	0.941569	0.419053	0.924244
g__Prevotella;s__Prevotella sp. CAG:924	0.760239	1.07573	0.47974	0.96635
g__Unclassified;s__Enterobacteriaceae bacterium ATCC 29904	-0.759851	1.12287	0.498592	0.981534
g__Paenibacillus;s__Paenibacillus gallinarum	-0.759199	1.30689	0.561294	0.999823
g__Prevotella;s__Prevotella sp. P5-64	0.759127	0.482084	0.115331	0.902969
g__Unclassified;s__Siphoviridae sp. ctA995	-0.759074	1.51727	0.616871	0.999823
g__Sphingomonas;s__uncultured Sphingomonas sp.	-0.759015	0.394048	0.0540794	0.902969
g__Faecalibacterium;s__Faecalibacterium sp. CAG:74_58_120	-0.758874	2.58705	0.769266	0.999823
g__Unclassified;s__Flavobacteria bacterium RIFCSPLOWO2_12_FULL_35_11	-0.758495	0.427274	0.0758652	0.902969
g__Massilibacillus;s__Massilibacillus massiliensis	0.758494	0.671649	0.25877	0.902969
g__Anaerorhabdus;s__Anaerorhabdus sp.	0.758384	0.924735	0.412154	0.920225
g__Streptococcus;s__Streptococcus sp. LQJ-218	0.758284	0.974565	0.436525	0.937495
g__Unclassified;s__uncultured bacterium Contig1761	0.75811	1.06173	0.475206	0.96253
g__Methanobrevibacter;s__Methanobrevibacter curvatus	-0.757842	0.228089	0.000891942	0.902969
g__Unclassified;s__Firmicutes bacterium ADurb.Bin419	0.75784	0.637674	0.234658	0.902969
g__Sphingomonas;s__Sphingomonas psychrolutea	-0.757594	1.15788	0.512921	0.992849
g__Rubeoparvulum;s__Rubeoparvulum massiliense	-0.756743	1.06335	0.476674	0.963622
g__Geobacillus;s__Geobacillus sp. ZGt-1	0.756495	1.41479	0.592855	0.999823
g__Unclassified;s__Firmicutes bacterium CAG:24	-0.756258	0.692033	0.274479	0.902969
g__Neisseria;s__Neisseria elongata	0.75485	0.742517	0.309339	0.902969
g__Hathewaya;s__Hathewaya histolytica	0.754689	0.853855	0.376771	0.902969
g__Unclassified;s__Bifidobacteriaceae bacterium MCC01964	-0.754433	0.734302	0.304225	0.902969
g__Ruminococcus;s__Ruminococcus sp. 1001270H_150608_F2	0.75427	1.23068	0.539951	0.999823
g__Actinomyces;s__Actinomyces sp. oral taxon 848	0.754149	0.769561	0.3271	0.902969
g__Unclassified;s__Erysipelotrichaceae bacterium AM07-35-1	0.753982	1.50581	0.616572	0.999823
g__Dialister;s__Dialister sp. CAG:486	0.753842	0.774663	0.330493	0.902969
g__Clostridium;s__Clostridium sp. AF17-21AC	0.752917	0.486649	0.121828	0.902969
g__Streptococcus;s__Streptococcus sp. HMSC072C09	-0.752506	0.481467	0.118066	0.902969
g__Collinsella;s__Collinsella sp. AM17-1	-0.752405	0.461649	0.10314	0.902969
g__Blautia;s__Blautia sp. AF13-16	-0.752119	1.28212	0.557458	0.999823
g__Caldibacillus;s__Caldibacillus thermoamylovorans	0.752035	0.920298	0.413834	0.921394
g__Butyrivibrio;s__Butyrivibrio sp. AE2005	-0.751617	1.23178	0.541738	0.999823
g__Unclassified;s__virus sp. ctqEG8	0.751603	0.378784	0.0472276	0.902969
g__Coprococcus;s__Coprococcus hominis (ex Liu et al. 2022)	0.75145	0.838376	0.370084	0.902969
g__Sphingobium;s__Sphingobium sp. Ndbn-10	0.751263	0.249968	0.00265203	0.902969
g__Fibrobacter;s__Fibrobacter sp. UWT3	-0.751185	1.19788	0.530597	0.999823
g__Citrobacter;s__Citrobacter sp. Cb036	-0.750388	1.49902	0.616662	0.999823
g__Paenibacillus;s__Paenibacillus zanthoxyli	0.749823	0.906094	0.407935	0.918226
g__Parvibacter;s__Parvibacter caecicola	-0.749761	0.524203	0.152635	0.902969
g__Candidatus Ordinivivax;s__Candidatus Ordinivivax streblomastigis	0.749187	0.970086	0.439943	0.937843
g__Tepidanaerobacter;s__Tepidanaerobacter syntrophicus	0.749142	0.812919	0.356766	0.902969
g__Parasutterella;s__uncultured Parasutterella sp.	0.748501	0.798249	0.348409	0.902969
g__Kiritimatiella;s__Kiritimatiella glycovorans	0.748327	1.55968	0.631373	0.999823
g__Pseudoleptotrichia;s__Pseudoleptotrichia goodfellowii	-0.748256	0.500991	0.135293	0.902969
g__Clostridium;s__Clostridium sp. CAG:793	-0.747266	1.05519	0.478832	0.965774
g__Flavonifractor;s__Flavonifractor sp. An4	0.747238	0.493756	0.130185	0.902969
g__Clostridium;s__Clostridium sp. CAG:226	0.747214	0.805807	0.353778	0.902969
g__Desulfuribacillus;s__Desulfuribacillus stibiiarsenatis	0.746654	0.374675	0.0462832	0.902969
g__Reyranella;s__uncultured Reyranella sp.	0.74651	1.45029	0.606741	0.999823
g__Klebsiella;s__Klebsiella sp. STW0522-44	-0.746128	0.43431	0.0858033	0.902969
g__Blautia;s__Blautia faecicola	-0.745956	1.08036	0.4899	0.974376
g__Desulforamulus;s__Desulforamulus hydrothermalis	0.745563	0.694459	0.283007	0.902969
g__Desulfovibrio;s__Desulfovibrio sp. X2	-0.745223	0.390054	0.0560608	0.902969
g__Phocaeicola;s__Phocaeicola abscessus	-0.745085	0.352208	0.0343901	0.902969
g__Azospirillum;s__Azospirillum sp.	-0.744853	0.738362	0.313075	0.902969
g__Olsenella;s__Olsenella sp. An188	-0.744595	0.816001	0.361509	0.902969
g__Unclassified;s__Candidatus Margulisbacteria bacterium GWF2_35_9	0.744305	1.33791	0.577992	0.999823
g__Unclassified;s__Myoviridae sp. ct7Q419	-0.744214	1.75573	0.671656	0.999823
g__Methanobrevibacter;s__Methanobrevibacter woesei	0.744152	1.22105	0.542234	0.999823
g__Unclassified;s__Siphoviridae sp. ctmTU3	0.743487	0.978839	0.447518	0.944269
g__Selenomonas;s__uncultured Selenomonas sp.	0.743484	0.496597	0.134352	0.902969
g__Faecalibacterium;s__Faecalibacterium sp. HTF-F	0.743327	0.620716	0.231099	0.902969
g__Clostridium;s__Clostridium sp. SY8519	-0.743001	1.70656	0.663287	0.999823
g__Listeria;s__Listeria seeligeri	-0.742617	0.817345	0.363576	0.902969
g__Sedimentibacter;s__Sedimentibacter sp. B4	-0.742398	0.812683	0.360972	0.902969
g__Flavobacterium;s__Flavobacterium sp. HJJ	0.742176	1.00054	0.458225	0.950994
g__Fusobacterium;s__Fusobacterium sp. CM21	0.741722	0.430555	0.084941	0.902969
g__Ruminococcus;s__Ruminococcus sp. AF16-50	0.741347	1.32854	0.576834	0.999823
g__Bacteroides;s__Bacteroides sp. CAG:633	-0.741289	1.12325	0.509286	0.989913
g__Coprococcus;s__Coprococcus sp. AM100_B19A	-0.74106	1.64451	0.652258	0.999823
g__Klebsiella;s__Klebsiella sp. KTE92	-0.740696	1.07052	0.489	0.973682
g__Arthrobacter;s__Arthrobacter sp. 9AX	-0.740435	0.532804	0.164621	0.902969
g__Collinsella;s__Collinsella sp. AF19-7AC	-0.74022	0.622157	0.234139	0.902969
g__Drancourtella;s__Drancourtella sp. An210	-0.740087	1.46869	0.614325	0.999823
g__Paenibacillus;s__Paenibacillus caui	0.739818	1.01958	0.468076	0.958511
g__Treponema;s__Treponema sp.	0.739768	0.579817	0.202004	0.902969
g__Enterobacter;s__Enterobacter sp.	-0.739643	0.781155	0.343711	0.902969
g__Sphingobium;s__Sphingobium sp. D43FB	-0.739613	1.29668	0.568414	0.999823
g__Fructobacillus;s__Fructobacillus pseudoficulneus	-0.739597	0.285586	0.00960458	0.902969
g__Flavonifractor;s__Flavonifractor sp. An9	0.739536	0.599087	0.21704	0.902969
g__Bacillus;s__Bacillus sp. FJAT-27986	0.739034	0.297159	0.0128826	0.902969
g__Butyrivibrio;s__Butyrivibrio sp. TB	0.738855	0.810851	0.362185	0.902969
g__Unclassified;s__Siphoviridae sp. ctuOq1	0.738719	0.699051	0.290628	0.902969
g__Citrobacter;s__Citrobacter sp. S46_ASV_140	-0.738679	0.460591	0.108766	0.902969
g__Blautia;s__Blautia sp. OF03-13	-0.738586	1.58721	0.641691	0.999823
g__Nanosynbacter;s__Candidatus Nanosynbacter sp. TM7-076	-0.738522	1.7406	0.671352	0.999823
g__Desulfovibrio;s__Desulfovibrio sp. UIB00	-0.738233	1.41751	0.602509	0.999823
g__Prevotella;s__Prevotella sp. TF12-30	-0.737825	1.43834	0.607972	0.999823
g__Bacteroides;s__Bacteroides heparinolyticus	0.737728	0.572078	0.197204	0.902969
g__Mycoplasma;s__Mycoplasma sp. CAG:776	0.737412	0.3553	0.0379438	0.902969
g__Bacteroides;s__Bacteroides mediterraneensis	0.736945	0.669919	0.27131	0.902969
g__Fusobacterium;s__Fusobacterium equinum	-0.736823	0.77935	0.344438	0.902969
g__Unclassified;s__Ruminococcaceae bacterium YRB3002	0.736496	0.582146	0.205822	0.902969
g__Unclassified;s__Podoviridae sp. ctdRZ1	0.73631	0.865435	0.394882	0.910254
g__Enterorhabdus;s__Enterorhabdus sp. NM05_H27	-0.736303	0.805526	0.360683	0.902969
g__Fibrobacter;s__Fibrobacter sp. UBA4297	0.735366	1.42005	0.604566	0.999823
g__Mediterraneibacter;s__Mediterraneibacter catenae	0.735282	0.501082	0.14227	0.902969
g__Unclassified;s__Veillonellaceae bacterium DNF00751	0.73474	2.18711	0.736915	0.999823
g__Sanguibacteroides;s__uncultured Sanguibacteroides sp.	-0.734164	1.36462	0.590578	0.999823
g__Candidatus Epulonipiscium;s__Epulopiscium sp. Nele67-Bin004	-0.734137	0.822442	0.372055	0.902969
g__Clostridium;s__Clostridium paraputrificum	-0.73387	1.93585	0.704618	0.999823
g__Unclassified;s__Siphoviridae sp. ctbvd11	0.733848	2.39906	0.759688	0.999823
g__Gordonibacter;s__Gordonibacter sp.	-0.733718	0.887657	0.408476	0.918226
g__Ruminococcus;s__Ruminococcus sp. MSJ-25	0.733516	0.774607	0.343663	0.902969
g__Dorea;s__Dorea acetigenes	0.732577	0.621592	0.238578	0.902969
g__Bacteroides;s__Bacteroides fluxus	0.732274	1.34386	0.585821	0.999823
g__Metabacillus;s__Metabacillus litoralis	0.732157	1.17363	0.532735	0.999823
g__Clostridium;s__Clostridium sp. OM04-12AA	-0.731967	1.33609	0.5838	0.999823
g__Eubacterium;s__Eubacterium sp. CAG:192	0.731928	0.627078	0.243128	0.902969
g__Burkholderia;s__Burkholderia cepacia	0.731716	1.19678	0.540931	0.999823
g__Koleobacter;s__Koleobacter methoxysyntrophicus	-0.731539	0.743896	0.325416	0.902969
g__Unclassified;s__Gemmatimonadota bacterium	-0.731305	1.26482	0.563135	0.999823
g__Oceanivirga;s__Oceanivirga salmonicida	-0.731165	0.555967	0.188469	0.902969
g__Bacteroides;s__Candidatus Bacteroides intestinigallinarum	0.731132	0.579531	0.207095	0.902969
g__Clostridium;s__Clostridium sp. BIOML-A1	0.730898	0.715739	0.307169	0.902969
g__Mediterraneibacter;s__Mediterraneibacter faecis	-0.730172	1.10667	0.509387	0.989913
g__Odoribacter;s__Odoribacter lunatus	-0.73007	1.93348	0.705733	0.999823
g__Oscillibacter;s__Oscillibacter sp. CAG:155	0.729843	0.536409	0.173637	0.902969
g__Paenibacillus;s__Paenibacillus borealis	0.729835	1.02577	0.476774	0.963641
g__Scardovia;s__Scardovia wiggsiae	-0.729802	1.78106	0.681984	0.999823
g__Unclassified;s__Myoviridae sp. ctr0w28	-0.729563	0.933433	0.434455	0.936323
g__Kineothrix;s__Kineothrix sp. MB12-C1	0.729215	0.547262	0.182702	0.902969
g__Schinkia;s__Schinkia azotoformans	0.729146	0.685673	0.2876	0.902969
g__Clostridium;s__Clostridium sp. CAG:505	0.728924	0.756442	0.335236	0.902969
g__Sphingomonas;s__Sphingomonas sp. CCH10-B3	-0.728569	0.40137	0.0694921	0.902969
g__Eggerthella;s__Eggerthella lenta	-0.728427	1.10432	0.5095	0.989952
g__Anaerostipes;s__Anaerostipes sp. 494a	-0.72836	0.809289	0.36812	0.902969
g__Barnesiella;s__Barnesiella sp.	-0.728216	0.569254	0.20081	0.902969
g__Nanosynbacter;s__Candidatus Nanosynbacter featherlites	-0.728076	1.73035	0.673924	0.999823
g__Veillonella;s__Veillonella rogosae	0.727886	1.94723	0.708549	0.999823
g__Tenggerimyces;s__Tenggerimyces flavus	-0.727442	1.4403	0.613515	0.999823
g__Faecalibacterium;s__Faecalibacterium sp. BIOML-A4	-0.727027	0.819617	0.375061	0.902969
g__Alistipes;s__Alistipes sp. CAG:29	-0.726846	0.730608	0.319809	0.902969
g__Unclassified;s__Ruminococcaceae bacterium KH2T8	0.726643	0.798307	0.362701	0.902969
g__Ruminococcus;s__Ruminococcus sp. FC2018	0.726631	0.77951	0.351252	0.902969
g__Bifidobacterium;s__Bifidobacterium moukalabense	0.726078	0.785515	0.355313	0.902969
g__Collinsella;s__Collinsella sp. D33t1_170424_A12	0.725929	1.05783	0.492561	0.975823
g__Butyrivibrio;s__Butyrivibrio sp. AD3002	-0.725907	0.90041	0.42013	0.925248
g__Emticicia;s__Emticicia sp. CRIBPO	-0.725822	0.361986	0.044951	0.902969
g__Bacillus;s__Bacillus kwashiorkori	-0.725781	1.22385	0.553162	0.999823
g__Streptococcus;s__Streptococcus loxodontisalivarius	-0.725454	0.516544	0.160189	0.902969
g__Anaerocolumna;s__Anaerocolumna sp. AGMB13025	0.725339	1.36231	0.594425	0.999823
g__Deinococcus;s__Deinococcus aestuarii	-0.725283	1.3454	0.589831	0.999823
g__Virgibacillus;s__Virgibacillus halotolerans	-0.72521	1.36504	0.595229	0.999823
g__Carnobacterium;s__Carnobacterium iners	-0.72512	1.5634	0.642785	0.999823
g__Collinsella;s__Collinsella sp. AF36-3AT	-0.725021	0.57563	0.207841	0.902969
g__Oribacterium;s__Oribacterium sp. FC2011	0.7248	0.613218	0.237221	0.902969
g__Ruminococcus;s__Ruminococcus sp. CAG:353	0.724715	0.598411	0.22587	0.902969
g__Megasphaera;s__Megasphaera hutchinsoni	-0.724681	0.563845	0.198705	0.902969
g__Bacteroides;s__Bacteroides sp. AM16-15	0.724655	0.621808	0.243857	0.902969
g__Serratia;s__Serratia nevei	-0.724375	1.55511	0.641356	0.999823
g__Sphingobium;s__Sphingobium cloacae	-0.724108	0.935043	0.438687	0.93753
g__Ruminococcus;s__Ruminococcus sp. SR1_5	-0.723661	1.0094	0.473424	0.961782
g__Unclassified;s__Bifidobacteriaceae bacterium MCC01971	-0.723471	0.707588	0.30657	0.902969
g__Paenibacillus;s__Paenibacillus montanisoli	-0.723309	1.11733	0.517404	0.995152
g__Varibaculum;s__uncultured Varibaculum sp.	0.723248	1.14854	0.528883	0.999823
g__Komagataeibacter;s__Komagataeibacter nataicola	0.723093	1.11212	0.515567	0.994298
g__Unclassified;s__Sphingomonadales bacterium	-0.722517	0.609328	0.235717	0.902969
g__Streptococcus;s__Streptococcus sp. Marseille-P6264	-0.722333	0.51251	0.158716	0.902969
g__Unclassified;s__Bifidobacteriaceae bacterium NR020	0.722322	1.25305	0.56431	0.999823
g__Unclassified;s__Siphoviridae sp. ctiMX17	0.721826	0.379766	0.0573394	0.902969
g__Akkermansia;s__Akkermansia muciniphila	-0.721712	1.55831	0.643266	0.999823
g__Unclassified;s__Siphoviridae sp. ct5Px37	0.721476	0.336026	0.0317865	0.902969
g__Unclassified;s__Firmicutes bacterium AF19-2LB	0.721448	0.906135	0.425926	0.93046
g__Unclassified;s__Firmicutes bacterium M10-2	-0.721418	1.04098	0.488297	0.97283
g__Unclassified;s__Muribaculaceae bacterium Isolate-013 (NCI)	0.720852	0.638114	0.258619	0.902969
g__Clostridium;s__Clostridium sp. CAG:354	0.720337	0.676776	0.287163	0.902969
g__Romboutsia;s__Romboutsia sp. 1001713B170207_170306_H8	0.719974	0.701491	0.304728	0.902969
g__Nanosynbacter;s__Candidatus Nanosynbacter sp. TM7-053	-0.71994	1.78038	0.685938	0.999823
g__Bacillus;s__Bacillus wiedmannii	-0.719712	1.51896	0.635628	0.999823
g__Pedobacter;s__Pedobacter changchengzhani	-0.719688	0.315949	0.0227349	0.902969
g__Kehishuvirus;s__Kehishuvirus splanchnicus	-0.719314	0.485566	0.138502	0.902969
g__Candidatus Microsaccharimonas;s__Candidatus Microsaccharimonas sossegonensis	0.718788	1.15234	0.532784	0.999823
g__Sporolactobacillus;s__Sporolactobacillus sp. CQH2019	-0.718625	1.37716	0.601797	0.999823
g__Prevotella;s__Prevotella sp. MGM1	0.718322	0.409738	0.0795805	0.902969
g__Bacteroides;s__Bacteroides sp. 3_1_23	0.718158	1.49272	0.63044	0.999823
g__Pedobacter;s__Pedobacter sp. PLR	0.717885	0.949608	0.449661	0.945626
g__Unclassified;s__Bacteroidales bacterium Barb4	0.717757	0.455579	0.115145	0.902969
g__Sporolactobacillus;s__Sporolactobacillus inulinus	-0.717313	0.99437	0.470679	0.95974
g__Clostridium;s__Clostridium akagii	0.716611	0.392321	0.0677611	0.902969
g__Unclassified;s__Myoviridae sp. ctAys2	0.716165	1.41796	0.613512	0.999823
g__Rikenella;s__uncultured Rikenella sp.	0.716161	0.995525	0.471907	0.960952
g__Unclassified;s__Candidatus Saccharibacteria bacterium 32-45-3	-0.715528	0.588511	0.224051	0.902969
g__Candidatus Minimicrobia;s__Candidatus Minimicrobia vallesae	-0.71535	1.58569	0.651896	0.999823
g__Clostridium;s__Clostridium luticellarii	-0.715311	0.332814	0.0316119	0.902969
g__Ruminococcus;s__Ruminococcus sp. AM16-34	-0.715033	1.4882	0.630894	0.999823
g__Unclassified;s__Flammeovirgaceae bacterium 311	-0.71436	0.407586	0.0796604	0.902969
g__Actinomyces;s__Actinomyces ruminicola	-0.714246	1.07498	0.506416	0.987582
g__Coprobacter;s__uncultured Coprobacter sp.	0.71396	0.608462	0.240642	0.902969
g__Faecalibacterium;s__Faecalibacterium sp. Marseille-Q4137	-0.713889	1.6473	0.664747	0.999823
g__Sphingomonas;s__Sphingomonas sp. ERG5	-0.713779	0.431073	0.0977585	0.902969
g__Unclassified;s__Lentisphaerae bacterium GWF2_50_93	-0.713611	0.850355	0.401362	0.914429
g__Hungatella;s__Hungatella sp.	0.713276	1.19277	0.549839	0.999823
g__Unclassified;s__uncultured bacterium Contigcl_1539	0.713223	0.839832	0.395745	0.910748
g__Youngiibacter;s__Youngiibacter multivorans	-0.71245	0.687576	0.30012	0.902969
g__Sutterella;s__Sutterella parvirubra	0.712209	1.09695	0.516166	0.994805
g__Coprococcus;s__Coprococcus sp. AM14-16	0.712169	0.443512	0.108329	0.902969
g__Muribaculum;s__uncultured Muribaculum sp.	-0.712132	0.777642	0.359794	0.902969
g__Unclassified;s__Firmicutes bacterium CAG:313	0.711606	0.603084	0.238022	0.902969
g__Ruminococcus;s__Ruminococcus sp. CAG:57	0.711272	1.02587	0.488101	0.972622
g__Ruminococcus;s__Ruminococcus sp. AM32-17LB	-0.71095	1.21642	0.558911	0.999823
g__Bifidobacterium;s__Bifidobacterium tsurumiense	-0.710921	0.682239	0.297392	0.902969
g__Fundicoccus;s__Fundicoccus culcitae	-0.710526	0.995132	0.475226	0.96253
g__Romboutsia;s__uncultured Romboutsia sp.	-0.710338	2.30332	0.75778	0.999823
g__Unclassified;s__Firmicutes bacterium ADurb.Bin262	-0.710216	1.20585	0.555877	0.999823
g__Paenibacillus;s__Paenibacillus sp. P1XP2	0.710194	1.11262	0.523273	0.998333
g__Campylobacter;s__Campylobacter helveticus	0.710177	0.991993	0.474047	0.961829
g__Dechloromonas;s__Dechloromonas sp. H13	-0.709892	1.15727	0.539598	0.999823
g__Novosphingobium;s__Novosphingobium sp. FKTRR1	-0.709476	0.550284	0.197297	0.902969
g__Rodentibacter;s__Rodentibacter sp. JRC1	0.709041	0.730293	0.331599	0.902969
g__Enterococcus;s__Enterococcus innesii	-0.708436	0.491655	0.149607	0.902969
g__Rhodococcus;s__Rhodococcus pyridinivorans	-0.708332	0.856432	0.408195	0.918226
g__Corynebacterium;s__Corynebacterium atrinae	-0.708326	0.306168	0.0206941	0.902969
g__Clostridium;s__Clostridium sp. AF22-10	0.708203	1.87283	0.705323	0.999823
g__Coprobacillus;s__Coprobacillus sp. AF34-1BH	0.708178	1.28732	0.58224	0.999823
g__Legionella;s__Legionella lansingensis	0.708167	1.44202	0.623361	0.999823
g__Selenomonas;s__Selenomonas ruminis	-0.707987	1.51579	0.640446	0.999823
g__Unclassified;s__Siphoviridae sp. ctZCl11	-0.707269	0.947344	0.455317	0.950022
g__Propionibacterium;s__Propionibacterium sp.	-0.707157	0.958183	0.460503	0.952365
g__Unclassified;s__Candidatus Saccharibacteria bacterium oral taxon 488	-0.707068	1.49154	0.635464	0.999823
g__Priestia;s__Priestia endophytica	0.706945	0.337775	0.0363541	0.902969
g__Unclassified;s__Tenericutes bacterium GWF2_57_13	-0.706724	0.841959	0.401256	0.914429
g__Pyramidobacter;s__Pyramidobacter sp.	-0.706646	0.826084	0.392321	0.908353
g__Herbaspirillum;s__Herbaspirillum rhizosphaerae	-0.706509	0.528184	0.18102	0.902969
g__Unclassified;s__Bacteroides phage p00	0.706392	1.2232	0.563605	0.999823
g__Mediterraneibacter;s__Mediterraneibacter sp. 210702-DFI.5.30	-0.705812	0.503976	0.161367	0.902969
g__Methylomonas;s__Methylomonas montana	0.70575	0.461682	0.126351	0.902969
g__Slackia;s__uncultured Slackia sp.	-0.705361	1.80294	0.695629	0.999823
g__Heyndrickxia;s__Heyndrickxia camelliae	0.705331	0.945407	0.455631	0.950022
g__Desemzia;s__Desemzia incerta	-0.704686	1.4193	0.619541	0.999823
g__Clostridium;s__Clostridium muellerianum	0.70439	0.969008	0.467275	0.95833
g__Unclassified;s__Myoviridae sp. ctXVO17	-0.70406	2.07703	0.734629	0.999823
g__Ruminococcus;s__Ruminococcus sp. AM31-15AC	0.703753	0.918762	0.443688	0.940342
g__Symbiobacterium;s__Symbiobacterium thermophilum	0.703432	0.860658	0.413746	0.921394
g__Blautia;s__Blautia sp. AF25-12LB	-0.703076	2.06218	0.73315	0.999823
g__Unclassified;s__Alphaproteobacteria bacterium HGW-Alphaproteobacteria-16	-0.702964	0.511386	0.169248	0.902969
g__Unclassified;s__Siphoviridae sp. ctX926	0.702849	1.25814	0.576408	0.999823
g__Actinomyces;s__Actinomyces sp. ICM47	-0.702408	1.43697	0.624975	0.999823
g__Bacteroides;s__Bacteroides rodentium	0.702354	0.466297	0.132007	0.902969
g__Actinomyces;s__Actinomyces sp. oral taxon 170	-0.702018	0.594976	0.238036	0.902969
g__Corynebacterium;s__Corynebacterium glyciniphilum	-0.701412	0.98817	0.477823	0.964374
g__Adlercreutzia;s__Adlercreutzia sp. ZJ176	-0.701219	1.31863	0.594881	0.999823
g__Clostridium;s__Clostridium sp. N3C	-0.700523	0.932589	0.452557	0.948069
g__Ruminococcus;s__Ruminococcus sp. CAG:403	0.700435	0.833721	0.400835	0.914429
g__Dorea;s__Dorea sp. 210702-DFI.3.17	-0.700144	1.29925	0.589967	0.999823
g__Heliomicrobium;s__Heliomicrobium gestii	-0.700086	1.3763	0.610981	0.999823
g__Desulfobotulus;s__Desulfobotulus alkaliphilus	0.69984	0.670821	0.296828	0.902969
g__Hallella;s__Hallella colorans	-0.699586	2.515	0.780886	0.999823
g__Blautia;s__Blautia sp. NSJ-140	-0.699576	1.52824	0.647121	0.999823
g__Unclassified;s__Siphoviridae sp. ctLgc23	-0.699547	1.35827	0.606534	0.999823
g__Unclassified;s__Podoviridae sp. ctxqo3	0.698999	0.359793	0.0520426	0.902969
g__Vibrio;s__Vibrio artabrorum	-0.698963	0.917597	0.44622	0.943445
g__Butyrivibrio;s__Butyrivibrio sp. LB2008	0.698709	0.427056	0.101818	0.902969
g__Neobacillus;s__Neobacillus drentensis	-0.69855	1.60983	0.664341	0.999823
g__Vallitalea;s__Vallitalea guaymasensis	0.698546	0.641716	0.276348	0.902969
g__Unclassified;s__Bifidobacteriaceae bacterium MCC01941	-0.698332	1.47711	0.636378	0.999823
g__Ruminococcus;s__Ruminococcus sp. CAG:330	0.697333	1.03476	0.50037	0.982843
g__Unclassified;s__Bacteroidetes bacterium HLUCCA01	-0.697329	1.26519	0.581521	0.999823
g__Nanosynbacter;s__Candidatus Nanosynbacter sp. TM7-075	-0.696932	1.86659	0.708872	0.999823
g__Victivallis;s__Victivallis lenta	0.696916	1.6255	0.668112	0.999823
g__Unclassified;s__Siphoviridae sp. ct7yc1	0.696591	0.460683	0.130512	0.902969
g__Candidatus Planktophila;s__Candidatus Planktophila versatilis	-0.696489	1.26955	0.583272	0.999823
g__Bifidobacterium;s__uncultured Bifidobacterium sp.	-0.696299	1.53396	0.649885	0.999823
g__Parabacteroides;s__Parabacteroides sp. AM44-16	0.695878	0.600614	0.246615	0.902969
g__Clostridium;s__Clostridium celatum	-0.695867	2.08873	0.739019	0.999823
g__Thermohydrogenium;s__Thermohydrogenium kirishiense	-0.695456	1.49897	0.642679	0.999823
g__Unclassified;s__Candidatus Uhrbacteria bacterium RIFOXYC2_FULL_47_19	-0.695447	1.22705	0.570874	0.999823
g__Pseudoalteromonas;s__Pseudoalteromonas sp. S408	-0.69529	0.685397	0.310375	0.902969
g__Clostridium;s__Clostridium sp. CAG:533	0.694366	0.50914	0.17263	0.902969
g__Streptococcus;s__Streptococcus sp. BIOML-A1	0.694345	1.28882	0.590062	0.999823
g__Gracilibacillus;s__Gracilibacillus saliphilus	-0.69429	1.46813	0.63628	0.999823
g__Lacticaseibacillus;s__Lacticaseibacillus paracasei	-0.694207	0.635658	0.274786	0.902969
g__Clostridium;s__Clostridium sp. AF36-18BH	0.694112	1.41531	0.623829	0.999823
g__Nanosynbacter;s__Candidatus Nanosynbacter sp. TM7-008	-0.694077	1.83577	0.705368	0.999823
g__Unclassified;s__Siphoviridae sp. ctHAs12	-0.693743	1.4707	0.637134	0.999823
g__Aequorivita;s__Aequorivita todarodis	-0.69373	0.386722	0.0728332	0.902969
g__Unclassified;s__Firmicutes bacterium CAG:56	-0.693499	0.742288	0.350164	0.902969
g__Unclassified;s__Myoviridae sp. cte5Z19	-0.693285	0.41733	0.0966657	0.902969
g__Butyrivibrio;s__uncultured Butyrivibrio sp.	0.693167	0.68994	0.315052	0.902969
g__Unclassified;s__Siphoviridae sp. ctfeV1	0.693111	0.745521	0.352526	0.902969
g__Clostridium;s__Clostridium kluyveri	0.692694	0.544218	0.203081	0.902969
g__Dethiosulfovibrio;s__Dethiosulfovibrio peptidovorans	0.692598	0.775811	0.371996	0.902969
g__Unclassified;s__Proteobacteria bacterium ST_bin13	0.692574	0.389539	0.075415	0.902969
g__Ruminococcus;s__Ruminococcus sp. CAG:9	-0.692441	1.21898	0.570003	0.999823
g__Streptococcus;s__Streptococcus sp. HMSC078D09	-0.692384	1.49746	0.643813	0.999823
g__Oscillibacter;s__Oscillibacter valericigenes	0.692338	1.37527	0.61467	0.999823
g__Paenibacillus;s__Paenibacillus ferrarius	0.691734	0.621706	0.265864	0.902969
g__Unclassified;s__Proteobacteria bacterium CAG:139	0.69089	0.969548	0.476099	0.963379
g__Unclassified;s__virus sp. ctU8j8	0.690866	0.436899	0.113811	0.902969
g__Unclassified;s__Siphoviridae sp. ctGdK3	0.690465	1.28526	0.591117	0.999823
g__Unclassified;s__Myoviridae sp. ctr9D2	0.690239	0.952158	0.468501	0.958803
g__Thermanaeromonas;s__Thermanaeromonas toyohensis	0.690133	0.560756	0.218428	0.902969
g__Bifidobacterium;s__Bifidobacterium angulatum	-0.690106	0.692794	0.319191	0.902969
g__Amedibacterium;s__Absiella sp. AM27-20	0.689972	1.25749	0.583218	0.999823
g__Dyadobacter;s__Dyadobacter sp. CY345	0.6888	0.451029	0.126717	0.902969
g__Clostridium;s__Clostridium saudiense	-0.688693	2.06694	0.738987	0.999823
g__Yersinia;s__Yersinia ruckeri	-0.688659	0.417062	0.0986945	0.902969
g__Eggerthella;s__Eggerthella sp. CAG:209	-0.688279	0.370319	0.0630823	0.902969
g__Lactobacillus;s__Lactobacillus sp. PV034	0.688231	1.56577	0.660265	0.999823
g__Dysgonomonas;s__Dysgonomonas sp. Marseille-P4677	-0.688207	1.31348	0.600308	0.999823
g__Thermoanaerobacterium;s__Thermoanaerobacterium butyriciformans	0.688017	1.35112	0.610599	0.999823
g__Unclassified;s__Siphoviridae sp. ctTqe2	0.687882	1.19299	0.564206	0.999823
g__Unclassified;s__Acidimicrobiia bacterium	-0.687864	0.939257	0.463956	0.956148
g__Hathewaya;s__Hathewaya massiliensis	0.687812	0.442556	0.120141	0.902969
g__Blautia;s__Blautia sp. MSK20_18	-0.687606	1.67621	0.681649	0.999823
g__Thauera;s__Thauera aminoaromatica	-0.687587	0.889211	0.439372	0.93753
g__Unclassified;s__Peptococcaceae bacterium BRH_c23	0.687489	0.979648	0.482821	0.968405
g__Lachnobacterium;s__Lachnobacterium bovis	0.687303	0.420415	0.102087	0.902969
g__Porphyromonas;s__Porphyromonas pogonae	0.687088	0.617934	0.266176	0.902969
g__Halomonas;s__Halomonas sp. ATBC28	-0.687083	0.706454	0.330762	0.902969
g__Citrobacter;s__Citrobacter sp. Cy070	0.686691	1.39964	0.623697	0.999823
g__Ruminococcus;s__Ruminococcus sp. OF05-2BH	-0.686018	NA	NA	NA
g__Galbibacter;s__Galbibacter orientalis	0.685893	0.940572	0.465862	0.957211
g__Unclassified;s__bacterium P201	0.685827	1.27642	0.591056	0.999823
g__Polaribacter;s__Polaribacter sejongensis	-0.685524	0.422106	0.104364	0.902969
g__Burkholderia;s__Burkholderia sp. Ac-20384	-0.684175	0.565038	0.225954	0.902969
g__Competibacter;s__Candidatus Competibacter denitrificans	-0.683229	0.516014	0.185486	0.902969
g__Eubacterium;s__Eubacterium sp. LFL-14	-0.683141	1.20496	0.570753	0.999823
g__Deinococcus;s__Deinococcus aerolatus	-0.683075	1.0938	0.532301	0.999823
g__Ruminococcus;s__Ruminococcus sp. AF41-9	-0.682516	1.18041	0.563129	0.999823
g__Ruminococcus;s__Ruminococcus sp. OF03-6AA	-0.682489	1.15215	0.553609	0.999823
g__Ruminococcus;s__Ruminococcus sp. AF31-16BH	-0.68237	1.69279	0.686871	0.999823
g__Flavonifractor;s__Flavonifractor sp. An82	0.682321	1.40896	0.628192	0.999823
g__Ruminococcus;s__Ruminococcus sp. AM12-48	-0.682175	1.25907	0.587951	0.999823
g__Carboxylicivirga;s__Carboxylicivirga linearis	-0.681898	0.68455	0.319189	0.902969
g__Proteiniclasticum;s__Proteiniclasticum sp. QWL-01	-0.68187	0.782526	0.383551	0.903855
g__Butyrivibrio;s__Butyrivibrio sp. M55	0.68157	0.680891	0.316828	0.902969
g__Neisseria;s__Neisseria meningitidis	-0.681516	0.518914	0.189065	0.902969
g__Enorma;s__[Collinsella] massiliensis	-0.681316	1.57811	0.665939	0.999823
g__Collinsella;s__Collinsella sp. TF07-1	-0.681214	0.603538	0.259024	0.902969
g__Blautia;s__Blautia sp. CAG:37	-0.681079	1.4509	0.638772	0.999823
g__Faecalicatena;s__Faecalicatena sp.	0.680968	0.45751	0.13664	0.902969
g__Agathobaculum;s__Agathobaculum massiliense	0.68088	0.443523	0.124744	0.902969
g__Blautia;s__Blautia sp. NSJ-166	-0.680856	1.37449	0.620352	0.999823
g__Atopobacter;s__Atopobacter sp. AH10	-0.680231	0.954837	0.476213	0.963425
[truncated: 8,620 more rows]
