# Supplementary material
Source: Research Square preprint supplement (doi:10.21203/rs.3.rs-9632664/v1)
Supplement: Supplementary file 5 [file e09430015007028da2a4b884.xlsx]

## Sheet: Sheet1
Pvalue	8,11,14-Eicosatrienoylethanolamide	Prednisolone	1,1-Diethoxy-2-methylpropane	(+)-12-(2-Cyclopenten-1-yl)-2-dodecanone	Pentane-1,5-diamine	Menaquinone-4	N-Stearoyl Lysine	2,4-Dimethyl-5-propylthiazole	9(S)-HODE	Bacteriochlorophyllide b	MG(0:0/14:1(9Z)/0:0)	Withanolide B	5-methoxy-L-tryptophan	Capillanol	Ginkgolic Acid (C13:0)	13Z,16Z,19Z,22Z,25Z-octacosapentaenoic acid	Daucosterol	Diglyceryl monooleate	Sinulaflexiolide H	Lupinine	Palutropone	Wilforlide A	N-Cyclohexylformamide	Ionene	Pseudostellarin A	21-Hydroxypregnenolone	Bisdihydrotrifarin	Alternarienonic acid	Ketobemidone	Caudoxirene	Anthrarobin	(-)-Pelletierine	11beta-Hydroxyandrosterone	o-Hibiscanone	Isocurcumenol	Spongianolide B	Drofenine	(-)-Tochuinyl acetate	Hongdoushan A	Dehydrofalcarinol	MG(20:2(11Z,14Z)/0:0/0:0)	N-Linoleoyl Leucine	3-methylthiopropyl-desulfoglucosinolate	2,2,5,7,8-Pentamethyl-6-Chromanol	DTrE	Punctaporonin C	alpha-Linolenic acid	Germacrone	2'-epi-Nassauvirevolutin C
8,11,14-Eicosatrienoylethanolamide	0	0.366929	0.10833	0.0230285	0.0604428	1.10484e-06	0.179729	0.26358	0.00226967	0.878355	0.000671937	0.918049	0.890767	0.136293	0.0144022	0.0151764	0.616443	0.84258	0.445596	0.153997	0.0867777	0.0220633	0.113345	0.129305	0.447474	0.180634	0.956172	0.178037	0.0677079	0.0875454	0.164176	0.10613	0.0794611	0.318646	0.193932	0.0127809	0.0314988	0.224918	0.955572	0.189777	0.490265	0.0383018	0.165235	0.173294	0.789467	0.0473626	0.0078733	0.153646	0.207369
Prednisolone	0.366929	0	0.765719	0.0685745	0.718713	0.0729581	0.234741	0.948876	0.0774491	0.0807348	0.282922	0.961201	0.241874	0.328595	0.198391	0.222433	0.0305344	0.137173	0.977273	0.750083	0.835733	0.149949	0.820025	0.465978	0.272409	0.70952	0.617495	0.201722	0.595938	0.521689	0.127504	0.843624	0.566864	0.164117	0.691131	0.58211	0.334099	0.776102	0.538852	0.997	0.291537	0.305359	0.0916551	0.790272	0.983946	0.982195	0.197807	0.57591	0.317939
1,1-Diethoxy-2-methylpropane	0.10833	0.765719	0	0.187752	4.09727e-08	0.30135	0.0529019	0.437325	0.340234	0.231577	0.157559	0.00726511	0.32875	0.245805	0.286595	0.0436534	0.462405	0.176326	0.0930669	2.00491e-07	1.28151e-06	0.0910216	6.22014e-22	0.452513	0.233915	0.0238381	0.0689904	0.143675	0.480554	0.448925	0.167242	8.09302e-15	0.948774	0.000218711	0.0960662	0.0278099	0.400514	0.0769716	0.375157	0.0805451	0.199911	0.276848	0.117978	0.0973611	0.0193722	0.683995	0.479306	0.541956	0.228893
(+)-12-(2-Cyclopenten-1-yl)-2-dodecanone	0.0230285	0.0685745	0.187752	0	0.138803	0.0065048	0.0553984	0.771221	9.66344e-15	0.498973	0.00220001	0.420827	0.445538	0.154576	3.53236e-05	0.981206	0.029308	0.000176853	4.6211e-07	0.228336	0.159111	0.582316	0.198764	0.106894	0.588289	0.198196	0.0537154	0.733956	0.97147	0.205623	0.400038	0.189298	0.0711438	0.194211	0.267949	0.581291	0.00467692	0.238018	0.372481	0.180418	0.931896	0.951637	0.0993728	0.233364	0.560282	0.232308	8.29536e-07	0.0709189	1.01867e-07
Pentane-1,5-diamine	0.0604428	0.718713	4.09727e-08	0.138803	0	0.035348	0.0500668	0.587621	0.0881268	0.258233	0.100922	0.0998864	0.251854	0.0181221	0.0972251	0.0610458	0.810448	0.20284	0.0374213	0.000913466	1.10406e-12	0.121599	1.90265e-08	0.0380017	0.337118	0.000965887	0.0371652	0.0745496	0.561167	0.024896	0.0780416	3.18151e-07	0.0907035	8.05827e-06	0.0035647	0.000288882	0.279966	0.00438539	0.339358	0.0026268	0.150191	0.267418	0.188035	0.00591868	0.0283038	0.961088	0.329939	0.0355749	0.0486625
Menaquinone-4	1.10484e-06	0.0729581	0.30135	0.0065048	0.035348	0	0.00758257	0.815014	0.000106037	0.223778	0.00245965	0.48936	0.304	0.0547251	6.84401e-05	0.0642944	0.455598	0.119464	0.233315	0.512642	0.0483072	0.0417959	0.440519	0.0287779	0.971775	0.103052	0.283357	0.369989	0.708161	0.0234253	0.000106213	0.421594	0.0194112	0.0429882	0.107438	0.0201884	0.0351	0.0811736	0.247087	0.0892659	0.273227	0.234839	0.0473516	0.09335	0.0315525	0.1314	0.00120715	0.0260085	0.0495512
N-Stearoyl Lysine	0.179729	0.234741	0.0529019	0.0553984	0.0500668	0.00758257	0	0.800688	0.0335351	0.0020522	0.143964	0.539243	0.614937	0.0383572	0.106394	0.0105676	0.142357	0.402426	0.0241287	0.299177	0.0919981	0.0148169	0.152675	0.01582	0.630305	0.204105	0.0681454	0.346792	0.788438	0.0171785	0.113265	0.198729	0.00888152	0.081465	0.153563	0.012006	0.370736	0.12821	0.696102	0.151096	0.0297276	0.97851	0.0510265	0.170222	0.00169149	0.685784	0.0725771	0.0151025	0.026973
2,4-Dimethyl-5-propylthiazole	0.26358	0.948876	0.437325	0.771221	0.587621	0.815014	0.800688	0	0.528922	0.395661	0.907457	0.661606	0.671806	0.490862	0.915735	0.00606672	0.726731	0.545858	0.974992	0.591423	0.611425	0.0673757	0.459244	0.409189	0.593062	0.826192	0.809947	0.872361	1.60509e-08	0.78827	0.602135	0.354892	0.176657	0.766937	0.793766	0.470226	0.970007	0.773421	0.832184	0.762844	0.827135	0.957142	0.386333	0.823909	0.782287	0.221987	0.99167	0.479983	0.555993
9(S)-HODE	0.00226967	0.0774491	0.340234	9.66344e-15	0.0881268	0.000106037	0.0335351	0.528922	0	0.445959	0.000150771	0.594411	0.369558	0.117656	1.09355e-07	0.684307	0.0868378	0.000230547	6.2937e-05	0.281512	0.107195	0.510322	0.308158	0.113279	0.980258	0.121257	0.0684058	0.418237	0.974948	0.141026	0.191897	0.296253	0.0559522	0.0927307	0.177031	0.172739	0.000645229	0.14264	0.499306	0.108876	0.592251	0.665883	0.00782693	0.143021	0.887572	0.125074	1.67495e-07	0.0745379	3.24213e-07
Bacteriochlorophyllide b	0.878355	0.0807348	0.231577	0.498973	0.258233	0.223778	0.0020522	0.395661	0.445959	0	0.053105	0.685896	0.782925	0.811564	0.255633	0.388322	0.153333	0.760269	0.872522	0.532908	0.196928	0.111685	0.305833	0.577086	0.882881	0.823461	0.486056	0.872476	0.313904	0.696463	0.845763	0.232064	0.549315	0.100472	0.640984	0.594352	0.0181977	0.780644	0.179001	0.776246	0.376356	0.729623	0.748673	0.726095	0.0152379	0.531772	0.891655	0.625201	0.982007
MG(0:0/14:1(9Z)/0:0)	0.000671937	0.282922	0.157559	0.00220001	0.100922	0.00245965	0.143964	0.907457	0.000150771	0.053105	0	0.433651	0.947678	0.147192	0.00039981	0.0353566	0.225632	0.675065	0.0618183	0.285073	0.0951029	0.0112562	0.126908	0.194353	0.842238	0.266313	0.447443	0.32251	0.361688	0.170876	0.442109	0.098344	0.0901286	0.0455637	0.336704	0.0127298	1.70172e-13	0.289403	0.757229	0.23505	0.424059	0.367128	0.136898	0.245136	0.979436	0.147151	0.000745727	0.202562	0.288947
Withanolide B	0.918049	0.961201	0.00726511	0.420827	0.0998864	0.48936	0.539243	0.661606	0.594411	0.685896	0.433651	0	0.411156	0.183187	0.22216	0.734821	0.731927	0.107083	0.307953	0.0079446	0.178655	0.717197	0.020497	0.121522	0.310734	0.286155	0.209498	0.912977	0.630019	0.221403	0.47373	0.172099	0.206665	0.483849	0.264684	0.483401	0.91438	0.226711	0.16644	0.23291	0.192371	0.373801	0.291711	0.272384	0.469143	0.925443	0.181056	0.126404	0.460275
5-methoxy-L-tryptophan	0.890767	0.241874	0.32875	0.445538	0.251854	0.304	0.614937	0.671806	0.369558	0.782925	0.947678	0.411156	0	0.633151	0.732058	0.969856	0.554497	0.416861	0.605678	0.673776	0.442085	0.692708	0.314824	0.809672	0.0316768	0.406231	0.781931	0.960845	0.842362	0.619424	1.29594e-05	0.315366	0.975694	0.388805	0.448438	0.785298	0.804875	0.445917	3.59964e-08	0.413561	0.971408	0.187291	0.940955	0.441876	0.00232938	0.995808	0.513699	0.961618	0.632206
Capillanol	0.136293	0.328595	0.245805	0.154576	0.0181221	0.0547251	0.0383572	0.490862	0.117656	0.811564	0.147192	0.183187	0.633151	0	0.121133	0.0671395	0.410419	0.323706	0.0307077	0.0188339	0.00372863	0.0976538	0.34184	7.68828e-19	0.0998204	9.036e-15	0.023163	0.0109789	0.497285	3.60279e-20	0.37466	0.125393	2.20773e-11	0.249622	1.147e-21	0.00440537	0.664706	1.38886e-18	0.212098	4.4305e-17	0.014736	0.507539	0.191098	6.69929e-20	0.234334	0.498175	0.355053	4.97844e-18	0.136438
Ginkgolic Acid (C13:0)	0.0144022	0.198391	0.286595	3.53236e-05	0.0972251	6.84401e-05	0.106394	0.915735	1.09355e-07	0.255633	0.00039981	0.22216	0.732058	0.121133	0	0.390805	0.0733955	0.00232675	0.0247732	0.347264	0.225386	0.702468	0.380803	0.0461669	0.62482	0.218298	0.118508	0.3386	0.216289	0.060068	0.00117594	0.378424	0.0105505	0.171208	0.245472	0.0705672	0.00253634	0.180817	0.435253	0.163602	0.220386	0.075947	0.0133357	0.169112	0.278403	0.229459	2.60029e-05	0.0425396	0.00164135
13Z,16Z,19Z,22Z,25Z-octacosapentaenoic acid	0.0151764	0.222433	0.0436534	0.981206	0.0610458	0.0642944	0.0105676	0.00606672	0.684307	0.388322	0.0353566	0.734821	0.969856	0.0671395	0.390805	0	0.180477	0.884465	0.791446	0.890193	0.0526803	5.05193e-15	0.0950338	0.0338825	0.395572	0.247839	0.0796521	0.315401	3.01747e-06	0.0186241	0.0604585	0.065249	0.0303419	0.0545404	0.122268	0.00822859	0.146079	0.155129	0.745796	0.269687	0.157203	0.278197	0.00498477	0.199382	0.0770734	0.617713	0.988725	0.0620987	0.532091
Daucosterol	0.616443	0.0305344	0.462405	0.029308	0.810448	0.455598	0.142357	0.726731	0.0868378	0.153333	0.225632	0.731927	0.554497	0.410419	0.0733955	0.180477	0	0.00258352	0.217948	0.975819	0.962034	0.47355	0.693477	0.480651	0.729276	0.319433	0.331692	0.767173	0.150298	0.493207	0.13	0.44075	0.607233	0.409855	0.296805	0.54381	0.224096	0.240205	0.717522	0.146815	0.588762	0.0443144	0.113073	0.297642	0.749363	0.641095	0.64313	0.399832	0.00850473
Diglyceryl monooleate	0.84258	0.137173	0.176326	0.000176853	0.20284	0.119464	0.402426	0.545858	0.000230547	0.760269	0.675065	0.107083	0.416861	0.323706	0.00232675	0.884465	0.00258352	0	0.0199892	0.144095	0.21504	0.566861	0.269408	0.352792	0.991983	0.195879	0.562084	0.40801	0.783834	0.476101	0.522525	0.319762	0.53595	0.325505	0.312361	0.962571	0.996864	0.336783	0.518991	0.426072	0.496363	0.788784	0.00338904	0.337839	0.659352	0.356292	0.0312843	0.29377	1.18406e-05
Sinulaflexiolide H	0.445596	0.977273	0.0930669	4.6211e-07	0.0374213	0.233315	0.0241287	0.974992	6.2937e-05	0.872522	0.0618183	0.307953	0.605678	0.0307077	0.0247732	0.791446	0.217948	0.0199892	0	0.0827098	0.0635276	0.734464	0.0853992	0.0371236	0.808308	0.0343445	0.0826011	0.210887	0.562699	0.0643876	0.525373	0.0589641	0.0532795	0.208605	0.0492948	0.213028	0.33557	0.0535611	0.428459	0.0378768	0.976924	0.78721	0.0741801	0.0515282	0.898806	0.398074	0.00259778	0.0316788	9.72622e-10
Lupinine	0.153997	0.750083	2.00491e-07	0.228336	0.000913466	0.512642	0.299177	0.591423	0.281512	0.532908	0.285073	0.0079446	0.673776	0.0188339	0.347264	0.890193	0.975819	0.144095	0.0827098	0	0.00712874	0.669738	1.88071e-07	0.117682	0.291755	0.00121599	0.0515015	0.0328626	0.349296	0.12074	0.596819	3.90994e-08	0.600038	0.178156	0.00767506	0.110385	0.90175	0.010127	0.442758	0.0125926	0.482279	0.277569	0.337967	0.00762436	0.0825218	0.668993	0.706726	0.152333	0.140793
Palutropone	0.0867777	0.835733	1.28151e-06	0.159111	1.10406e-12	0.0483072	0.0919981	0.611425	0.107195	0.196928	0.0951029	0.178655	0.442085	0.00372863	0.225386	0.0526803	0.962034	0.21504	0.0635276	0.00712874	0	0.156895	1.37665e-05	0.0331773	0.440926	2.96997e-05	0.0902078	0.184642	0.784722	0.0140079	0.259298	4.21064e-06	0.127155	8.02677e-05	0.000199918	0.0196946	0.440324	0.00019636	0.444025	0.000200871	0.160518	0.463798	0.231448	0.000401108	0.0583798	0.666159	0.843676	0.0245581	0.153487
Wilforlide A	0.0220633	0.149949	0.0910216	0.582316	0.121599	0.0417959	0.0148169	0.0673757	0.510322	0.111685	0.0112562	0.717197	0.692708	0.0976538	0.702468	5.05193e-15	0.47355	0.566861	0.734464	0.669738	0.156895	0	0.130677	0.044671	0.029798	0.426936	0.0162453	0.390541	0.0019877	0.0355049	0.345515	0.0818836	0.0517766	0.104085	0.215605	0.00883992	0.0171761	0.285495	0.950155	0.315127	0.334106	0.773023	0.0368557	0.296798	0.136178	0.166929	0.734281	0.067217	0.661447
N-Cyclohexylformamide	0.113345	0.820025	6.22014e-22	0.198764	1.90265e-08	0.440519	0.152675	0.459244	0.308158	0.305833	0.126908	0.020497	0.314824	0.34184	0.380803	0.0950338	0.693477	0.269408	0.0853992	1.88071e-07	1.37665e-05	0.130677	0	0.564087	0.263458	0.0500917	0.0767148	0.103664	0.494271	0.590754	0.294007	3.07931e-15	0.999971	0.000496711	0.164304	0.0267282	0.300222	0.152424	0.365767	0.110169	0.275182	0.329166	0.148396	0.179521	0.0441476	0.671121	0.573762	0.655215	0.161853
Ionene	0.129305	0.465978	0.452513	0.106894	0.0380017	0.0287779	0.01582	0.409189	0.113279	0.577086	0.194353	0.121522	0.809672	7.68828e-19	0.0461669	0.0338825	0.480651	0.352792	0.0371236	0.117682	0.0331773	0.044671	0.564087	0	0.153724	4.60331e-08	0.00901378	0.100593	0.253225	1.14465e-25	0.293607	0.473214	6.1242e-21	0.507809	1.63238e-12	0.00622223	0.774337	2.57505e-11	0.339922	3.68431e-11	0.00707886	0.377405	0.214904	1.64645e-11	0.247242	0.452634	0.163612	3.36496e-36	0.0776029
Pseudostellarin A	0.447474	0.272409	0.233915	0.588289	0.337118	0.971775	0.630305	0.593062	0.980258	0.882881	0.842238	0.310734	0.0316768	0.0998204	0.62482	0.395572	0.729276	0.991983	0.808308	0.291755	0.440926	0.029798	0.263458	0.153724	0	0.116199	1.57236e-05	0.914952	0.723444	0.111597	0.531346	0.243608	0.397829	0.34754	0.0523778	0.67226	0.485224	0.0632558	0.0355249	0.0508138	0.901811	0.905682	0.681841	0.0568085	0.162438	0.613425	0.665621	0.166203	0.792424
21-Hydroxypregnenolone	0.180634	0.70952	0.0238381	0.198196	0.000965887	0.103052	0.204105	0.826192	0.121257	0.823461	0.266313	0.286155	0.406231	9.036e-15	0.218298	0.247839	0.319433	0.195879	0.0343445	0.00121599	2.96997e-05	0.426936	0.0500917	4.60331e-08	0.116199	0	0.067828	0.00913983	0.955441	1.03571e-09	0.353723	0.00758537	0.000121468	0.0366465	6.63191e-24	0.00319351	0.627059	1.58552e-24	0.121139	6.5488e-21	0.0484009	0.72784	0.292659	1.72522e-26	0.219971	0.565351	0.807566	5.58378e-08	0.181501
Bisdihydrotrifarin	0.956172	0.617495	0.0689904	0.0537154	0.0371652	0.283357	0.0681454	0.809947	0.0684058	0.486056	0.447443	0.209498	0.781931	0.023163	0.118508	0.0796521	0.331692	0.562084	0.0826011	0.0515015	0.0902078	0.0162453	0.0767148	0.00901378	1.57236e-05	0.067828	0	0.447394	0.735085	0.0063908	0.0706017	0.0782468	0.013993	0.146254	0.0220102	0.175752	0.25939	0.0237803	0.540271	0.027233	0.733757	0.381721	0.261735	0.0300259	0.0208044	0.452504	0.715983	0.00792885	0.0105012
Alternarienonic acid	0.178037	0.201722	0.143675	0.733956	0.0745496	0.369989	0.346792	0.872361	0.418237	0.872476	0.32251	0.912977	0.960845	0.0109789	0.3386	0.315401	0.767173	0.40801	0.210887	0.0328626	0.184642	0.390541	0.103664	0.100593	0.914952	0.00913983	0.447394	0	0.413011	0.0933583	0.924381	0.00749486	0.292944	0.0376616	0.0109024	0.0566527	0.52098	0.0147878	0.89036	0.0254642	0.152943	0.454123	0.283069	0.0129691	0.565504	0.878709	0.567585	0.122709	0.68816
Ketobemidone	0.0677079	0.595938	0.480554	0.97147	0.561167	0.708161	0.788438	1.60509e-08	0.974948	0.313904	0.361688	0.630019	0.842362	0.497285	0.216289	3.01747e-06	0.150298	0.783834	0.562699	0.349296	0.784722	0.0019877	0.494271	0.253225	0.723444	0.955441	0.735085	0.413011	0	0.358288	0.158469	0.472588	0.103376	0.52451	0.693937	0.340741	0.694721	0.738943	0.980657	0.85072	0.672624	0.0730993	0.0742661	0.767964	0.815575	0.264388	0.779921	0.411512	0.317993
Caudoxirene	0.0875454	0.521689	0.448925	0.205623	0.024896	0.0234253	0.0171785	0.78827	0.141026	0.696463	0.170876	0.221403	0.619424	3.60279e-20	0.060068	0.0186241	0.493207	0.476101	0.0643876	0.12074	0.0140079	0.0355049	0.590754	1.14465e-25	0.111597	1.03571e-09	0.0063908	0.0933583	0.358288	0	0.229205	0.466781	4.44703e-16	0.352863	6.05377e-15	0.00220115	0.823443	2.07267e-13	0.203196	1.06005e-12	0.00574456	0.274536	0.251335	7.54122e-14	0.149017	0.548056	0.43899	1.08829e-23	0.139199
Anthrarobin	0.164176	0.127504	0.167242	0.400038	0.0780416	0.000106213	0.113265	0.602135	0.191897	0.845763	0.442109	0.47373	1.29594e-05	0.37466	0.00117594	0.0604585	0.13	0.522525	0.525373	0.596819	0.259298	0.345515	0.294007	0.293607	0.531346	0.353723	0.0706017	0.924381	0.158469	0.229205	0	0.276553	0.233412	0.0277135	0.398166	0.174581	0.795426	0.306264	0.00331273	0.508436	0.813974	0.0745947	0.0294039	0.431221	4.18639e-05	0.998064	0.16206	0.376403	0.168333
(-)-Pelletierine	0.10613	0.843624	8.09302e-15	0.189298	3.18151e-07	0.421594	0.198729	0.354892	0.296253	0.232064	0.098344	0.172099	0.315366	0.125393	0.378424	0.065249	0.44075	0.319762	0.0589641	3.90994e-08	4.21064e-06	0.0818836	3.07931e-15	0.473214	0.243608	0.00758537	0.0782468	0.00749486	0.472588	0.466781	0.276553	0	0.912811	0.000629173	0.0465859	0.0132209	0.352849	0.0558691	0.498053	0.0393678	0.274161	0.309702	0.207863	0.0469833	0.0567711	0.616838	0.690669	0.558035	0.176021
11beta-Hydroxyandrosterone	0.0794611	0.566864	0.948774	0.0711438	0.0907035	0.0194112	0.00888152	0.176657	0.0559522	0.549315	0.0901286	0.206665	0.975694	2.20773e-11	0.0105505	0.0303419	0.607233	0.53595	0.0532795	0.600038	0.127155	0.0517766	0.999971	6.1242e-21	0.397829	0.000121468	0.013993	0.292944	0.103376	4.44703e-16	0.233412	0.912811	0	0.804455	3.06458e-07	0.00449608	0.73061	9.50702e-07	0.491231	6.19829e-07	0.0168023	0.353424	0.177227	7.58413e-07	0.257315	0.43314	0.0634826	1.26122e-21	0.060357
o-Hibiscanone	0.318646	0.164117	0.000218711	0.194211	8.05827e-06	0.0429882	0.081465	0.766937	0.0927307	0.100472	0.0455637	0.483849	0.388805	0.249622	0.171208	0.0545404	0.409855	0.325505	0.208605	0.178156	8.02677e-05	0.104085	0.000496711	0.507809	0.34754	0.0366465	0.146254	0.0376616	0.52451	0.352863	0.0277135	0.000629173	0.804455	0	0.107577	0.108011	0.141854	0.04167	0.846026	0.118461	0.183693	0.397058	0.225954	0.121845	0.336034	0.628776	0.288898	0.58953	0.371793
Isocurcumenol	0.193932	0.691131	0.0960662	0.267949	0.0035647	0.107438	0.153563	0.793766	0.177031	0.640984	0.336704	0.264684	0.448438	1.147e-21	0.245472	0.122268	0.296805	0.312361	0.0492948	0.00767506	0.000199918	0.215605	0.164304	1.63238e-12	0.0523778	6.63191e-24	0.0220102	0.0109024	0.693937	6.05377e-15	0.398166	0.0465859	3.06458e-07	0.107577	0	0.00630634	0.448765	1.41634e-31	0.144367	1.62601e-23	0.0294317	0.513817	0.311271	4.06451e-34	0.185547	0.654206	0.796431	2.57397e-12	0.206356
Spongianolide B	0.0127809	0.58211	0.0278099	0.581291	0.000288882	0.0201884	0.012006	0.470226	0.172739	0.594352	0.0127298	0.483401	0.785298	0.00440537	0.0705672	0.00822859	0.54381	0.962571	0.213028	0.110385	0.0196946	0.00883992	0.0267282	0.00622223	0.67226	0.00319351	0.175752	0.0566527	0.340741	0.00220115	0.174581	0.0132209	0.00449608	0.108011	0.00630634	0	0.0260654	0.0106946	0.617688	0.00276692	0.0662508	0.274132	0.0882142	0.00295077	0.0711744	0.165773	0.144724	0.00744963	0.476889
Drofenine	0.0314988	0.334099	0.400514	0.00467692	0.279966	0.0351	0.370736	0.970007	0.000645229	0.0181977	1.70172e-13	0.91438	0.804875	0.664706	0.00253634	0.146079	0.224096	0.996864	0.33557	0.90175	0.440324	0.0171761	0.300222	0.774337	0.485224	0.627059	0.25939	0.52098	0.694721	0.823443	0.795426	0.352849	0.73061	0.141854	0.448765	0.0260654	0	0.524775	0.958943	0.815127	0.753479	0.854566	0.513556	0.660481	0.796947	0.0637408	0.00360807	0.829474	0.5175
(-)-Tochuinyl acetate	0.224918	0.776102	0.0769716	0.238018	0.00438539	0.0811736	0.12821	0.773421	0.14264	0.780644	0.289403	0.226711	0.445917	1.38886e-18	0.180817	0.155129	0.240205	0.336783	0.0535611	0.010127	0.00019636	0.285495	0.152424	2.57505e-11	0.0632558	1.58552e-24	0.0237803	0.0147878	0.738943	2.07267e-13	0.306264	0.0558691	9.50702e-07	0.04167	1.41634e-31	0.0106946	0.524775	0	0.120577	1.69671e-23	0.0385115	0.561872	0.302506	9.65884e-32	0.156869	0.623159	0.746071	3.36929e-11	0.23704
Hongdoushan A	0.955572	0.538852	0.375157	0.372481	0.339358	0.247087	0.696102	0.832184	0.499306	0.179001	0.757229	0.16644	3.59964e-08	0.212098	0.435253	0.745796	0.717522	0.518991	0.428459	0.442758	0.444025	0.950155	0.365767	0.339922	0.0355249	0.121139	0.540271	0.89036	0.980657	0.203196	0.00331273	0.498053	0.491231	0.846026	0.144367	0.617688	0.958943	0.120577	0	0.092133	0.670047	0.864211	0.352992	0.109727	0.000553508	0.424007	0.40309	0.39539	0.614375
Dehydrofalcarinol	0.189777	0.997	0.0805451	0.180418	0.0026268	0.0892659	0.151096	0.762844	0.108876	0.776246	0.23505	0.23291	0.413561	4.4305e-17	0.163602	0.269687	0.146815	0.426072	0.0378768	0.0125926	0.000200871	0.315127	0.110169	3.68431e-11	0.0508138	6.5488e-21	0.027233	0.0254642	0.85072	1.06005e-12	0.508436	0.0393678	6.19829e-07	0.118461	1.62601e-23	0.00276692	0.815127	1.69671e-23	0.092133	0	0.0399313	0.721292	0.552225	3.13022e-26	0.188256	0.196224	0.613212	3.73182e-11	0.19582
MG(20:2(11Z,14Z)/0:0/0:0)	0.490265	0.291537	0.199911	0.931896	0.150191	0.273227	0.0297276	0.827135	0.592251	0.376356	0.424059	0.192371	0.971408	0.014736	0.220386	0.157203	0.588762	0.496363	0.976924	0.482279	0.160518	0.334106	0.275182	0.00707886	0.901811	0.0484009	0.733757	0.152943	0.672624	0.00574456	0.813974	0.274161	0.0168023	0.183693	0.0294317	0.0662508	0.753479	0.0385115	0.670047	0.0399313	0	0.414102	0.81103	0.0313863	0.720503	0.727322	0.353338	0.0101827	0.635623
N-Linoleoyl Leucine	0.0383018	0.305359	0.276848	0.951637	0.267418	0.234839	0.97851	0.957142	0.665883	0.729623	0.367128	0.373801	0.187291	0.507539	0.075947	0.278197	0.0443144	0.788784	0.78721	0.277569	0.463798	0.773023	0.329166	0.377405	0.905682	0.72784	0.381721	0.454123	0.0730993	0.274536	0.0745947	0.309702	0.353424	0.397058	0.513817	0.274132	0.854566	0.561872	0.864211	0.721292	0.414102	0	0.918489	0.516108	0.524581	0.622172	0.740594	0.634517	0.743477
3-methylthiopropyl-desulfoglucosinolate	0.165235	0.0916551	0.117978	0.0993728	0.188035	0.0473516	0.0510265	0.386333	0.00782693	0.748673	0.136898	0.291711	0.940955	0.191098	0.0133357	0.00498477	0.113073	0.00338904	0.0741801	0.337967	0.231448	0.0368557	0.148396	0.214904	0.681841	0.292659	0.261735	0.283069	0.0742661	0.251335	0.0294039	0.207863	0.177227	0.225954	0.311271	0.0882142	0.513556	0.302506	0.352992	0.552225	0.81103	0.918489	0	0.359248	0.326857	0.629544	0.0356289	0.254051	0.00165007
2,2,5,7,8-Pentamethyl-6-Chromanol	0.173294	0.790272	0.0973611	0.233364	0.00591868	0.09335	0.170222	0.823909	0.143021	0.726095	0.245136	0.272384	0.441876	6.69929e-20	0.169112	0.199382	0.297642	0.337839	0.0515282	0.00762436	0.000401108	0.296798	0.179521	1.64645e-11	0.0568085	1.72522e-26	0.0300259	0.0129691	0.767964	7.54122e-14	0.431221	0.0469833	7.58413e-07	0.121845	4.06451e-34	0.00295077	0.660481	9.65884e-32	0.109727	3.13022e-26	0.0313863	0.516108	0.359248	0	0.213715	0.411385	0.709764	2.30103e-11	0.239773
DTrE	0.789467	0.983946	0.0193722	0.560282	0.0283038	0.0315525	0.00169149	0.782287	0.887572	0.0152379	0.979436	0.469143	0.00232938	0.234334	0.278403	0.0770734	0.749363	0.659352	0.898806	0.0825218	0.0583798	0.136178	0.0441476	0.247242	0.162438	0.219971	0.0208044	0.565504	0.815575	0.149017	4.18639e-05	0.0567711	0.257315	0.336034	0.185547	0.0711744	0.796947	0.156869	0.000553508	0.188256	0.720503	0.524581	0.326857	0.213715	0	0.664803	0.267295	0.221153	0.784258
Punctaporonin C	0.0473626	0.982195	0.683995	0.232308	0.961088	0.1314	0.685784	0.221987	0.125074	0.531772	0.147151	0.925443	0.995808	0.498175	0.229459	0.617713	0.641095	0.356292	0.398074	0.668993	0.666159	0.166929	0.671121	0.452634	0.613425	0.565351	0.452504	0.878709	0.264388	0.548056	0.998064	0.616838	0.43314	0.628776	0.654206	0.165773	0.0637408	0.623159	0.424007	0.196224	0.727322	0.622172	0.629544	0.411385	0.664803	0	0.0959752	0.537642	0.31978
alpha-Linolenic acid	0.0078733	0.197807	0.479306	8.29536e-07	0.329939	0.00120715	0.0725771	0.99167	1.67495e-07	0.891655	0.000745727	0.181056	0.513699	0.355053	2.60029e-05	0.988725	0.64313	0.0312843	0.00259778	0.706726	0.843676	0.734281	0.573762	0.163612	0.665621	0.807566	0.715983	0.567585	0.779921	0.43899	0.16206	0.690669	0.0634826	0.288898	0.796431	0.144724	0.00360807	0.746071	0.40309	0.613212	0.353338	0.740594	0.0356289	0.709764	0.267295	0.0959752	0	0.165333	0.00773353
Germacrone	0.153646	0.57591	0.541956	0.0709189	0.0355749	0.0260085	0.0151025	0.479983	0.0745379	0.625201	0.202562	0.126404	0.961618	4.97844e-18	0.0425396	0.0620987	0.399832	0.29377	0.0316788	0.152333	0.0245581	0.067217	0.655215	3.36496e-36	0.166203	5.58378e-08	0.00792885	0.122709	0.411512	1.08829e-23	0.376403	0.558035	1.26122e-21	0.58953	2.57397e-12	0.00744963	0.829474	3.36929e-11	0.39539	3.73182e-11	0.0101827	0.634517	0.254051	2.30103e-11	0.221153	0.537642	0.165333	0	0.0622167
2'-epi-Nassauvirevolutin C	0.207369	0.317939	0.228893	1.01867e-07	0.0486625	0.0495512	0.026973	0.555993	3.24213e-07	0.982007	0.288947	0.460275	0.632206	0.136438	0.00164135	0.532091	0.00850473	1.18406e-05	9.72622e-10	0.140793	0.153487	0.661447	0.161853	0.0776029	0.792424	0.181501	0.0105012	0.68816	0.317993	0.139199	0.168333	0.176021	0.060357	0.371793	0.206356	0.476889	0.5175	0.23704	0.614375	0.19582	0.635623	0.743477	0.00165007	0.239773	0.784258	0.31978	0.00773353	0.0622167	0
2,3-bis(hydroxymethyl)-7-hydroxy-6-methoxy-1-tetralone	0.870492	0.202094	0.0926575	0.468212	0.576959	0.651638	0.671341	0.835773	0.461165	0.272451	0.119923	0.929969	0.845047	0.680112	0.513682	0.778466	0.907355	0.280231	0.830277	0.0269582	0.588552	0.249975	0.138483	0.966073	0.164886	0.184097	0.428512	0.515686	0.526514	0.92425	0.877447	0.0732574	0.484569	0.0951148	0.496625	0.378465	0.0454073	0.365695	0.49971	0.376852	0.652668	0.88968	0.936867	0.333082	0.5484	0.572623	0.473357	0.910078	0.971971
Longithorol C	0.910811	0.133923	0.163711	0.635871	0.141963	0.449184	0.361226	0.474964	0.591743	1.22119e-08	0.456655	0.382111	0.556458	0.882161	0.232057	0.738944	0.237148	0.0261706	0.89899	0.120116	0.151297	0.949758	0.206034	0.602428	0.886237	0.430046	0.592558	0.278877	0.517837	0.747206	0.575014	0.142567	0.303638	0.141616	0.765978	0.821354	0.530687	0.692162	0.321144	0.672255	0.365425	0.711665	0.858789	0.64992	0.560797	0.507464	0.918165	0.5853	0.899209
Cycloschkuhriadiol acetate	0.200052	0.287326	0.179612	2.63808e-06	0.0382627	0.0213193	0.000744835	0.988747	4.8346e-06	0.792203	0.0949503	0.249798	0.643143	0.00568937	0.00397557	0.29387	0.0629407	0.000706494	8.61074e-08	0.134025	0.0677435	0.375905	0.14599	0.00225433	0.7976	0.0123769	0.014605	0.272379	0.497208	0.00436461	0.320338	0.132787	0.00348448	0.142171	0.0123741	0.187931	0.323555	0.0151483	0.335735	0.0133555	0.00477384	0.885426	0.0808062	0.0141635	0.979968	0.49648	0.00945744	0.00158511	3.82438e-09
Linoleylanilide	0.229273	0.965853	0.0461778	0.277821	0.0096536	0.54414	0.966205	0.368387	0.21889	0.273891	0.271368	0.257684	0.451931	4.04979e-09	0.172974	0.286005	0.446925	0.263122	0.035755	0.000577799	0.00536697	0.498021	0.0870643	8.63007e-06	0.120493	8.85212e-14	0.178838	0.000435119	0.279935	3.63965e-06	0.625763	0.00599756	0.00214107	0.101302	1.5245e-12	0.0224383	0.621668	3.30379e-12	0.20268	5.5323e-11	0.367511	0.620376	0.396014	4.52996e-13	0.716141	0.2931	0.701464	1.68114e-05	0.196796
Fuberidazole	0.330826	0.14058	0.478817	0.0355623	0.337765	0.167004	0.00351576	0.690362	0.0762223	0.0645627	0.4694	0.413955	0.871086	0.0951658	0.473898	0.196355	0.0625847	0.00342084	0.0753741	0.330705	0.190007	0.141682	0.678095	0.0655372	0.132499	0.190621	0.00325031	0.609221	0.50228	0.0853151	0.131626	0.729635	0.136375	0.200413	0.112635	0.495933	0.337544	0.100886	0.568361	0.162335	0.564343	0.731373	0.15554	0.222314	0.0117303	0.94112	0.956747	0.0539301	0.00242394
L-Lysine	0.269986	0.0744634	0.139323	0.642863	0.297531	0.919161	0.834897	0.566733	0.891992	0.125716	0.514016	0.148304	0.190239	0.267879	0.678041	0.699304	0.250156	0.0172905	0.397126	0.146702	0.210601	0.35727	0.196763	0.506879	0.000165358	0.195346	0.14569	0.79162	0.596058	0.579395	0.799453	0.23706	0.882458	0.271585	0.22073	0.382241	0.542172	0.205455	0.0215563	0.187517	0.247964	0.660041	0.529615	0.263939	0.0783749	0.879907	0.188477	0.499193	0.708792
Estradiol-17alpha	0.369273	0.842527	0.437819	0.165686	0.0663304	0.127811	0.0975593	0.698863	0.0886841	0.721709	0.289991	0.104244	0.546514	2.50565e-14	0.297107	0.446259	0.25617	0.303546	0.0401749	0.0757575	0.0102942	0.470689	0.700804	2.03581e-10	0.088933	1.55394e-14	0.057946	0.212915	0.963467	2.79883e-11	0.623655	0.483289	7.84099e-07	0.252107	4.51004e-16	0.0202043	0.813108	6.28204e-17	0.132097	3.42501e-17	0.0287803	0.769138	0.363521	1.16899e-17	0.490529	0.211699	0.332889	1.84908e-10	0.161958
Cafestol	0.120648	0.804005	0.496149	0.596074	0.0697388	0.146379	0.0597061	0.336291	0.422399	0.32803	0.474242	0.278808	0.611598	4.25925e-09	0.208764	0.207842	0.204136	0.523243	0.0654462	0.00507713	0.366539	0.21874	0.430602	7.6398e-10	0.761405	1.00843e-05	0.142407	0.0116811	0.390597	3.3349e-09	0.625588	0.327776	3.61448e-08	0.677755	6.23893e-07	0.000797444	0.340873	1.90165e-06	0.822653	1.55949e-06	0.0887997	0.4645	0.297312	8.91812e-07	0.443606	0.281316	0.587069	3.22736e-09	0.105227
Coetsanoic acid	0.373086	0.388949	0.619446	1.85905e-06	0.312489	0.123429	0.0753039	0.79755	1.1548e-05	0.998781	0.457695	0.46134	0.746214	0.171475	0.00376238	0.604789	0.0228099	0.000721541	2.14905e-07	0.307347	0.414705	0.586005	0.332726	0.119752	0.704554	0.216071	0.0227935	0.407053	0.744838	0.198277	0.377572	0.372805	0.100601	0.951965	0.221497	0.921122	0.648464	0.271135	0.629916	0.161036	0.531605	0.998601	0.134486	0.228107	0.948779	0.546444	0.0193993	0.0838414	3.13311e-11
Eprosartan	0.617165	0.445467	0.475007	0.332952	0.85538	0.859735	0.415866	0.92656	0.320786	0.735351	0.390059	0.699185	0.900886	0.671261	0.689567	0.949042	0.00554649	6.06204e-06	0.583498	0.921284	0.733419	0.702077	0.572446	0.571795	0.516993	0.811672	0.64484	0.749562	0.936541	0.590861	0.828671	0.676511	0.41627	0.323964	0.936333	0.710609	0.628221	0.957791	0.741236	0.949858	0.689842	0.379836	0.312413	0.957824	0.914194	0.612044	0.604349	0.571235	0.237538
Smardaesidin G	0.00642816	0.381983	0.22461	3.0405e-05	0.123822	0.000549245	0.0410256	0.914612	3.82306e-06	0.350563	0.00780621	0.906342	0.755267	0.415185	5.29842e-13	0.2691	0.0129261	0.00766875	0.027018	0.569511	0.256366	0.483887	0.359057	0.0950807	0.473444	0.561918	0.0807384	0.78579	0.258366	0.125698	0.00643511	0.459392	0.0216049	0.144623	0.529651	0.0829867	0.00863468	0.413621	0.770779	0.449212	0.429388	0.0163508	0.0354658	0.432718	0.252849	0.498786	0.00132089	0.0867038	0.000808406
Histamine	0.276197	0.101709	0.140837	0.726326	0.0181693	0.227669	0.29106	0.400832	0.481104	0.918657	0.509685	0.31355	0.703007	1.33359e-07	0.850368	0.118744	0.635097	0.280713	0.154246	0.00476676	0.000614428	0.302811	0.194538	0.000465364	0.414586	2.51441e-07	0.152175	0.00260404	0.675783	0.000135904	0.368744	0.0167343	0.016578	0.0775528	2.57698e-07	0.272142	0.136387	8.25755e-07	0.553278	6.2969e-06	0.335269	0.44111	0.215598	2.22071e-06	0.374176	0.837606	0.901088	0.000762424	0.248265
Bremazocine	0.590486	0.422806	0.801384	0.092023	0.795397	0.6611	0.39822	0.717006	0.0582434	0.166083	1.96947e-05	0.853133	0.689558	0.742203	0.225097	0.921928	0.950308	0.64582	0.904538	0.792176	0.761325	0.238727	0.480026	0.802657	0.0958856	0.728941	0.2696	0.525765	0.735014	0.719041	0.171347	0.517318	0.595996	0.246991	0.877869	0.329452	3.70849e-08	0.742382	0.994636	0.482813	0.845071	0.737362	0.58452	0.610342	0.400208	0.258279	0.349427	0.722635	0.658335
Anandamide (20:l, n-9)	0.727552	0.18012	0.91003	0.758553	0.708763	0.33588	0.0380132	0.344057	0.620132	0.161507	0.233316	0.660221	0.747169	0.846479	0.162915	0.434616	0.407529	0.325105	0.723081	0.212581	0.829656	0.595914	0.674404	0.694135	0.525875	0.308762	0.640028	0.322376	0.536023	0.697871	0.697332	0.680425	0.519172	0.567938	0.488079	0.855918	0.210445	0.523634	0.996164	0.526104	0.189089	0.62918	0.951646	0.500093	0.787639	0.766696	0.21485	0.655359	0.99664
hyocholic acid	0.126426	0.358791	0.490826	0.754149	0.722578	0.242859	0.576574	0.0115483	0.397405	0.582897	0.782759	0.363184	0.446044	0.261231	0.10718	0.0148137	0.898319	0.47725	0.638554	0.182827	0.598909	0.0209359	0.545361	0.0392012	0.439595	0.75544	0.200563	0.684295	0.000661929	0.0849219	0.736027	0.33044	0.00353198	0.214595	0.619783	0.324053	0.603052	0.751499	0.396503	0.594564	0.311926	0.583328	0.116338	0.68529	0.550268	0.232951	0.351304	0.0432097	0.789585
Ergosta-4,6,8(14),22-tetraen-3-one	0.14204	0.341458	0.385723	0.179091	0.117558	0.125484	0.039028	0.828261	0.0208259	0.0023224	0.000298244	0.900065	0.556091	0.471048	0.00174312	0.094956	0.306235	0.226323	0.595807	0.273885	0.0741096	0.239304	0.476174	0.789881	0.363768	0.371267	0.791959	0.271532	0.977079	0.517122	0.715705	0.31605	0.641924	0.259996	0.577125	0.180719	0.00183788	0.505412	0.278015	0.480532	0.961198	0.701133	0.377069	0.543628	0.281572	0.264205	0.449595	0.741493	0.33783
24(28)-Dehydroergosterol	0.000226511	0.605641	0.0240561	0.373701	0.0188026	0.0206033	0.000230722	0.578168	0.286391	0.265582	0.0467385	0.38615	0.648365	0.117615	0.930235	8.71053e-06	0.214289	0.729604	0.362562	0.0898134	0.0219472	7.74944e-06	0.0421999	0.0759586	0.598094	0.142625	0.182991	0.5238	0.352678	0.0362614	0.334262	0.0255829	0.125721	0.0283096	0.125309	0.00650999	0.185746	0.151346	0.629002	0.24867	0.257987	0.237158	0.222355	0.176303	0.181384	0.465394	0.878255	0.100097	0.192355
N-(5-Aminopentyl)acetamide	0.122959	0.752491	1.61494e-24	0.147503	3.89887e-08	0.368863	0.0639912	0.547591	0.22066	0.225956	0.112815	0.0286589	0.236144	0.197408	0.298416	0.0500312	0.506565	0.205386	0.0404753	2.20858e-07	8.16401e-07	0.104999	1.5458e-20	0.462957	0.208059	0.0137268	0.0424527	0.152081	0.469384	0.399133	0.195939	2.5893e-16	0.970093	0.000254859	0.0698819	0.0287421	0.349148	0.0534289	0.349119	0.0536693	0.234551	0.22372	0.063784	0.0652612	0.027728	0.893365	0.58626	0.550681	0.0961815
5-epi-smenospongiarine	0.481826	0.578833	0.012456	0.00585449	0.00939716	0.509758	0.139518	0.991372	0.002007	0.962287	0.0350519	0.386529	0.978282	0.0631662	0.0950004	0.0512562	0.101885	8.19435e-05	0.015272	0.102681	0.0123423	0.0734448	0.0153544	0.188894	0.096825	0.0348782	0.195279	0.0367294	0.605075	0.173212	0.903087	0.007045	0.361854	0.0136128	0.0499265	0.115066	0.160551	0.0701588	0.924169	0.0561351	0.596205	0.766315	0.00228749	0.0661716	0.670245	0.786752	0.0330708	0.18233	0.00233174
9-cis-Retinoic acid	0.211649	0.556215	0.175794	0.255042	0.00650421	0.0761326	0.0772166	0.926443	0.186972	0.723437	0.374152	0.253561	0.510665	1.06896e-23	0.253224	0.294576	0.257541	0.366412	0.070165	0.00713632	0.000786746	0.371189	0.267173	1.35876e-14	0.0783799	1.59393e-18	0.0191408	0.0239957	0.809989	8.33264e-17	0.445842	0.112493	1.62156e-08	0.180095	1.19863e-28	0.00972091	0.406594	2.27433e-24	0.186156	3.40738e-20	0.0248581	0.422469	0.503968	4.27523e-25	0.165429	0.731676	0.681944	1.4459e-14	0.234605
N-cis-11,14-eicosadienoyl ethanolamine	7.71071e-05	0.409537	0.109299	0.002643	0.026658	0.000104664	0.0040013	0.720518	0.000591818	0.532845	7.52443e-06	0.364132	0.968955	0.0139525	0.00677834	0.0189925	0.943759	0.372309	0.00909234	0.274047	0.0286522	0.00997048	0.241455	0.0041306	0.825119	0.0798246	0.336711	0.584717	0.516607	0.0105514	0.144947	0.206515	0.00348415	0.110402	0.0476428	0.0112778	0.00303401	0.0456054	0.724323	0.0389587	0.185518	0.254674	0.0118351	0.0521372	0.787304	0.084769	1.07906e-06	0.0059827	0.0366062
Monopropionylcadaverine	0.141319	0.959588	1.92797e-14	0.1559	3.05258e-07	0.455165	0.297108	0.383897	0.24972	0.240802	0.0933762	0.16261	0.273609	0.121005	0.321137	0.0965757	0.559566	0.246613	0.0446221	1.64633e-08	6.5533e-06	0.116206	2.27887e-14	0.493239	0.208903	0.00438614	0.0724955	0.0102969	0.499396	0.475253	0.227245	7.39736e-32	0.853232	0.00050146	0.0381631	0.0103173	0.321758	0.0390044	0.477746	0.0312372	0.30937	0.260305	0.188405	0.0336621	0.0653147	0.495532	0.562722	0.579738	0.146124
Pentylone	0.322045	0.921366	0.49575	0.416387	0.493314	0.426175	0.609719	0.984316	0.269701	0.570329	0.53063	0.999379	0.690441	0.572992	0.563086	0.7733	0.357358	0.617559	0.37174	0.8227	0.475862	0.593693	0.594973	0.670433	0.591797	0.594498	0.469896	0.565992	0.710798	0.676598	0.429801	0.664104	0.750231	0.512132	0.715921	0.589931	0.357665	0.652381	0.450175	0.136348	0.609136	0.742099	0.379955	0.48014	0.472855	1.59535e-07	0.315579	0.805786	0.631848
all-rac-3,4-Dehydro-alpha-tocopherol	0.74183	0.319011	0.300285	0.8831	0.362717	0.575549	0.0036325	0.528487	0.714616	0.0642544	0.537097	0.62787	0.382532	0.824216	0.690096	0.0610773	0.433741	0.140764	0.989367	0.872236	0.481107	0.143827	0.651028	0.874086	0.452678	0.736671	0.551499	0.152329	0.590489	0.986571	0.615224	0.531461	0.733569	0.321567	0.689217	0.559585	0.617987	0.697893	0.906924	0.607278	0.583401	0.964302	0.521032	0.599189	0.301992	0.988269	0.733651	0.845372	0.55819
MG(22:1(13Z)/0:0/0:0)	0.449278	0.419481	0.125535	0.445774	0.404261	0.125407	1.11552e-05	0.561312	0.416779	0.117484	0.308832	0.830499	0.847584	0.972606	0.445354	0.0374036	0.0170865	0.823135	0.62082	0.686662	0.294152	0.223501	0.281665	0.778328	0.332011	0.90052	0.159452	0.253113	0.746435	0.750681	0.0586519	0.461031	0.598335	0.284239	0.934652	0.452537	0.28432	0.904842	0.363824	0.88125	0.582394	0.712485	0.446555	0.914346	0.0152311	0.991	0.778737	0.844139	0.378259
Mompain	0.493544	0.207909	0.930099	0.138202	0.606858	0.0847939	0.000861838	0.93547	0.119886	0.0947225	0.50325	0.670102	0.635601	0.155515	0.224494	0.103087	0.274298	0.143461	0.217423	0.778045	0.452752	0.129944	0.80116	0.0474746	0.651041	0.562655	0.004246	0.376854	0.804749	0.0718716	0.0224542	0.642242	0.0363387	0.421185	0.283152	0.73826	0.382823	0.235583	0.834901	0.439551	0.83068	0.8856	0.147568	0.494815	0.0011189	0.800268	0.745872	0.038497	0.0239381
3-(1-Hydroxymethyl-1-propenyl)pentanedioic acid	0.349494	0.267925	0.0390343	0.42693	0.0586615	0.481382	0.256169	0.669719	0.390084	0.513587	0.312324	0.475919	0.655051	0.525632	0.3737	0.417511	0.201805	0.962885	0.415438	0.136373	0.209171	0.409616	0.0556101	0.941655	0.645254	0.274508	0.667232	2.41666e-05	0.647583	0.968934	0.287649	0.000106433	0.730184	0.00189461	0.46468	0.0494548	0.487818	0.510399	0.809469	0.463947	0.550517	0.733304	0.94403	0.406331	0.406081	0.184149	0.465378	0.896401	0.883017
Oxindole	0.0114942	0.146583	0.587934	0.0013603	0.371899	0.125283	0.281178	0.0404599	0.00973998	0.508644	0.0569338	0.320848	0.792833	0.114847	0.0141812	0.00721761	0.0348144	0.383575	0.000613169	0.754608	0.594552	0.0599181	0.528921	0.0339956	0.685579	0.454097	0.38303	0.358919	7.16418e-06	0.0646873	0.0704614	0.353849	0.0132993	0.527503	0.257279	0.139373	0.342611	0.322442	0.488157	0.332731	0.591952	0.000765184	0.0883323	0.306709	0.58741	0.134584	0.00713857	0.0712893	0.00203026
Neopine	0.0951659	0.310183	0.785023	0.092101	0.863662	0.0273311	0.1	0.586843	0.0197029	0.109108	0.0505957	0.978648	0.321691	0.160962	0.114006	0.617766	0.389222	0.925378	0.136029	0.947695	0.918333	0.221093	0.680046	0.174592	0.301821	0.153017	0.210249	0.928806	0.944515	0.122733	0.3241	0.813498	0.213941	0.705268	0.159765	0.0660118	0.0179084	0.150625	0.40688	0.0309622	0.438831	0.420688	0.941185	0.0758838	0.37198	5.60283e-06	0.11589	0.194958	0.182633
L-Tyrosine	0.0793684	0.91094	0.110208	0.602552	0.000144356	0.0745577	0.0709641	0.555395	0.445492	0.250148	0.183111	0.514575	0.346824	0.453484	0.114865	0.0811768	0.74299	0.667644	0.271515	0.832541	0.0222821	0.0921218	0.0451027	0.214496	0.750367	0.753277	0.231569	0.216882	0.372058	0.195012	0.0704412	0.108041	0.060324	0.13699	0.532019	0.000859512	0.161301	0.661038	0.305596	0.473402	0.220404	0.712785	0.383806	0.632866	0.0557206	0.964587	0.293757	0.154725	0.467307
5-(N,N-Hexamethylene)amiloride	0.185357	0.931514	0.374821	0.144331	0.244898	0.223818	0.0995291	0.570654	0.127069	0.57456	0.040598	0.782582	0.76603	0.374509	0.16511	0.219738	0.197061	0.624407	0.0908565	0.547176	0.494345	0.187121	0.683407	0.574409	0.808624	0.362145	0.369127	0.976505	0.560314	0.397036	0.33155	0.160773	0.399914	0.937543	0.644479	3.74157e-05	0.0154769	0.77055	0.975297	0.596323	0.257986	0.539616	0.181477	0.379613	0.59929	0.0682406	0.0855678	0.560746	0.179851
Topsentisterol D3	0.0102225	0.786557	0.0666686	0.839097	0.0468568	0.179928	0.00617876	0.862959	0.434139	0.114509	0.150865	0.217	0.558039	0.794682	0.456463	0.00179586	0.792471	0.78072	0.783318	0.0872895	0.0910857	0.000590159	0.0645621	0.931871	0.710031	0.525685	0.477305	0.41235	0.737824	0.62363	0.851209	0.0457668	0.859978	0.0502228	0.650739	0.0514151	0.213475	0.688169	0.507825	0.900163	0.584639	0.976913	0.211282	0.79586	0.0959491	0.883029	0.607799	0.923652	0.339286
Antibiotic BE 14106	0.765048	0.00290664	0.57478	0.235496	0.698521	0.506901	0.386497	0.633321	0.143352	0.440501	0.565932	0.550972	0.434456	0.967895	0.255882	0.744449	0.307837	0.254522	0.291455	0.626568	0.524351	0.547211	0.69402	0.890473	0.561586	0.58151	0.557943	0.0969185	0.588611	0.90082	0.785834	0.645416	0.684856	0.515179	0.724191	0.925111	0.525294	0.667837	0.345283	0.673317	0.437534	0.544443	0.147811	0.73378	0.440383	0.958299	0.340016	0.883104	0.75706
(-)-Cladielline	0.451515	0.185078	0.350008	9.48234e-06	0.0573405	0.0355306	0.0194141	0.711889	5.59217e-06	0.865648	0.130427	0.158907	0.706232	0.00433402	0.000336575	0.981454	0.542328	0.00344922	0.000104572	0.195074	0.078304	0.992386	0.310105	0.000730309	0.951256	0.0189958	0.0295425	0.781508	0.935358	0.00426384	0.235582	0.299443	0.000838292	0.340347	0.0131655	0.185666	0.2622	0.0188175	0.329989	0.00983887	9.64952e-05	0.794388	0.0810222	0.0156825	0.861146	0.602299	0.000105232	0.000511292	5.75572e-05
Dicranin	0.0834668	0.604103	0.687787	0.13531	0.0430107	0.0239576	0.0221721	0.328419	0.0967047	0.557112	0.198062	0.221207	0.847827	4.46352e-17	0.0281321	0.0325925	0.485918	0.48918	0.0842147	0.270319	0.0333583	0.0602903	0.802647	3.27267e-27	0.199872	8.36956e-08	0.00720336	0.121568	0.198539	1.5719e-25	0.26468	0.705232	7.01608e-23	0.564864	5.0527e-12	0.00425432	0.880721	4.83149e-11	0.307924	6.9041e-11	0.0138867	0.390152	0.337272	2.45854e-11	0.170153	0.522257	0.273115	3.54257e-29	0.104323
gamma-Aminobutyryllysine	0.161728	0.736623	1.56648e-05	0.249053	1.01617e-08	0.128168	0.0946964	0.844009	0.195887	0.391916	0.0585636	0.944135	0.321027	0.29014	0.18283	0.0419918	0.478901	0.395812	0.0976792	0.146815	2.03679e-05	0.107979	2.19983e-05	0.351481	0.606189	0.025564	0.31614	0.0659231	0.458042	0.238693	0.130106	1.1677e-05	0.516045	4.03753e-05	0.07977	1.97102e-06	0.0392762	0.0894232	0.36375	0.0467802	0.157641	0.477288	0.470223	0.0688108	0.0918389	0.74298	0.282455	0.360896	0.308626
Protoporphyrin IX	0.415909	0.230184	0.0807551	6.25772e-05	0.0450192	0.0477949	2.07339e-05	0.540342	0.00207441	0.0650498	0.3148	0.818014	0.828199	0.0428328	0.163711	0.0835591	0.173737	0.112113	2.05806e-05	0.0786121	0.0855022	0.0284037	0.0995816	0.0267207	0.529433	0.0586714	0.0043154	0.350345	0.900156	0.0260064	0.208894	0.0825314	0.0623732	0.137401	0.0571943	0.22223	0.441556	0.0568734	0.606904	0.073804	0.170471	0.832546	0.679702	0.0828231	0.0222186	0.993672	0.250074	0.0186686	0.000113445
Tuberonic acid glucoside	0.0025931	0.650065	0.296705	0.000556442	0.285017	0.0550793	0.316076	0.996253	0.0183248	0.876429	0.234934	0.774576	0.715706	0.146392	0.208717	0.886925	0.75236	0.740865	0.172691	0.391719	0.245284	0.861547	0.424705	0.110884	0.800044	0.174089	0.937997	0.614448	0.807675	0.11537	0.541528	0.475088	0.123288	0.439697	0.177167	0.656189	0.586537	0.163351	0.783065	0.170385	0.989966	0.733055	0.309448	0.203835	0.659947	0.63838	0.011639	0.101394	0.52478
zinniol	0.054957	0.119973	0.873052	0.102646	0.1467	0.00838976	0.019361	0.999994	0.0224742	0.19369	0.0163977	0.880351	0.981263	0.0206695	0.0173701	0.0136326	0.155281	0.285635	0.0535105	0.375003	0.228664	0.0245639	0.912831	0.00213675	0.733286	0.174955	0.168676	0.728406	0.293051	0.00182778	0.118343	0.780958	0.000690515	0.40239	0.0494628	0.00439164	0.0384768	0.0866261	0.409217	0.100054	0.089823	0.368752	0.0210133	0.0685997	0.457116	0.827932	0.0162108	0.00208786	0.0349938
Cauloside B	0.775685	0.511217	0.882724	0.791886	0.270444	0.362081	0.271739	0.651011	0.934499	0.911795	0.884864	0.0641996	0.425453	0.4078	0.553938	0.53433	0.224908	0.256698	0.339911	0.756307	0.923956	0.664555	0.880531	0.250126	0.659553	0.986955	0.283722	0.635505	0.228344	0.299713	0.201436	0.64685	0.174439	0.859214	0.614819	0.569188	0.62199	0.719333	0.359018	0.674124	0.36709	0.564314	0.729818	0.797209	0.455686	0.396205	0.108058	0.302377	0.848104
5-beta-Androstane-3-alpha,17-beta-diol	0.0829574	0.438626	0.648823	0.0701207	0.229862	0.0256791	0.0139238	0.191309	0.0594271	0.432754	0.0817207	0.219141	0.790865	2.92802e-08	0.00741894	0.0490149	0.686462	0.630261	0.0886665	0.980147	0.451385	0.0616561	0.64976	2.96461e-15	0.563818	0.0048412	0.0321858	0.282314	0.0878029	1.365e-11	0.298008	0.568328	1.06637e-27	0.982311	5.66436e-05	0.0109242	0.592077	0.00014659	0.837531	7.8079e-05	0.0200894	0.361938	0.276666	0.000108548	0.49327	0.414493	0.0216592	1.78814e-15	0.0869485
Antimycin A7a	0.844885	0.00629145	0.446234	0.92329	0.982169	0.162487	0.623251	0.741928	0.454226	0.385512	0.526717	0.954402	0.3496	0.849104	0.0505374	0.483436	0.633124	0.615631	0.958139	0.396588	0.85506	0.437723	0.313124	0.429991	0.293008	0.684418	0.528587	0.204724	0.668564	0.669949	0.359682	0.261325	0.214409	0.746212	0.938864	0.678122	0.72858	0.916829	0.818839	0.900571	0.275222	0.624855	0.540118	0.99058	0.863136	0.672027	0.246005	0.318423	0.412634
7alpha-Hydroxy-5beta-cholan-24-oic Acid	0.197773	0.324388	0.348092	0.0724414	0.18363	0.405728	0.312365	0.859019	0.0943376	0.568619	0.481607	0.660223	0.278574	0.159235	0.0237065	0.385503	0.00411854	0.220407	0.0167838	0.261876	0.423928	0.928352	0.283914	0.0680734	0.973784	0.328424	0.02941	0.359037	0.030218	0.0609316	0.0982823	0.282307	0.055745	0.471783	0.182173	0.39784	0.967282	0.229878	0.651928	0.280388	0.1734	4.41866e-10	0.751973	0.195248	0.716787	0.525681	0.462976	0.127099	0.00289686
Myxopyronin B	0.0243009	0.87151	0.880781	0.202629	0.883844	0.116644	0.83674	0.0531309	0.0355303	0.991396	0.00731324	0.989651	0.207084	0.514213	0.021954	0.408137	0.216771	0.441896	0.540212	0.732629	0.419982	0.422462	0.632858	0.799683	0.527327	0.381737	0.169273	0.27696	0.124873	0.768989	0.141458	0.90033	0.454936	0.828759	0.361579	0.241379	0.000258864	0.451371	0.110008	0.698152	0.559584	0.556915	0.596151	0.536544	0.11103	0.131343	0.274023	0.86383	0.479784
Piptamine(antibiotic)	0.159956	0.777895	0.0293336	0.00793754	0.00504575	0.352916	0.0531412	0.912845	0.00175824	0.735071	0.0597544	0.682944	0.852675	0.0995329	0.244302	0.212797	0.119736	0.0615231	6.958e-05	0.0344294	0.018552	0.274328	0.0158277	0.147278	0.776121	0.0548389	0.0189535	0.206982	0.479069	0.125618	0.749642	0.00831537	0.240302	0.0420975	0.060604	0.0479162	0.162354	0.0962719	0.0823408	0.0859921	0.0247095	0.072636	0.247541	0.0742614	0.649548	0.480097	0.0714486	0.160614	0.000140726
N-Oleoyl dopamine	0.522249	0.111673	0.0792612	1.6147e-05	0.0662425	0.0184197	0.0162186	0.411703	2.02902e-06	0.467382	0.350477	0.123243	0.606955	0.0244224	2.74469e-05	0.963133	0.0470973	4.78204e-09	0.00054293	0.0279938	0.0642648	0.767391	0.104496	0.034313	0.915358	0.0141314	0.0247975	0.168343	0.792234	0.0503014	0.12873	0.102826	0.0756751	0.157171	0.0268509	0.486469	0.698767	0.0261777	0.504025	0.0363319	0.00952672	0.546021	0.0158699	0.0267468	0.621634	0.762573	0.00546685	0.0257235	1.07916e-06
1-Aminopiperidine	0.12268	0.0300806	0.0177551	0.291429	0.00259703	0.0652451	0.119136	0.683216	0.189184	0.481526	0.15269	0.349273	0.657141	7.22975e-05	0.344781	0.084234	0.396132	0.269919	0.0566163	0.00053061	0.0041082	0.115089	0.0307085	0.00812383	0.360158	6.18582e-06	0.0757565	0.000153144	0.66003	0.00372848	0.0769704	0.000173107	0.110118	0.000584833	4.27682e-05	0.0190181	0.934098	0.000104384	0.739817	0.000285422	0.252758	0.467449	0.356209	8.49647e-05	0.249718	0.279445	0.506663	0.0151543	0.201473
theobromine	0.0195217	0.921911	0.0491158	0.806601	0.0227563	0.178927	0.292768	0.740637	0.834662	0.196754	0.104897	0.00777054	0.240012	0.207982	0.27243	0.172823	0.343584	0.0159006	0.957843	0.0591935	0.0506135	0.124665	0.124593	0.262483	0.655206	0.19919	0.192839	0.4058	0.369808	0.133904	0.288283	0.0699732	0.29609	0.0933507	0.183706	0.36296	0.204987	0.157211	0.345937	0.170523	0.140989	0.49374	0.278237	0.146635	0.113685	0.0751513	0.80312	0.282362	0.379948
Hydroxy-gamma-sanshool	0.499332	0.420826	0.857818	0.107298	0.618248	0.67093	0.688422	0.807804	0.0578743	0.193845	1.53851e-05	0.476682	0.662007	0.325063	0.330868	0.785041	0.837608	0.39202	0.774706	0.454488	0.259044	0.118271	0.730575	0.361166	0.0517474	0.306991	0.265106	0.493011	0.784702	0.373865	0.459274	0.993501	0.719999	0.26121	0.219387	0.209219	1.13292e-10	0.321115	0.831031	0.526267	0.670789	0.736066	0.821901	0.380283	0.420558	0.117374	0.0983511	0.381544	0.549128
Dictamnoside B	0.0211009	0.628076	0.779595	0.203349	0.899402	0.130468	0.564819	0.0988573	0.0411872	0.936468	0.0105798	0.959721	0.207576	0.46531	0.0349792	0.462824	0.168269	0.537425	0.581271	0.749424	0.466836	0.538956	0.619382	0.666254	0.663861	0.409628	0.333333	0.471305	0.230084	0.688988	0.166095	0.877538	0.567426	0.892558	0.340925	0.167731	0.000603756	0.436279	0.107956	0.677661	0.699774	0.651531	0.651838	0.526905	0.0961552	0.169067	0.279816	0.746599	0.550404
Dendroxine	0.532891	0.651141	0.0685521	0.745982	0.277953	0.275691	0.632123	0.0933211	0.608839	0.202701	0.185484	0.206069	0.304346	0.887545	0.319895	0.220517	0.218116	0.957621	0.890938	0.00935561	0.357625	0.125296	0.0533474	0.524919	0.302782	0.581494	0.23557	0.632062	0.66977	0.8167	0.0358199	0.0597823	0.269399	0.0432916	0.824255	0.448505	0.286212	0.841617	0.260751	0.942647	0.961351	0.588667	0.0751514	0.879571	0.164338	0.936504	0.717748	0.386409	0.812852
Octadecylamine	0.00473193	0.945222	0.0377094	0.283446	0.0139945	0.124917	0.00396601	0.610652	0.0436203	0.851192	0.0276845	0.952744	0.934283	0.0355153	0.139038	0.0370375	0.746674	0.680342	0.0756726	0.0381933	0.0305909	0.0657147	0.0377525	0.0503018	0.427417	0.0420145	0.500701	0.066463	0.786259	0.0292086	0.524479	0.0282045	0.0650253	0.14257	0.0398317	0.00215866	0.163392	0.0561377	0.347262	0.0429723	0.0135399	0.0305353	0.220012	0.0382256	0.577151	0.376964	0.080915	0.0624319	0.11391
Anhydroamarouciaxanthin B	0.666398	0.676172	0.0119176	0.183061	0.0986564	0.536801	0.723881	0.696591	0.125502	0.72143	0.0573201	0.755637	0.418301	0.0919464	0.271505	0.795675	0.592462	0.622913	0.168168	0.037653	0.0643901	0.986755	0.0134677	0.55161	0.332051	0.0057805	0.678606	5.48079e-05	0.811023	0.504939	0.621352	0.00725045	0.96614	0.000211407	0.0433154	0.13349	0.271006	0.0132861	0.698826	0.0151501	0.346492	0.486527	0.740851	0.0196329	0.762679	0.654494	0.200606	0.629909	0.899416
Fissoldhimine	0.360801	0.41046	0.156553	0.204113	0.195788	0.29832	0.926674	0.809342	0.134066	0.37041	0.0559833	0.837637	0.459811	0.350395	0.350732	0.464851	0.399604	0.804479	0.323776	0.0358554	0.168872	0.238446	0.0751683	0.807544	0.473928	0.103517	0.738341	0.429064	0.646593	0.69629	0.246289	0.120692	0.980132	0.0302432	0.242754	0.421975	0.152106	0.227055	0.635769	0.325082	0.973769	0.561031	0.284374	0.247264	0.648552	0.598474	0.770787	0.911667	0.643237
Gibberellin A14-aldehyde	0.395268	0.343891	0.557877	0.670731	0.510675	0.493329	0.769822	0.554703	0.816995	0.588002	0.991029	0.278942	0.183038	0.930103	0.51203	0.378589	0.156228	0.633946	0.661007	0.142344	0.240723	0.217638	0.642384	0.600974	0.697273	0.511498	0.854806	0.432812	0.563518	0.593774	0.202368	0.675008	0.344465	0.837942	0.892989	0.655917	0.938546	0.75249	0.0516012	0.930822	0.312223	0.782043	0.870601	0.765816	0.486461	0.584363	0.662159	0.501948	0.778031
2-Acetonyl-3,5-dihydroxy-7-methoxy-1,4-naphthoquinone	0.149079	0.642398	1.80123e-14	0.27425	3.64378e-12	0.30459	0.0555602	0.516774	0.324063	0.359933	0.221938	0.103382	0.211694	0.0988477	0.369908	0.030894	0.847708	0.243504	0.0341529	1.93094e-05	4.45703e-08	0.0772522	4.351e-13	0.254616	0.171555	0.00381682	0.0309337	0.24968	0.420142	0.16228	0.136944	2.06552e-11	0.590896	0.000619283	0.0262177	0.000334989	0.410714	0.026426	0.32389	0.018162	0.242938	0.239116	0.0570137	0.0235625	0.0211543	0.993985	0.696531	0.300823	0.069284
CARBETAPENTANE	0.265473	0.742564	0.673176	0.115449	0.734554	0.496774	0.622051	0.787928	0.023531	0.0929648	1.80204e-05	0.179055	0.5222	0.172875	0.0773003	0.496752	0.515084	0.424434	0.816772	0.354717	0.195728	0.118162	0.944757	0.269255	0.757246	0.145439	0.734475	0.588098	0.835368	0.251458	0.753282	0.966575	0.808784	0.562394	0.0808061	0.0266244	2.32653e-11	0.114588	0.990347	0.304091	0.748168	0.793319	0.850432	0.173563	0.815423	0.0184791	0.0393113	0.290487	0.940236
Serotonin	0.363192	0.65049	0.403548	0.906344	0.619831	0.459023	0.411408	0.94015	0.961632	0.880663	0.741707	0.249293	0.781665	0.137885	0.528579	0.785355	0.182462	0.414935	0.542335	0.321761	0.696724	0.136185	0.419725	0.171201	7.98809e-10	0.180372	0.000203543	0.727764	0.752345	0.157457	0.549834	0.498912	0.384157	0.319204	0.0852694	0.807899	0.763066	0.0825446	0.153674	0.082849	0.621483	0.706383	0.878047	0.090667	0.840594	0.465301	0.945271	0.188208	0.402878
Dehydrocarvacrol	0.252264	0.943938	0.0602751	0.910078	0.0701839	0.332897	0.797652	0.478037	0.824257	0.984166	0.703974	0.485821	0.363395	4.53637e-07	0.86041	0.549107	0.287239	0.527398	0.849038	0.000898141	0.00769279	0.604318	0.111379	0.00051128	0.0402748	8.32687e-12	0.160836	0.00763497	0.461216	1.5335e-05	0.962015	0.0294633	0.0403795	0.180247	2.90037e-10	0.0642323	0.394911	1.23844e-10	0.0881386	5.38435e-09	0.0506276	0.467189	0.732009	3.17059e-11	0.200477	0.998475	0.156927	0.000528484	0.737518
LysoPC(P-18:0/0:0)	0.246424	0.569051	0.199362	0.46551	0.176615	0.301757	0.12927	0.52488	0.284814	0.530219	0.0521137	0.883754	0.434454	0.102967	0.121906	0.258005	0.482164	0.237736	0.239504	0.467225	0.426354	0.259218	0.313751	0.177733	0.462436	0.140935	0.213759	0.00276444	0.305581	0.164634	0.192886	0.0207822	0.191897	0.0435457	0.108715	0.012625	0.101786	0.139319	0.458394	0.108584	0.271464	0.720242	0.570457	0.0837334	0.183267	0.109843	0.125403	0.201106	0.889125
ent-Emtricitabine	0.218583	0.396105	0.317822	0.42477	0.732866	0.319126	0.505367	0.461297	0.315597	0.345919	0.161525	0.395054	0.696235	0.511952	0.188463	0.637059	0.895081	0.307637	0.387522	0.335712	0.877958	0.447258	0.478005	0.297918	0.82985	0.573493	0.393191	0.943783	0.401824	0.302824	0.398721	0.353202	0.0442572	0.859104	0.98489	0.501255	0.185502	0.951135	0.662381	0.829307	0.569661	0.900323	0.332374	0.97299	0.851809	0.901837	0.233634	0.211006	0.630665
Clobetasol propionate	0.239374	0.868017	0.985869	0.528163	0.398884	0.184106	0.179135	0.593902	0.651654	0.48771	0.995825	0.48583	0.903859	3.83122e-05	0.633547	0.252633	0.127442	0.653945	0.349068	0.0179522	0.995871	0.303171	0.984831	4.01999e-05	0.88733	0.00228	0.503055	0.00689779	0.562226	6.43259e-05	0.510976	0.761557	0.000602346	0.622524	0.000412818	0.0630118	0.0614567	0.000911276	0.527445	0.00235064	0.681942	0.637527	0.412765	0.000824799	0.328446	0.478318	0.937756	9.64343e-05	0.368978
Nemorensine	0.192021	0.473832	0.000712912	0.200978	0.367249	0.651849	0.0944259	0.852819	0.305069	0.159961	0.101841	0.0621185	0.712654	0.551604	0.699347	0.339917	0.0881834	0.0860124	0.212138	0.000483568	0.590065	0.235486	0.000819015	0.966758	0.463522	0.413947	0.405232	0.361253	0.63755	0.908115	0.996773	0.000523688	0.67619	0.958444	0.759729	0.0793126	0.165739	0.831141	0.340609	0.78303	0.194384	0.742107	0.0415409	0.578256	0.404311	0.648707	0.270245	0.968713	0.224175
Tylopiol B	0.0777294	0.16921	0.245025	0.00473214	0.0337706	8.93277e-05	7.60429e-08	0.807281	0.0012916	0.02812	0.0296563	0.319144	0.465253	0.0305511	0.00742564	0.0025207	0.426611	0.100259	0.00364908	0.538665	0.0767596	0.000455231	0.419038	0.00334087	0.805144	0.362231	0.0114079	0.341221	0.772652	0.00760371	0.103954	0.276669	0.00174063	0.364792	0.155511	0.0204257	0.0811112	0.203695	0.666674	0.158174	0.0748518	0.948849	0.0479677	0.222066	0.0130287	0.216688	0.00313841	0.00209201	0.00146298
4-Hydroxynonenal	0.551419	0.219418	0.0871413	0.521588	0.138419	0.684585	0.409461	0.699327	0.514485	0.600705	0.558616	0.552485	0.698226	0.701892	0.481759	0.57332	0.244572	0.857624	0.586036	0.257939	0.296178	0.578304	0.0922092	0.8778	0.724277	0.493626	0.653665	9.52636e-05	0.700596	0.807068	0.315679	0.000832118	0.671912	0.00119361	0.607122	0.436618	0.811719	0.639401	0.683395	0.615382	0.693589	0.840004	0.658112	0.636223	0.515874	0.35327	0.564932	0.82618	0.969773
Ganoderic acid DM	0.029055	0.244372	0.202979	0.00931102	0.0226025	2.57748e-05	1.80598e-07	0.857592	0.00130381	0.0381981	0.00407998	0.294655	0.455275	0.0243185	0.00223033	0.000111855	0.339778	0.177593	0.00583763	0.573577	0.05376	2.12202e-05	0.340895	0.00180775	0.755368	0.334999	0.00795818	0.421151	0.30665	0.00386557	0.0664676	0.274447	0.000510975	0.316048	0.132276	0.00439618	0.0204383	0.172304	0.896176	0.129337	0.137096	0.748403	0.0102387	0.186944	0.0135922	0.164702	0.00446114	0.0013979	0.00233455
Tehranolide	0.739461	0.0569936	0.598774	0.0365909	0.940222	0.190642	0.335478	0.419145	0.0936745	0.318781	0.177807	0.113487	0.616292	0.427443	0.0520806	0.35116	0.089857	0.117902	0.0547665	0.594098	0.977392	0.227291	0.868533	0.496517	0.223777	0.439924	0.477807	0.992595	0.704033	0.441801	0.226431	0.94802	0.716549	0.536458	0.540079	0.829318	0.199373	0.549338	0.0819202	0.891727	0.786351	0.599784	0.031815	0.460988	0.539385	0.485584	0.0138274	0.594149	0.191408
Arg Lys Leu	0.51661	0.910367	0.497281	0.285248	0.428767	0.299376	0.762464	0.540671	0.426358	0.965094	0.150192	0.472928	0.284272	0.789073	0.809265	0.841574	0.99289	0.36362	0.7716	0.39293	0.980008	0.905349	0.362263	0.770256	0.150409	0.882959	0.24333	0.905161	0.826673	0.544133	0.921875	0.442644	0.906513	0.918049	0.750489	0.404137	0.391237	0.98117	0.0119552	0.7489	0.407041	0.999248	0.679427	0.805611	0.464372	0.929712	0.427629	0.885962	0.795747
(3R)-3,18-dihydroxyoctadecanoic acid	0.838397	0.445138	0.839777	0.00200354	0.404976	0.960416	0.528635	0.050632	0.00855075	0.961371	0.665422	0.237197	0.635844	0.349326	0.125239	0.648959	0.0438806	0.0530419	0.0064502	0.692098	0.268735	0.310191	0.549142	0.305574	0.558578	0.461292	0.184161	0.793104	0.131914	0.536806	0.857826	0.967535	0.127899	0.925612	0.411841	0.166028	0.949955	0.340931	0.83889	0.384202	0.392415	0.702274	0.595385	0.468742	0.78566	0.857125	0.476101	0.222165	0.000176276
Cochinchinenin C	0.926343	0.00281964	0.970434	0.968092	0.69796	0.204677	0.647746	0.509603	0.523007	0.63758	0.739037	0.955884	0.384628	0.570104	0.0471919	0.387928	0.262213	0.913899	0.878306	0.827774	0.92111	0.445234	0.789464	0.8926	0.4366	0.640557	0.558247	0.201052	0.431666	0.930925	0.405763	0.66195	0.622491	0.886767	0.658063	0.428681	0.954362	0.858875	0.952966	0.977969	0.235237	0.607666	0.517026	0.812793	0.864422	0.508222	0.230125	0.76594	0.671207
Ormocarpin	0.184284	0.153202	0.481519	0.670921	0.796038	0.637797	0.207119	0.359006	0.543071	0.380623	0.935277	0.0687318	0.0883253	0.225239	0.442172	0.249378	0.767144	0.746714	0.41735	0.636022	0.919231	0.0849026	0.776002	0.193951	0.000175701	0.538854	0.0388246	0.463576	0.219067	0.209972	0.35045	0.673408	0.377211	0.843996	0.2875	0.856693	0.998614	0.278335	0.102869	0.458334	0.259456	0.589804	0.57288	0.351601	0.00618937	0.43101	0.861203	0.160967	0.370679
Agallochin H	0.22666	0.392476	0.145191	9.6043e-09	0.0242056	0.0287435	0.000913919	0.618374	2.05008e-07	0.846118	0.0409222	0.235606	0.517628	0.00692985	0.00089408	0.800573	0.163142	0.00044062	1.28252e-11	0.109	0.0490293	0.812672	0.144969	0.00231154	0.793348	0.0223534	0.0304952	0.355113	0.983189	0.00888824	0.317774	0.150472	0.00275523	0.190509	0.0193365	0.150308	0.242484	0.024394	0.244036	0.0173714	0.0412064	0.833751	0.0280083	0.023488	0.780656	0.587031	1.6112e-05	0.00166801	9.43387e-10
Pfaffic acid	0.0137013	0.602541	0.341891	0.478757	0.0803906	0.0536975	0.124132	0.0907858	0.908812	0.847869	0.420393	0.738054	0.290291	0.0706997	0.0315429	6.49565e-05	0.251968	0.287359	0.442479	0.790404	0.143525	0.00516909	0.438394	0.0130198	0.75276	0.303339	0.024311	0.876922	0.00223717	0.00617931	0.00294926	0.420846	0.00254102	0.946429	0.106018	0.00554653	0.599747	0.181287	0.0727939	0.147159	0.668372	0.012524	0.0889881	0.140833	0.00356461	0.431864	0.752988	0.0224567	0.815905
Dianthin C	0.523346	0.992514	0.810677	0.425188	0.246881	0.296093	0.168248	0.813567	0.805348	0.653954	0.598856	0.256194	0.660326	0.14225	0.725389	0.0942795	0.975623	0.24575	0.712066	0.148168	0.729417	0.163654	0.845365	0.15432	0.344402	0.264585	0.21418	0.0412003	0.816842	0.115951	0.119465	0.709717	0.288484	0.962256	0.164103	0.0931435	0.160556	0.270368	0.273192	0.323132	0.383865	0.846105	0.0369944	0.275422	0.327364	0.785009	0.847396	0.189036	0.338736
N-Stearoyl Leucine	0.747885	0.230032	0.422195	8.64482e-06	0.169734	0.348027	0.0102949	0.903202	0.00142056	0.604215	0.626503	0.665487	0.675713	0.0891452	0.0906621	0.428055	0.0024857	0.000144485	3.97421e-07	0.355498	0.314881	0.439689	0.352171	0.0276168	0.950208	0.183688	0.0156725	0.835905	0.544446	0.050731	0.562011	0.35673	0.0360244	0.544783	0.149157	0.680734	0.76893	0.193931	0.453717	0.197048	0.398942	0.732571	0.343545	0.192678	0.77094	0.795705	0.232179	0.020913	1.59107e-09
gamma-Glutamylserine	0.547509	0.238937	0.197333	0.5902	0.265701	0.937712	0.439289	0.743757	0.272061	0.000183236	0.595828	0.705657	0.650493	0.847728	0.373916	0.995312	0.735367	0.794275	0.377515	0.418165	0.479329	0.428832	0.140477	0.5606	0.00663568	0.789776	0.178929	0.767615	0.656544	0.674889	0.698175	0.172275	0.330943	0.346701	0.950193	0.882939	0.939514	0.858402	0.023681	0.782103	0.601071	0.63078	0.81299	0.850973	0.181432	0.544799	0.122381	0.534029	0.447988
Isoleucyl-Tyrosine	0.729601	0.375638	0.508929	0.286775	0.501561	0.35696	0.705331	0.588226	0.21782	0.577571	0.682257	0.304689	9.91036e-15	0.669312	0.739876	0.711985	0.71149	0.675552	0.623415	0.638443	0.585322	0.550919	0.527227	0.969793	0.0786935	0.383053	0.636204	0.87272	0.709204	0.816812	0.00176521	0.461926	0.612803	0.63431	0.472268	0.413825	0.381691	0.482214	3.00626e-11	0.454119	0.634528	0.875465	0.945099	0.462998	0.00837985	0.682142	0.341515	0.863643	0.636318
3-hydroxy-24,25,26,27-tetranortirucall-7-ene-23(21)-lactone	0.461412	0.139802	0.775471	0.14392	0.665674	0.111255	0.708635	0.413306	0.094751	0.912093	0.861629	0.667819	0.733119	0.875625	0.00971523	0.39101	0.317131	0.176787	0.623151	0.382554	0.216569	0.402848	0.825507	0.533923	0.51234	0.360668	0.230599	0.870218	0.332331	0.747384	0.0389443	0.429724	0.251053	0.671567	0.557015	0.918278	0.729873	0.590241	0.350346	0.506761	0.642484	0.540199	0.0262624	0.475058	0.262502	0.345386	0.068674	0.513964	0.316449
Hypaphorine	0.00158912	0.273221	0.378512	0.296333	0.518921	0.0175031	0.348609	0.585882	0.201243	0.674548	0.458213	0.533049	0.695513	0.85147	0.118346	0.408703	0.721869	0.544817	0.726414	0.556043	0.373869	0.263953	0.540423	0.823351	0.685965	0.537047	0.819735	0.567055	0.922301	0.779061	0.330236	0.495803	0.843797	0.362566	0.789836	0.319865	0.380873	0.680628	0.802149	0.741697	0.99866	0.82774	0.0596446	0.640927	0.792887	0.385359	0.457121	0.815636	0.180324
Myxalamid A	0.830496	0.134344	0.275068	0.0314748	0.913753	0.226345	0.850042	0.372987	0.0160046	0.453137	0.384987	0.616092	0.876561	0.706858	0.00887332	0.447531	0.0221719	4.69109e-05	0.463613	0.149012	0.439416	0.213705	0.52291	0.844838	0.636033	0.194434	0.669873	0.427414	0.557726	0.831592	0.471412	0.184738	0.392713	0.273441	0.504803	0.936866	0.517648	0.455284	0.492301	0.454437	0.083031	0.0315644	0.687461	0.394682	0.426138	0.549703	0.111823	0.710104	0.205533
Gigantamide A	0.720422	0.490802	0.0233286	0.872167	0.0259506	0.889074	0.928885	0.215669	0.769149	0.15481	0.12945	0.388121	0.570108	0.480431	0.741549	0.0925575	0.889843	0.946499	0.710496	0.091395	0.18033	0.0315324	0.00455212	0.396247	0.256792	0.457614	0.621469	0.775312	0.313381	0.509185	0.882603	0.0192704	0.546646	0.0536191	0.49158	0.1242	0.158322	0.449073	0.635093	0.542448	0.387252	0.45848	0.411057	0.53622	0.88799	0.980386	0.758006	0.457394	0.893973
Varitriol	0.703339	0.544406	0.864741	0.478891	0.645715	0.209581	0.110064	0.968883	0.173469	0.794015	0.378186	0.311408	0.588514	0.0216345	0.135037	0.0575479	0.174728	0.17842	0.219996	0.97146	0.785957	0.171261	0.808018	0.0035254	0.367898	0.0664293	0.134229	0.913102	0.306129	0.00371761	0.287298	0.559412	0.00762557	0.883183	0.013298	0.220784	0.522663	0.0218685	0.242687	0.0433941	0.359769	0.527443	0.157796	0.0196556	0.267367	0.714167	0.262311	0.00507998	0.15738
Longipedlactone J	0.713168	0.431678	0.298918	0.0143381	0.174375	0.791346	0.113228	0.734694	0.0210096	0.648571	0.0792455	0.757006	0.756763	0.208029	0.0984292	0.768399	0.125867	0.185731	2.79924e-05	0.296873	0.385373	0.952806	0.258757	0.123278	0.858574	0.484941	0.397102	0.393786	0.208832	0.315546	0.391364	0.24915	0.0856345	0.474108	0.35986	0.259339	0.470621	0.410604	0.620321	0.388056	0.941864	0.0246216	0.00252531	0.406334	0.669333	0.361321	0.00271754	0.199582	0.000554631
Urolithin A	0.262634	0.437233	0.916316	0.579706	0.254891	0.445045	0.151608	0.90963	0.250303	0.927622	0.645417	0.628049	0.626485	0.0274082	0.0663564	0.39614	0.52993	0.52704	0.980895	0.802122	0.133466	0.790157	0.651659	0.051162	0.768462	0.011708	0.0979169	0.885114	0.708109	0.0111412	0.0398238	0.887665	0.029009	0.574885	0.0112187	0.107752	0.917721	0.00671988	0.397934	0.0143651	0.88407	0.0655765	0.98087	0.00916555	0.0356121	0.797348	0.649773	0.045415	0.858942
Feigrisolide D	0.0028225	0.16632	0.31398	0.588383	0.696003	0.00459735	0.158317	0.00981752	0.342271	0.720861	0.489962	0.440512	0.464262	0.0764097	0.0605506	0.000381543	0.730609	0.598145	0.82873	0.0989884	0.879591	0.000766635	0.29928	0.00521301	0.460796	0.745716	0.790403	0.544948	0.000107935	0.0136826	0.196392	0.455568	0.000292386	0.447948	0.293354	0.0269999	0.647529	0.48856	0.721361	0.366283	0.387652	0.354833	0.142124	0.36146	0.557121	0.14519	0.231758	0.00677692	0.366884
Huperzine P	0.602028	0.454568	0.888216	0.592338	0.610582	0.946845	0.215848	0.66549	0.97628	0.864646	0.446141	0.96205	0.35242	0.307849	0.248622	0.518202	0.985076	0.588162	0.500689	0.733886	0.915233	0.45543	0.940221	0.645806	0.297853	0.271218	0.98902	0.351155	0.51566	0.498977	0.767279	0.96306	0.843782	0.387359	0.305208	0.322438	0.495493	0.347896	0.338959	0.108039	0.377208	0.681167	0.365164	0.22584	0.552292	0.0518154	0.672713	0.780597	0.56197
[truncated: 86 more columns]
